# Supplementary material for: Elemental analyses reveal distinct mineralization patterns in radular teeth of various molluscan taxa
Source: Springer Nature journal article supplement (doi:10.1038/s41598-022-11026-w), 2022-05-07
Supplement: 41598_2022_11026_MOESM1_ESM.pdf [file 41598_2022_11026_MOESM1_ESM.pdf]

**Elemental analyses reveal distinct mineralization patterns in radular teeth of various Molluscan taxa**

Wencke Krings<sup>1,2,3\*</sup>, Jan-Ole Brütt<sup>1,2</sup>, Stanislav N. Gorb<sup>3</sup>

<sup>1</sup> Department of Behavioral Biology, Institute of Cell and Systems Biology of Animals, Universität Hamburg, Martin-Luther-King-Platz 3, 20146 Hamburg, Germany

<sup>2</sup> Department of Mammalogy and Palaeoanthropology, Leibniz Institute for the Analysis of Biodiversity Change, Martin-Luther-King-Platz 3, 20146 Hamburg, Germany

<sup>3</sup> Department of Functional Morphology and Biomechanics, Zoological Institute, Christian-Albrechts-Universität zu Kiel, Am Botanischen Garten 9, 24118 Kiel, Germany

\*corresponding author: wencke.krings@uni-hamburg.de

**Supplementary materials**

**Additional references for Supplementary:**

190. Krings, W., Karabacak, H. & Gorb, S. N. From the knitting shop: the first physical and dynamic model of the taenioglossan radula (Mollusca: Gastropoda) aids in unravelling functional principles of the radular morphology. *J. R. Soc. Interface* 18(182), 20210377 (2121).

191. Krings, W., Marcé-Nogué, J., Karabacak, H., Glaubrecht, M. & Gorb, S. N. Finite element analysis of individual taenioglossan radular teeth (Mollusca). *Acta Biomater.* 115, 317-332 (2020).

192. Krings, W. & Gorb, S. N. Radula packing and storage facilitated by tooth morphology in selected taenioglossan Gastropoda. *J. Molluscan Stud.* 87(2), eyab007 (2021).

193. Lee, A. P., Brooker, L. R., Bronswijk, W. van, Macey, D. J. & Webb, J. Contribution of Raman spectroscopy to identification of biominerals present in teeth of *Acanthopleura rehderi*, *Acanthopleura curtisiana*, and *Onithochiton quercinus*. *Biopolymers* 72, 299-301 (2003).

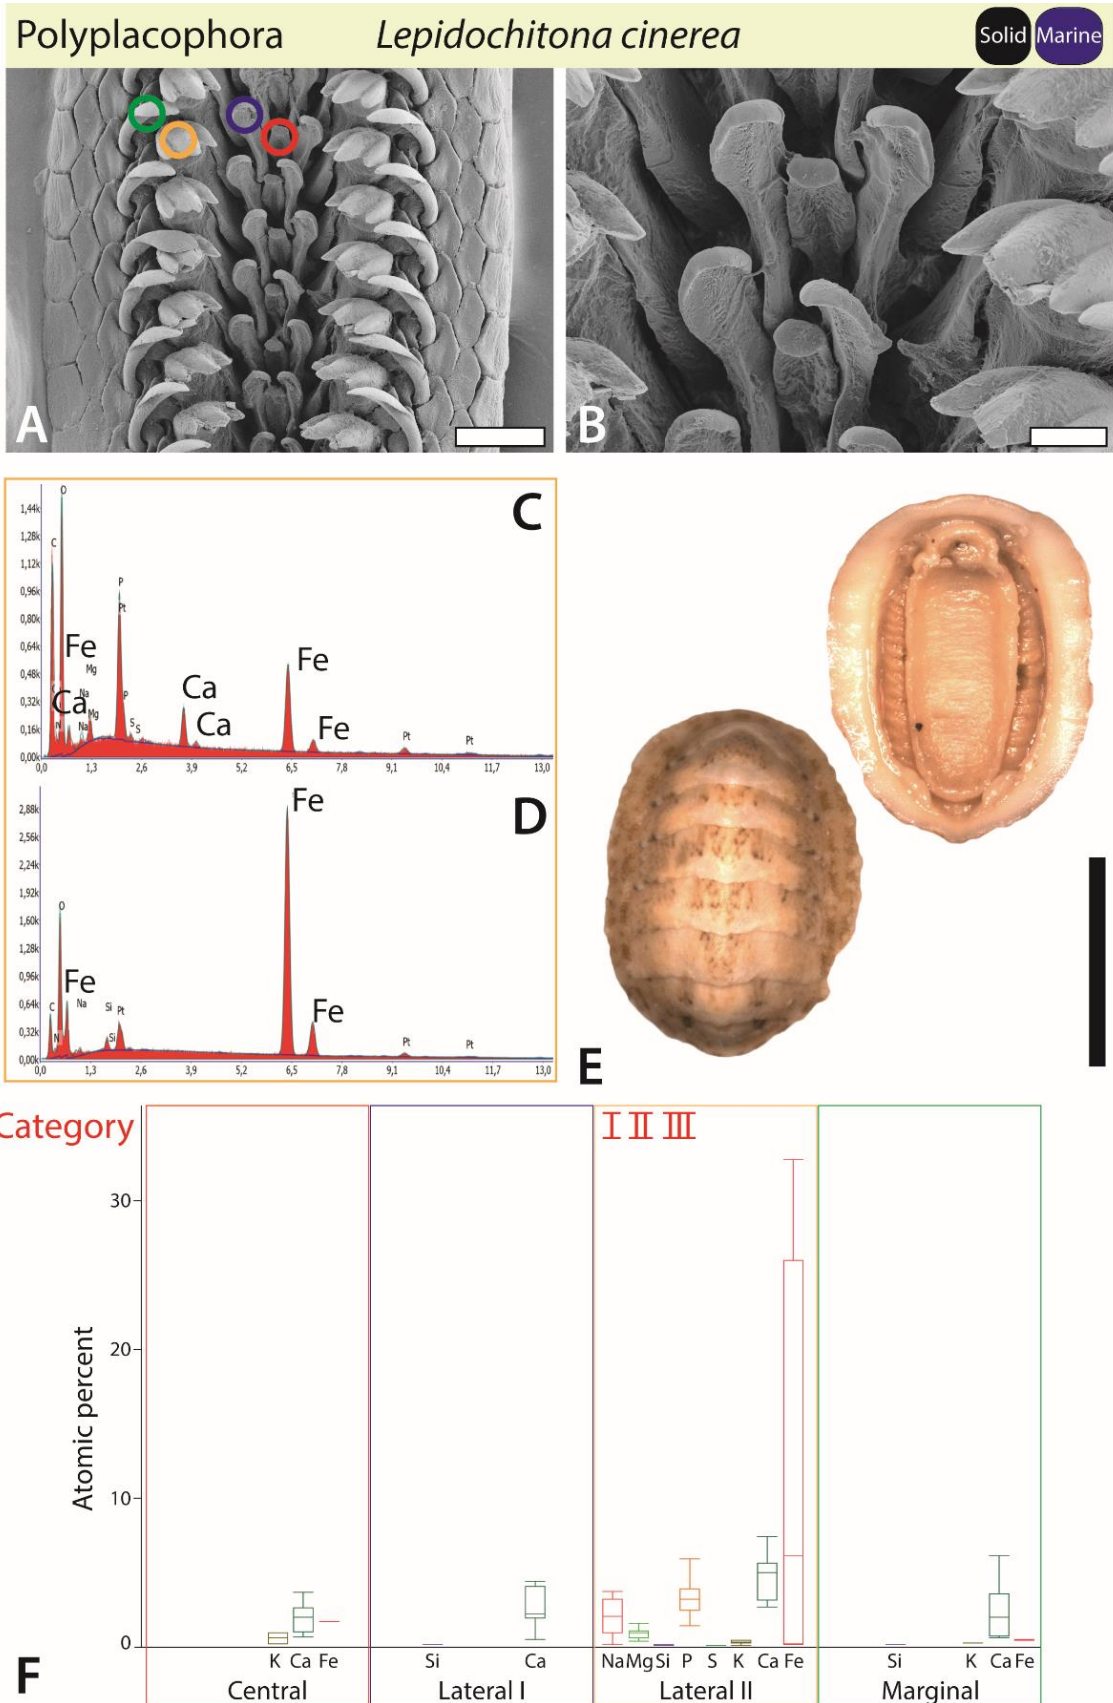

**Supplementary Figure 1. *Lepidochitona cinerea*:** A-B. SEM images of the working zone of one representative radula (adapted from 116). The circles indicate the area of the EDX analysis: green, marginal; yellow, lateral II; blue, lateral I; red, central teeth. C-D. Representative EDX spectra of the lateral tooth II. E. Habitus from one representative specimen in dorsal and ventral views. F. Results from EDX analyses: elemental proportions, given in atomic percent, for central, lateral I, lateral II, and marginal teeth. Proposed biomineralization categories for each tooth type are written in red. Scale bars: A, 100  $\mu$ m; B, 30  $\mu$ m; E, 5 mm.

Polyplacophora *Acanthochitona fascicularis*

Solid Marine

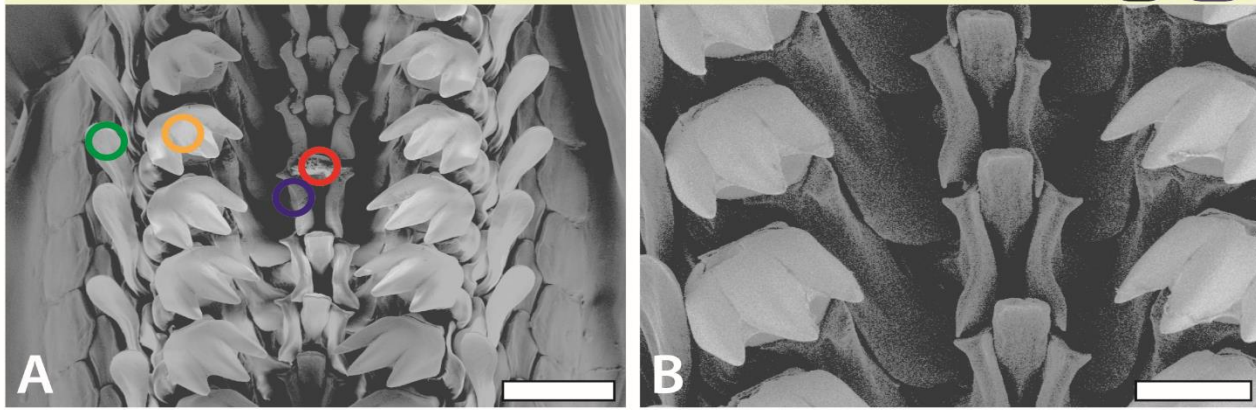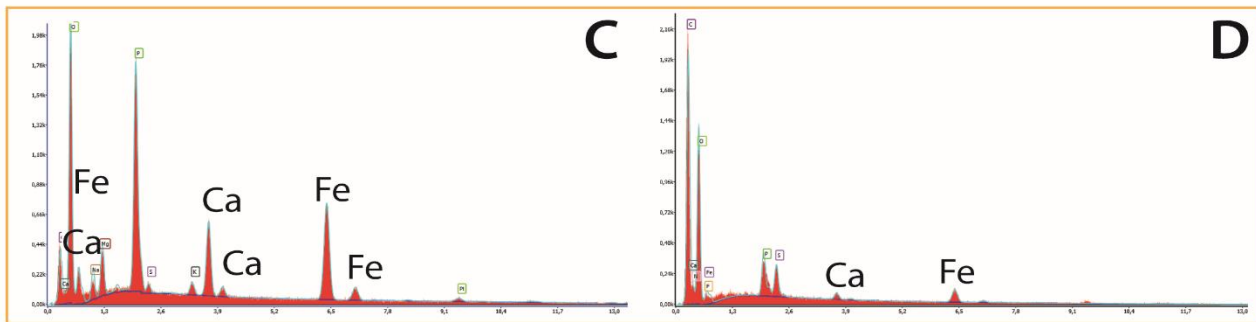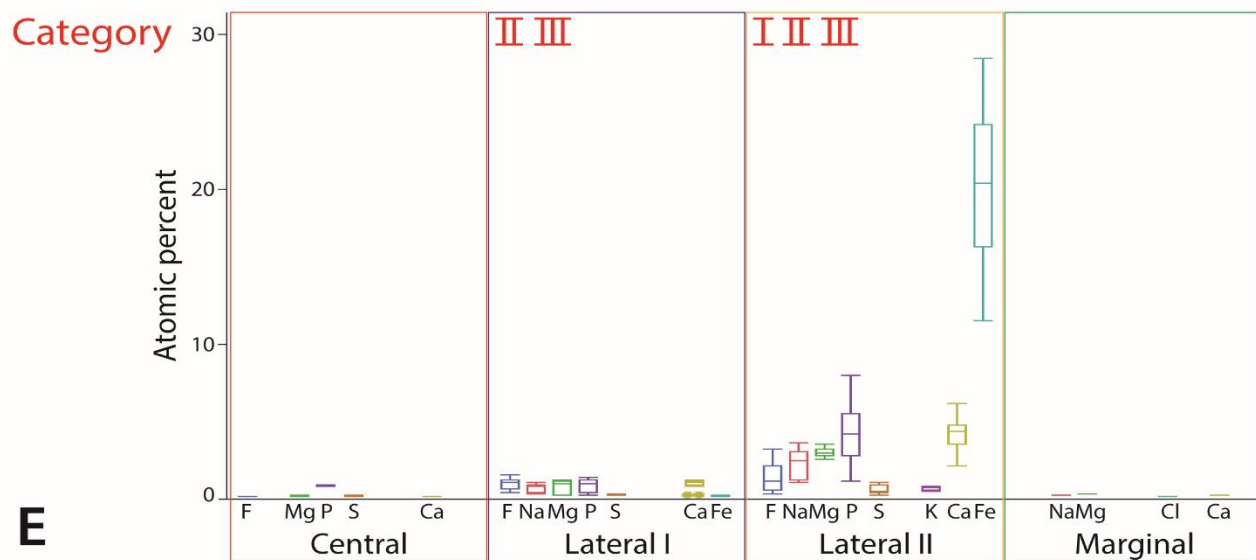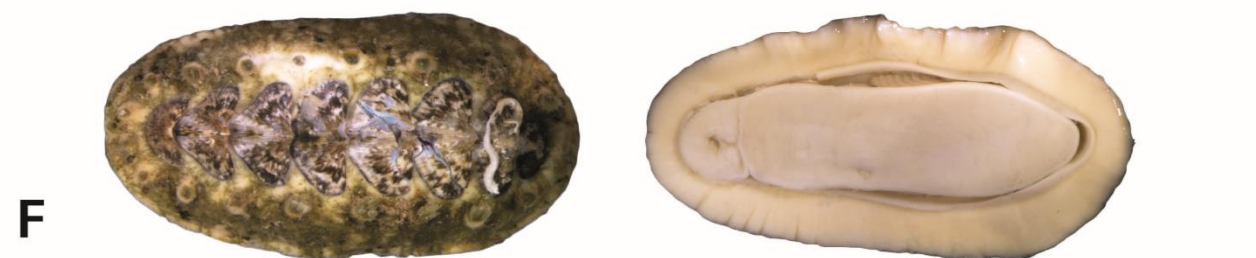

**Supplementary Figure 2. *Acanthochitona fascicularis*:** A-B. SEM images of the working zone of one representative radula. The circles indicate the area of the EDX analysis: green, marginal; yellow, lateral II; blue, lateral I; red, central teeth. C-D. Representative EDX spectra of the lateral tooth II. E. Results from EDX analyses: elemental proportions, given in atomic percent, for central, lateral I, lateral II, and marginal teeth. F. Habitus from one representative specimen in dorsal and ventral views. Proposed biomineralization categories for each tooth type are written in red. Scale bars: A, 200  $\mu$ m; B, 100  $\mu$ m.

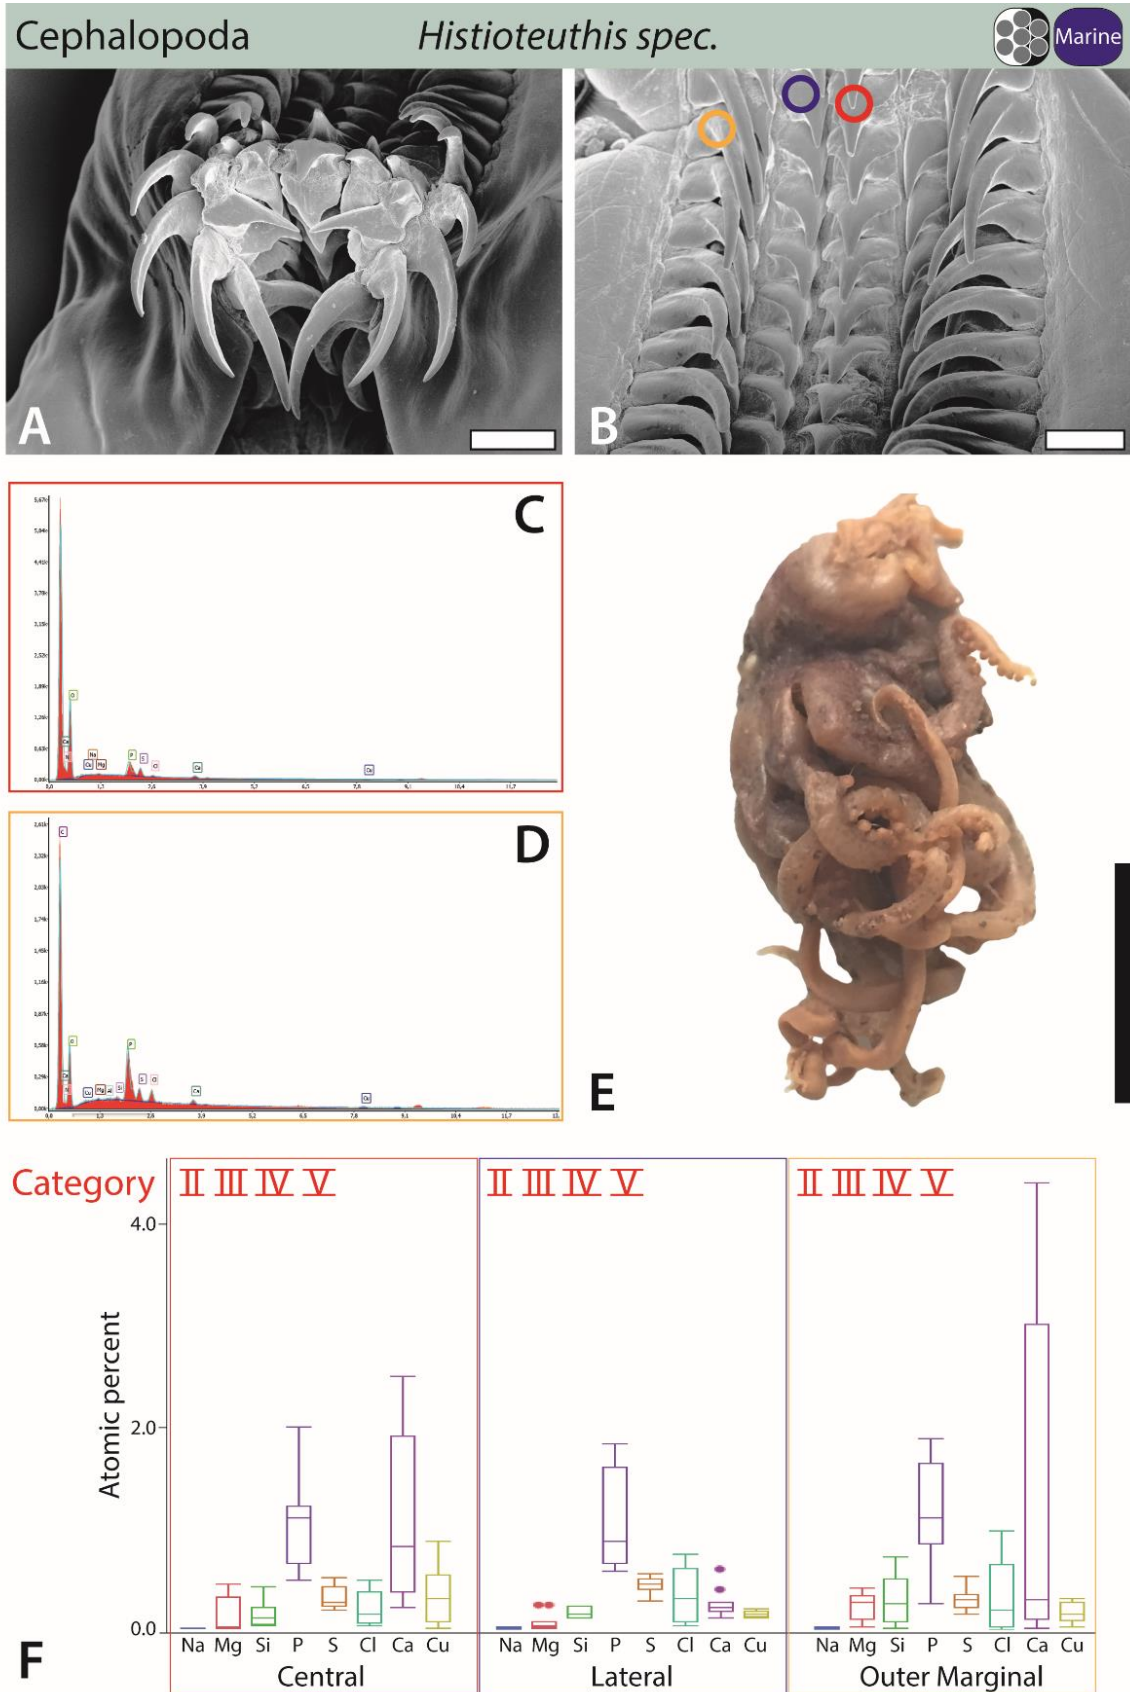

**Supplementary Figure 3. *Histioteuthis spec.***: A-B. SEM images of the working zone of one representative radula. The circles indicate the area of the EDX analysis: yellow, outer marginal; blue, lateral; red, central teeth. C-D. Representative EDX spectra of central (C) and outer marginal (D) teeth. E. Habitus of one representative specimen. F. Results from EDX analyses: elemental proportions, given in atomic percent, for central, lateral I, and outer marginal teeth. Proposed biomineralization categories for each tooth type are written in red. Scale bars: A, 100  $\mu$ m; B, 60  $\mu$ m; E, 2 cm.

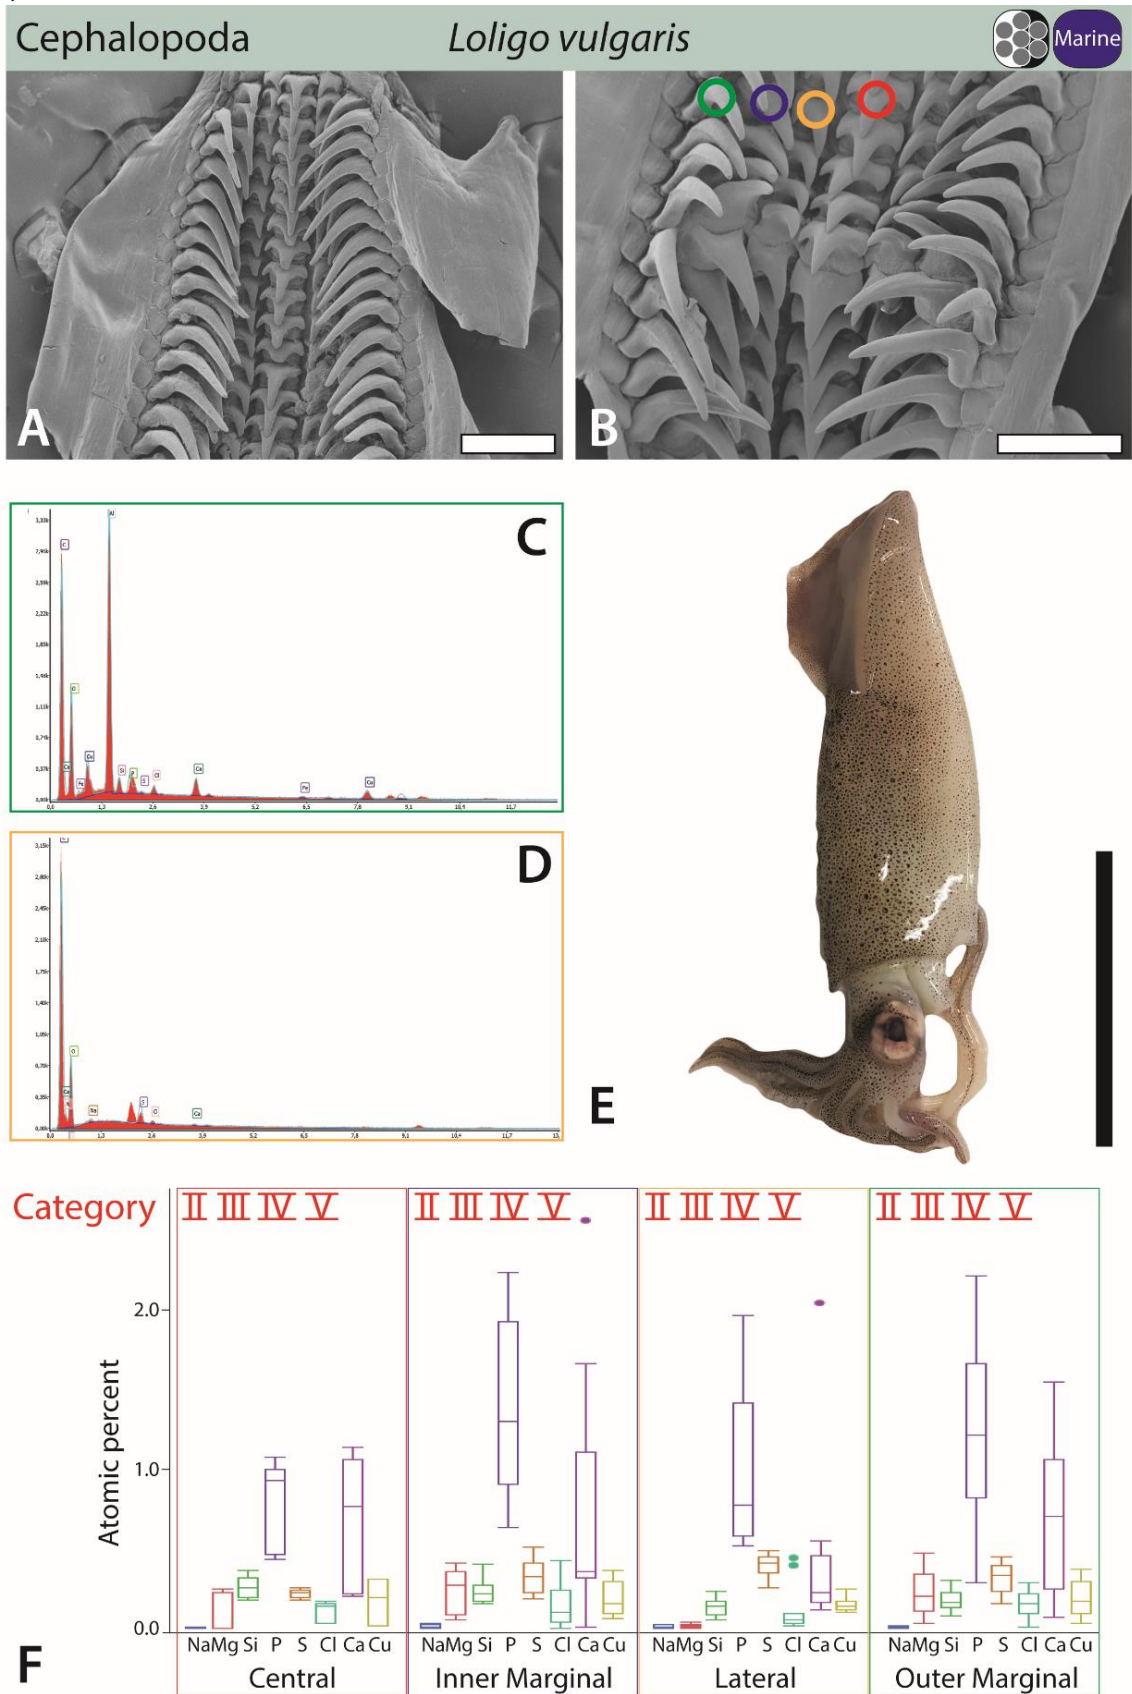

**Supplementary Figure 4. *Loligo vulgaris*:** A-B. SEM images of the working zone of one representative radula. The circles indicate the area of the EDX analysis: green, outer marginal; blue, inner marginal; yellow, lateral; red, central teeth. C-D. Representative EDX spectra of outer marginal (C) and lateral (D) teeth. E. Habitus of one representative specimen. F. Results from EDX analyses: elemental proportions, given in atomic percent, for central, inner marginal, lateral, and outer marginal teeth. Proposed biomineralization categories for each tooth type are written in red. Scale bars: A, 300  $\mu\text{m}$ ; B, 400  $\mu\text{m}$ ; E, 10 cm.

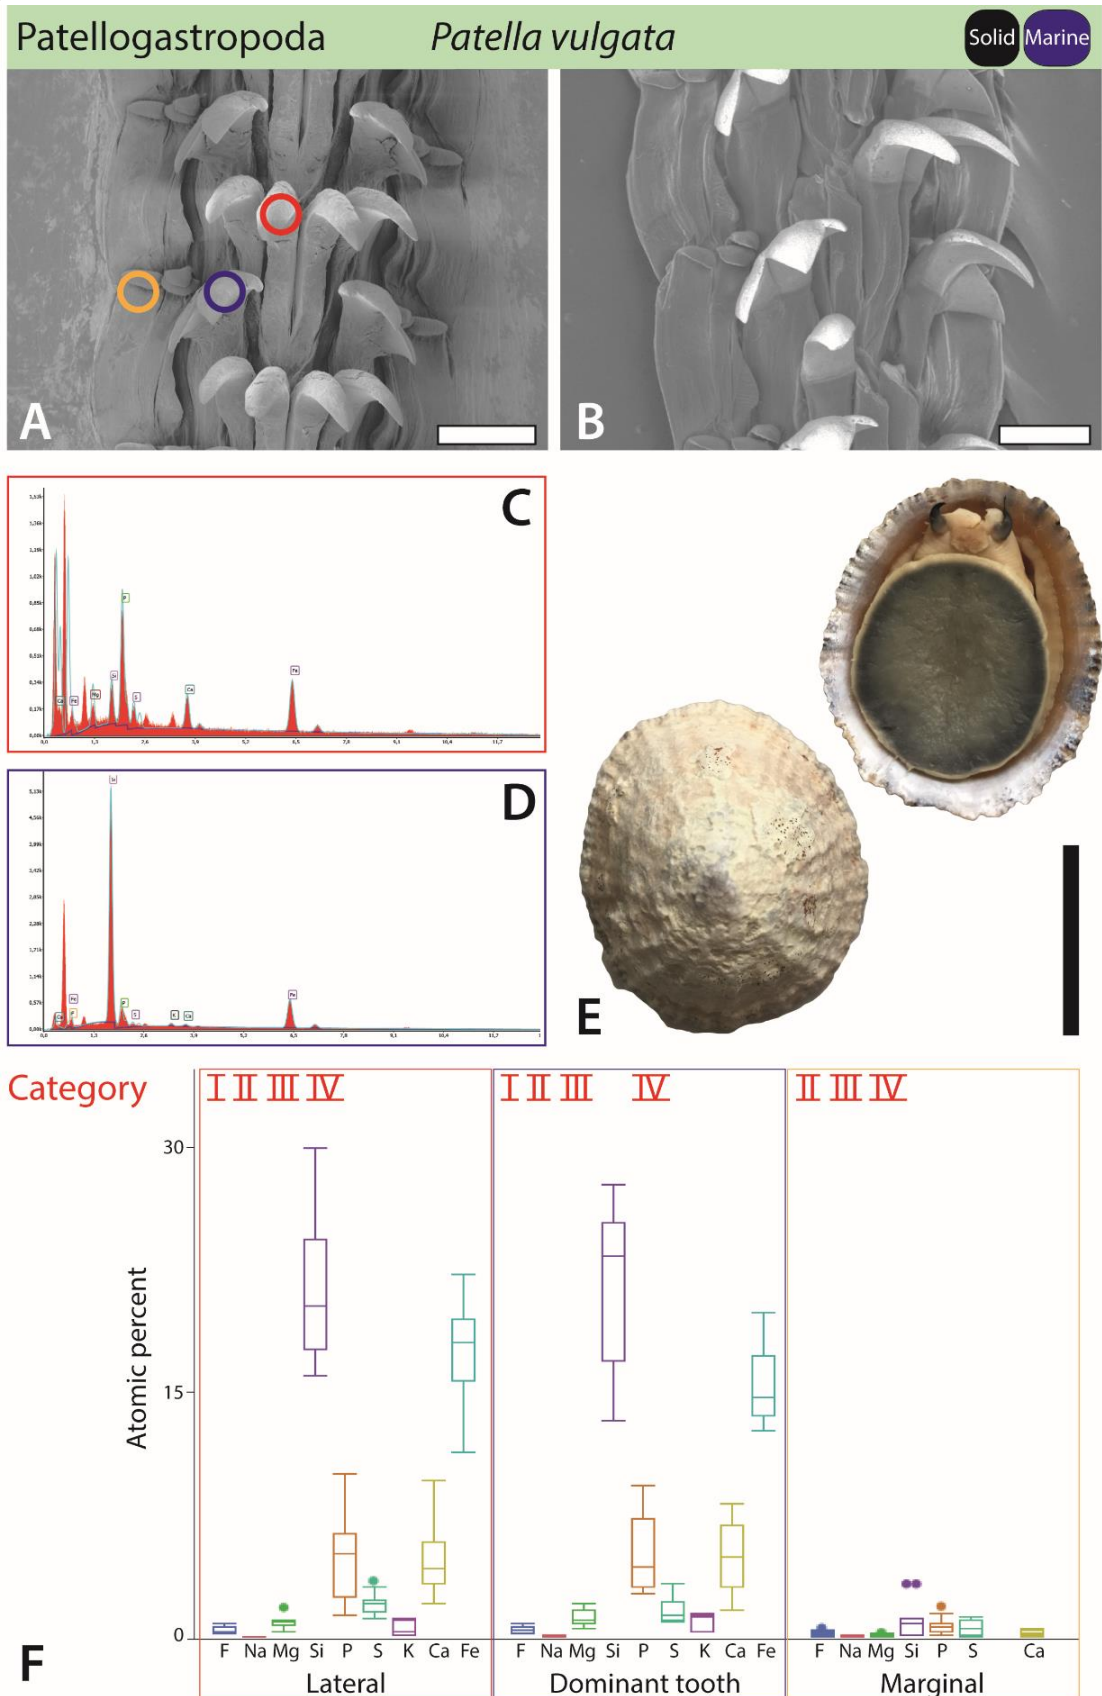

**Supplementary Figure 5. *Patella vulgata*:** A-B. SEM images of the working zone of one representative radula. The circles indicate the area of EDX analysis: yellow, marginal; blue, lateral; red, central teeth. C-D. Representative EDX spectra of central (C) and lateral I (D) teeth. E. Habitus from one representative specimen in dorsal and ventral views. F. Results from EDX analyses: elemental proportions, given in atomic percent, for central, lateral, and marginal teeth. Proposed biomineralization categories for each tooth type are written in red. Scale bars: A, 200  $\mu$ m; B, 150  $\mu$ m; E, 2.5 cm.

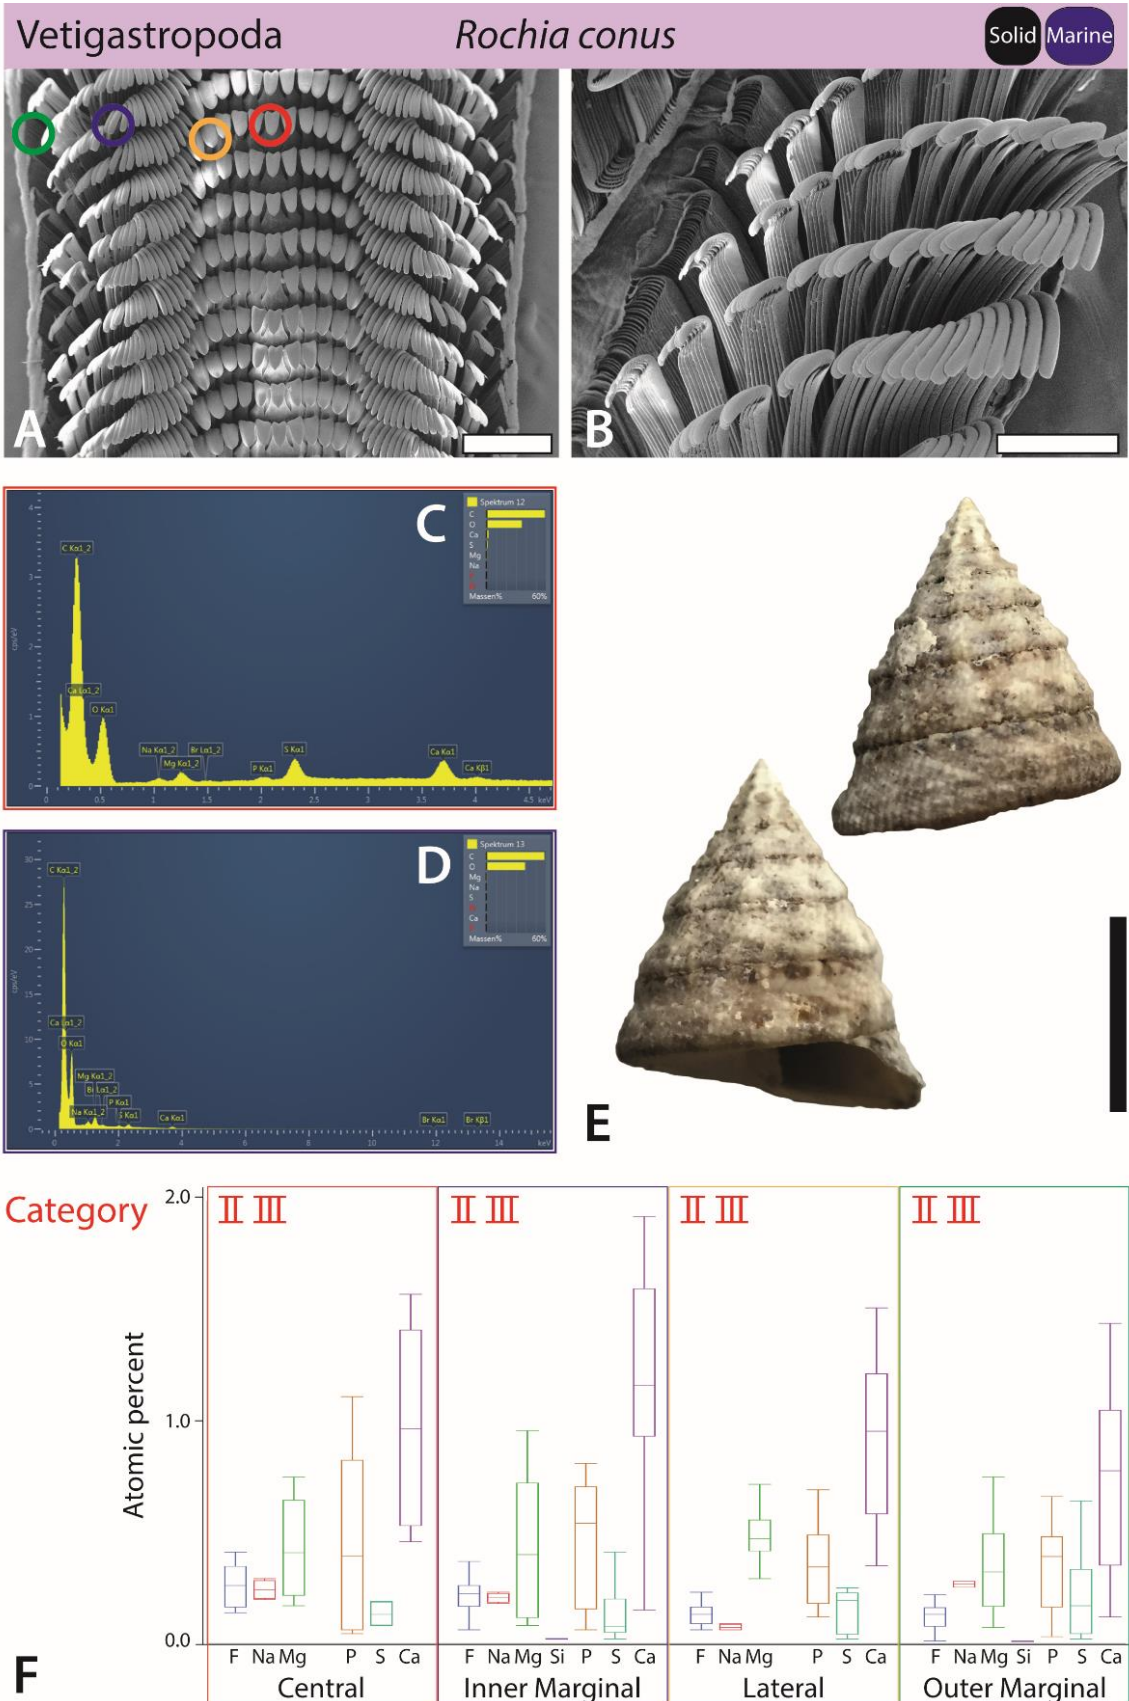

**Supplementary Figure 6. *Rochia conus*:** A-B. SEM images of the working zone of one representative radula. The circles indicate the area of the EDX analysis: green, outer marginal; blue, inner marginal; yellow, lateral; red, central teeth. C-D. Representative EDX spectra of central (C) and inner marginal (D) teeth. E. Habitus from one representative specimen in dorsal and ventral views. F. Results from EDX analyses: elemental proportions, given in atomic percent, for central, inner marginal, lateral, and outer marginal teeth. Proposed biomimneralization categories for each tooth type are written in red. Scale bars: A, 600  $\mu$ m; B, 300  $\mu$ m; E, 3.5 cm.

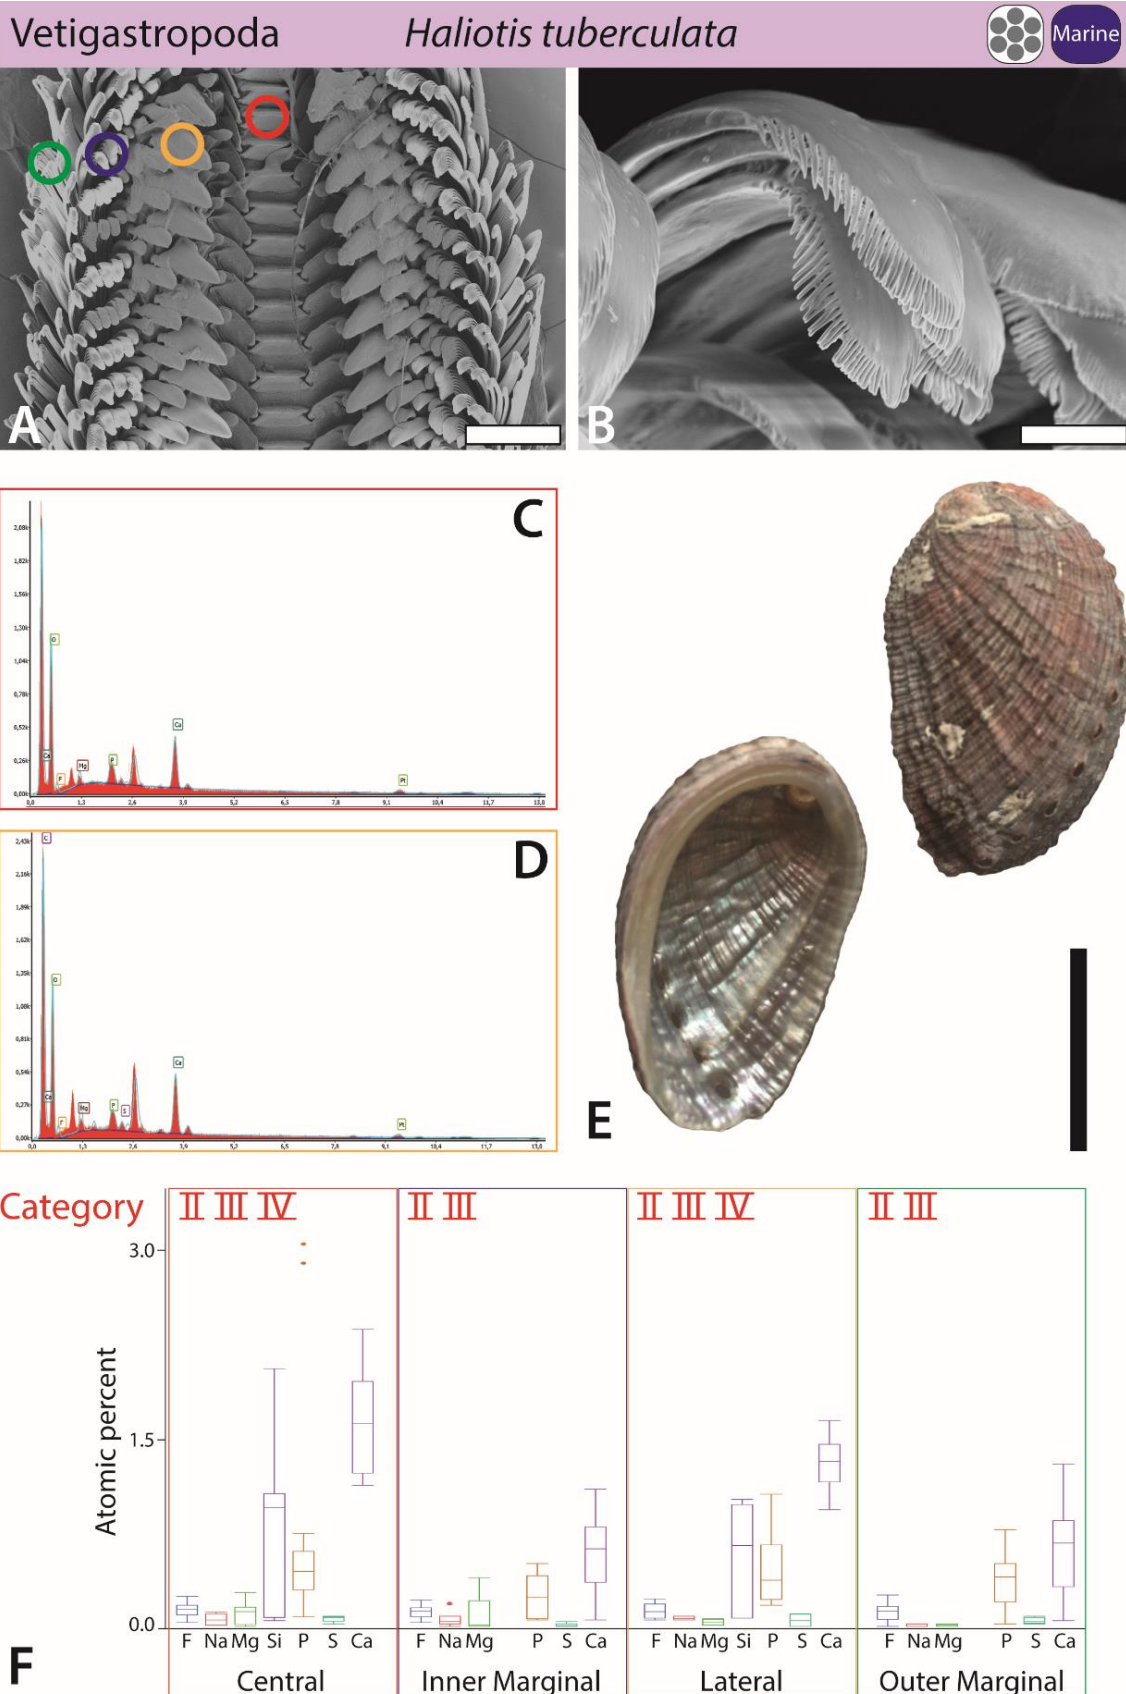

**Supplementary Figure 7. *Haliotis tuberculata*:** A-B. SEM images of the working zone of one representative radula. The circles indicate the area of the EDX analysis: green, outer marginal; blue, inner marginal; yellow, lateral; red, central teeth. C-D. Representative EDX spectra of central (C) and lateral (D) teeth. E. Habitus from one representative specimen in dorsal and ventral views. F. Results from EDX analyses: elemental proportions, given in atomic percent, for central, inner marginal, lateral, and outer marginal teeth. Proposed biomimneralization categories for each tooth type are written in red. Scale bars: A, 400 μm; B, 10 μm; E, 5.5 cm.



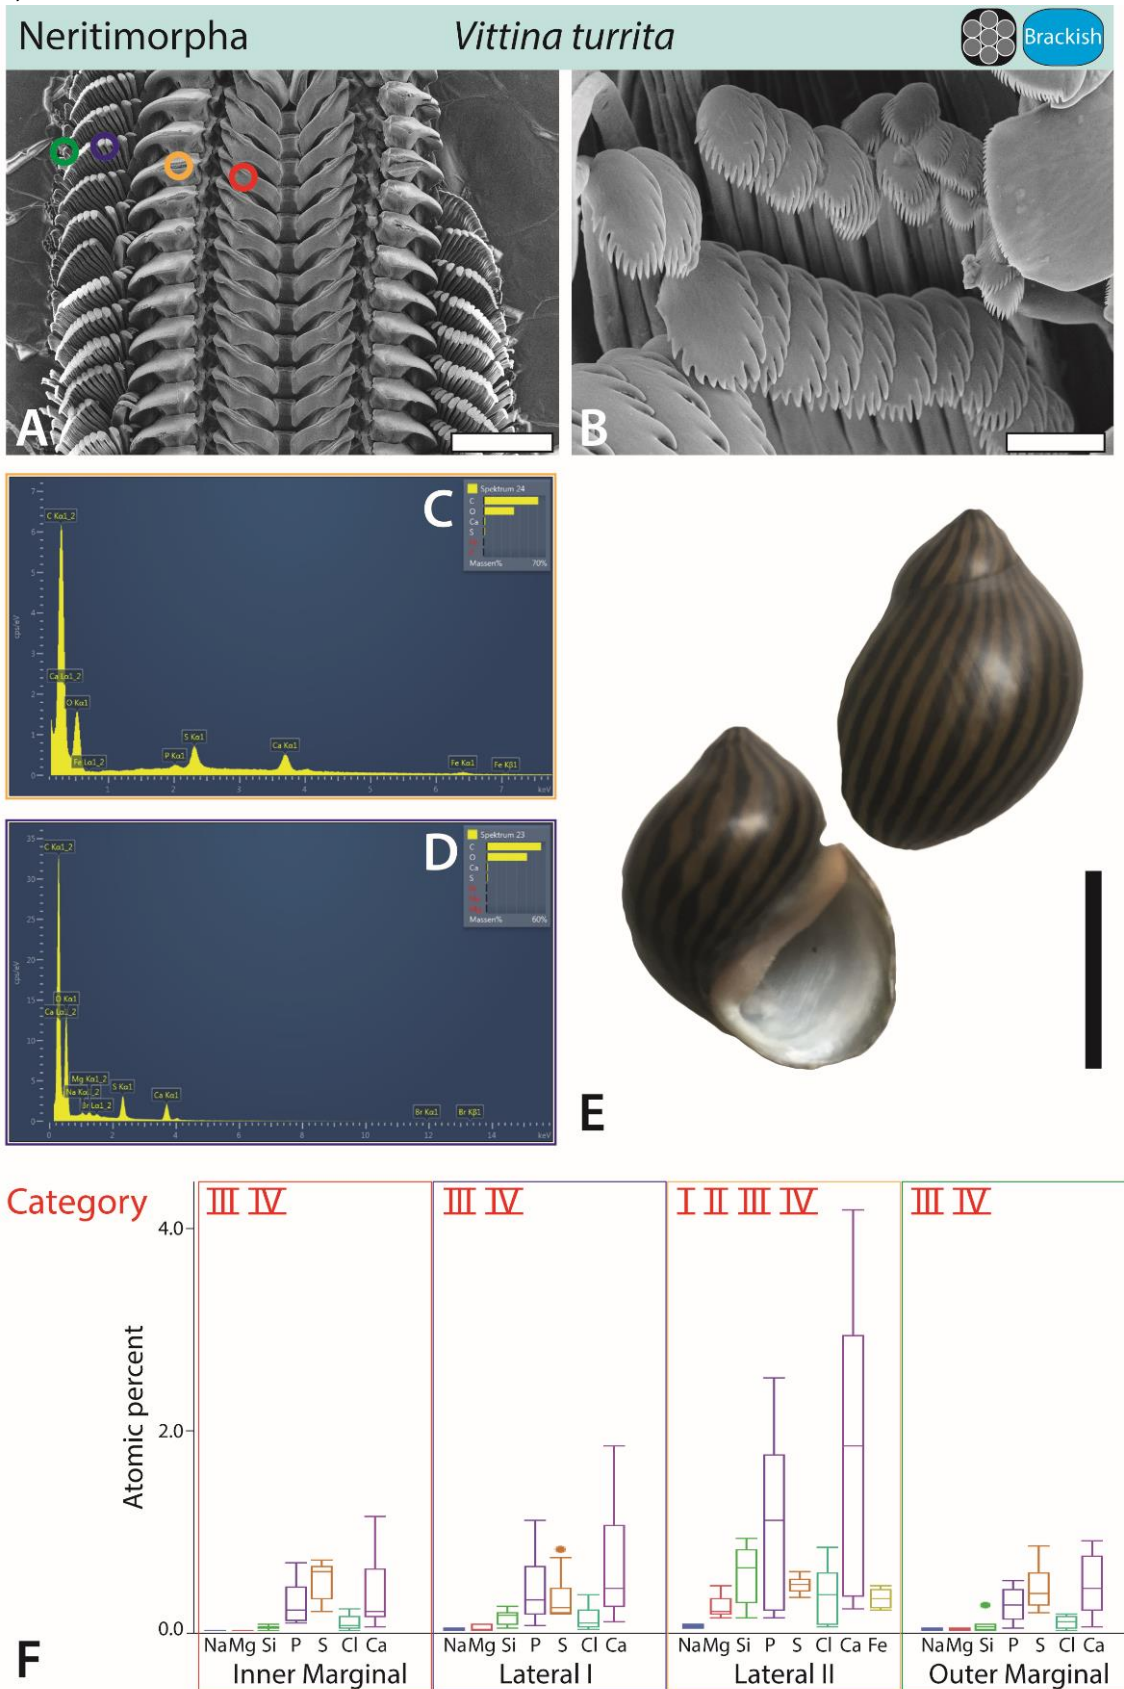

**Supplementary Figure 8. *Vittina turrita*:** A-B. SEM images of the working zone of one representative radula. The circles indicate the area of the EDX analysis: green, outer marginal; blue, inner marginal; yellow, lateral II; red, lateral I teeth. C-D. Representative EDX spectra of central (C) and lateral (D) teeth. E. Habitus from one representative specimen in dorsal and ventral views. F. Results from EDX analyses: elemental proportions, given in atomic percent, for inner marginal, lateral I, lateral II (=dominant lateral teeth), and outer marginal teeth. Proposed biomineralization categories for each tooth type are written in red. Scale bars: A, 300  $\mu$ m; B, 10  $\mu$ m; E, 1.5 cm.

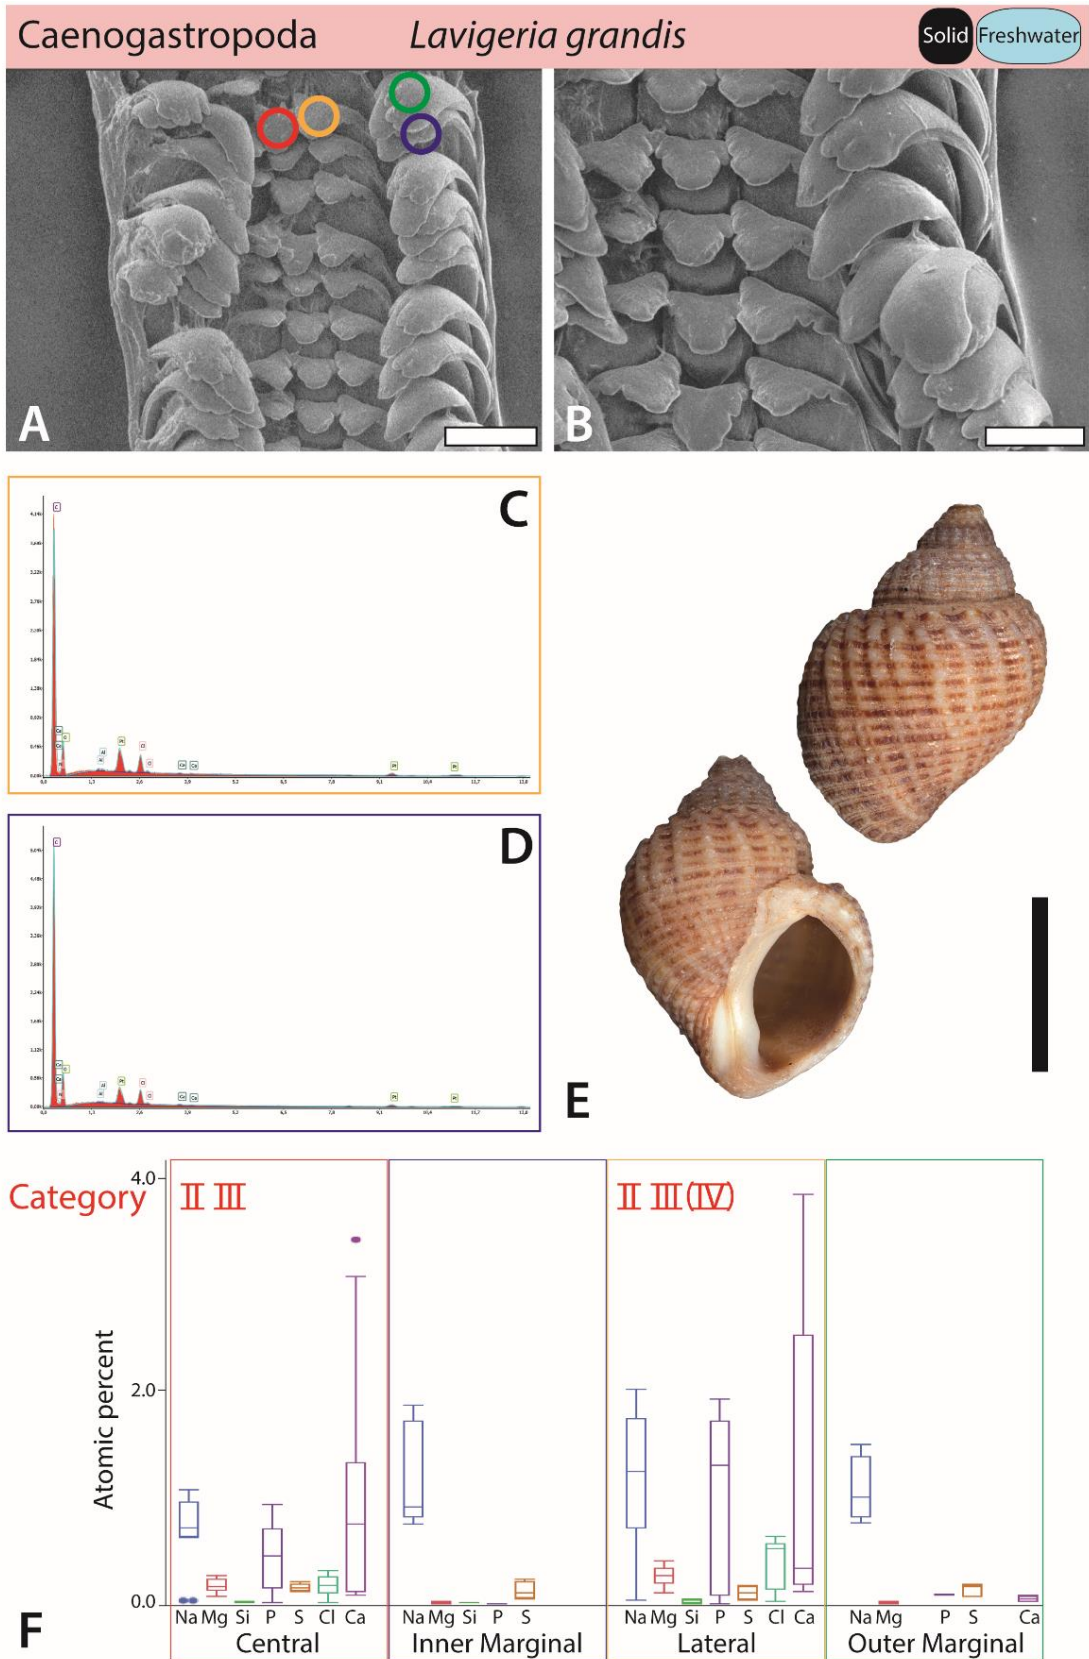

**Supplementary Figure 9. *Lavigeria grandis*:** A-B. SEM images of the working zone of one representative radula. The circles indicate the area of the EDX analysis: green, outer marginal; blue, inner marginal; yellow, lateral; red, central teeth. C-D. Representative EDX spectra of lateral (C) and inner marginal (D) teeth. E. Habitus from one representative specimen (ZMB 220.121\_3) in dorsal and ventral views. F. Results from EDX analyses: elemental proportions, given in atomic percent, for central, inner marginal, lateral, and outer marginal teeth. Proposed biomineralization categories for each tooth type are written in red. Scale bars: A, 150  $\mu$ m; B, 100  $\mu$ m; E, 1 cm.

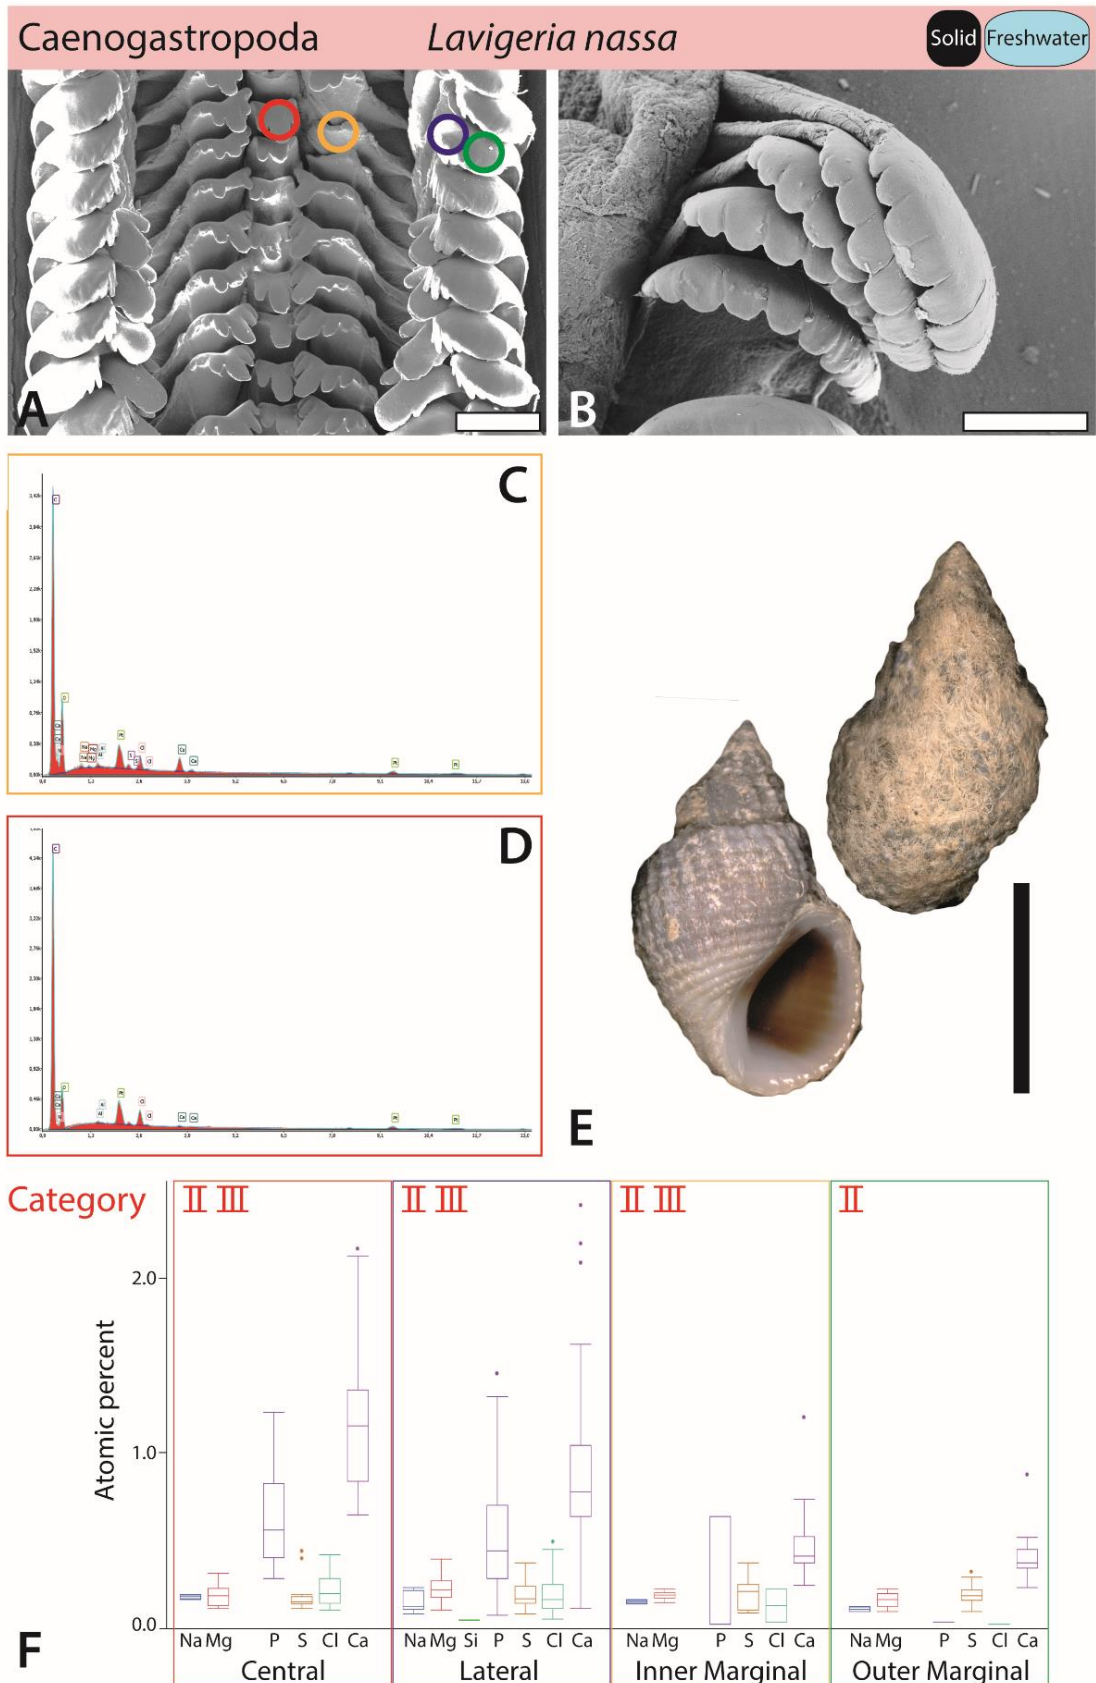

**Supplementary Figure 10. *Lavigeria nassa*:** A-B. SEM images of the working zone of one representative radula. The circles indicate the area of the EDX analysis: green, outer marginal; blue, inner marginal; yellow, lateral; red, central teeth. C-D. Representative EDX spectra of lateral (C) and central (D) teeth. E. Habitus from one representative specimen in dorsal and ventral views. F. Results from EDX analyses: elemental proportions, given in atomic percent, for central, lateral, inner marginal, and outer marginal teeth. Proposed biomineralization categories for each tooth type are written in red. Scale bars: A, 80  $\mu$ m; B, 40  $\mu$ m; E, 1 cm.

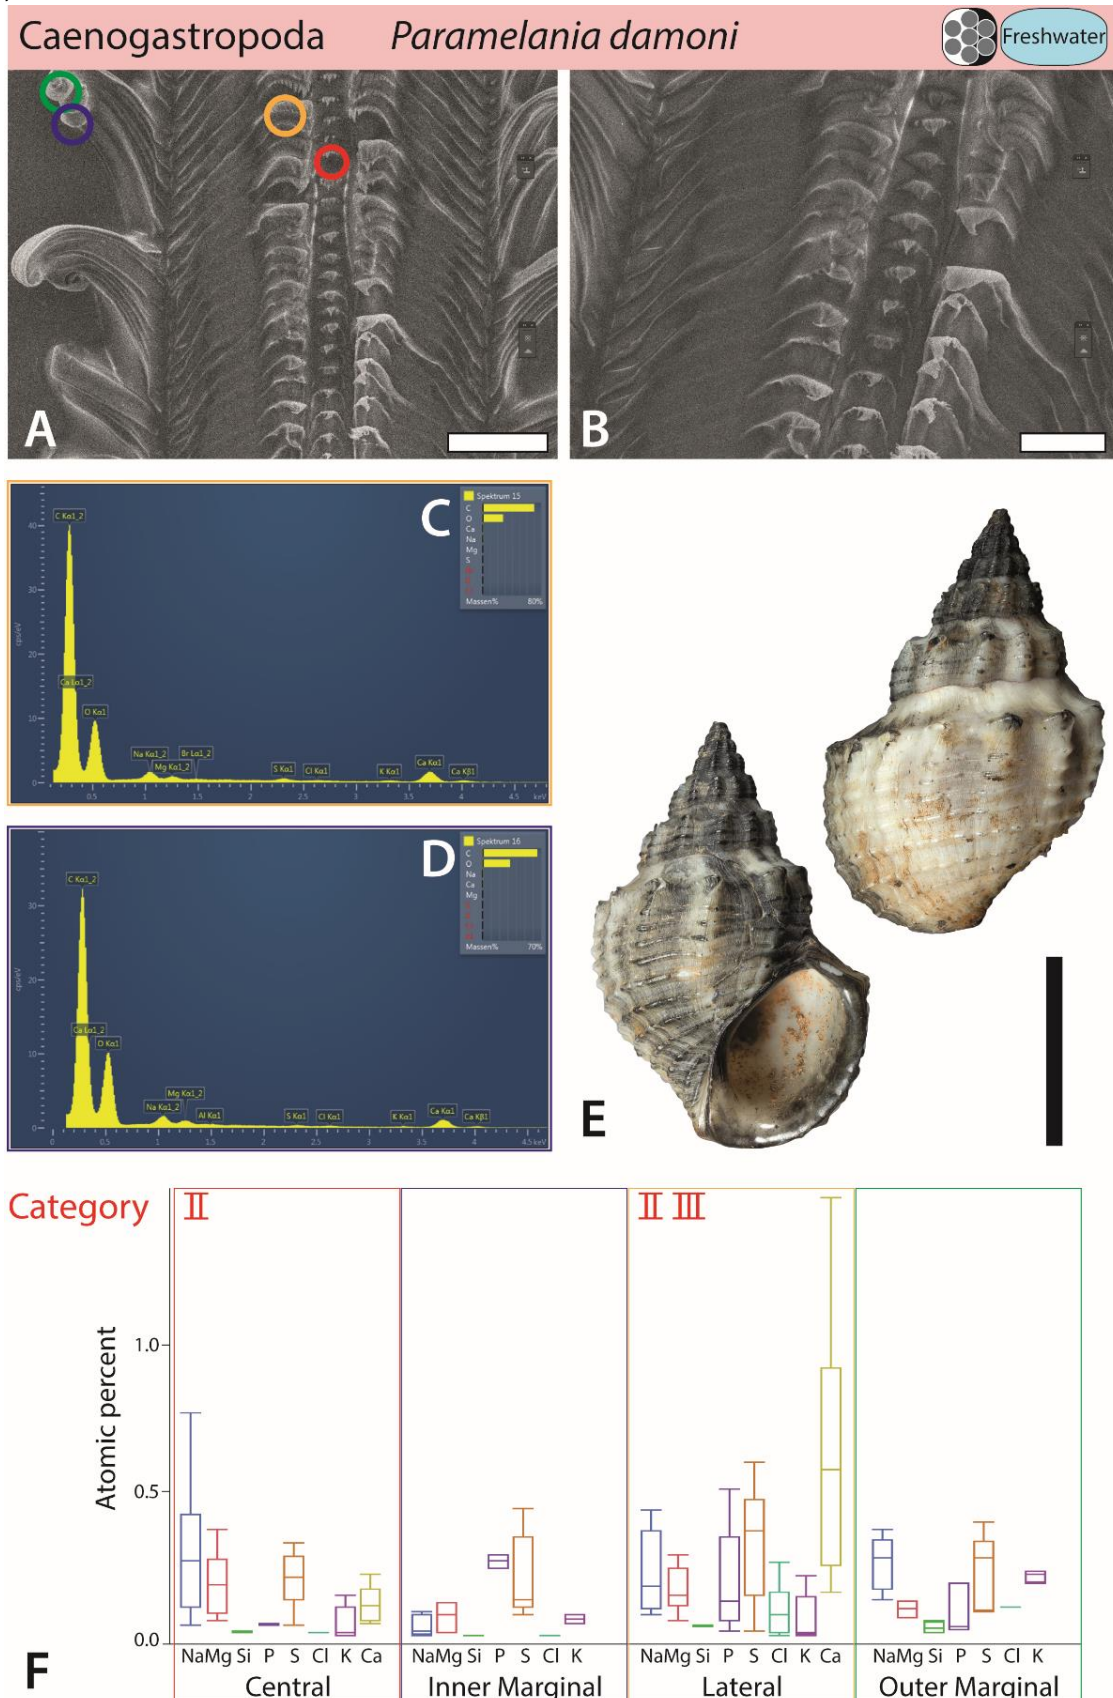

**Supplementary Figure 11. *Paramelania damoni*:** A-B. SEM images of the working zone of one representative radula. The circles indicate the area of the EDX analysis: green, outer marginal; blue, inner marginal; yellow, lateral; red, central teeth. C-D. Representative EDX spectra of lateral (C) and inner marginal (D) teeth. E. Habitus from one representative specimen (ZMB 92361\_1) in dorsal and ventral views. F. Results from EDX analyses: elemental proportions, given in atomic percent, for central, inner marginal, lateral, and outer marginal teeth. Proposed biomineralization categories for each tooth type are written in red. Scale bars: A, 100 µm; B, 50 µm; E, 1 cm.

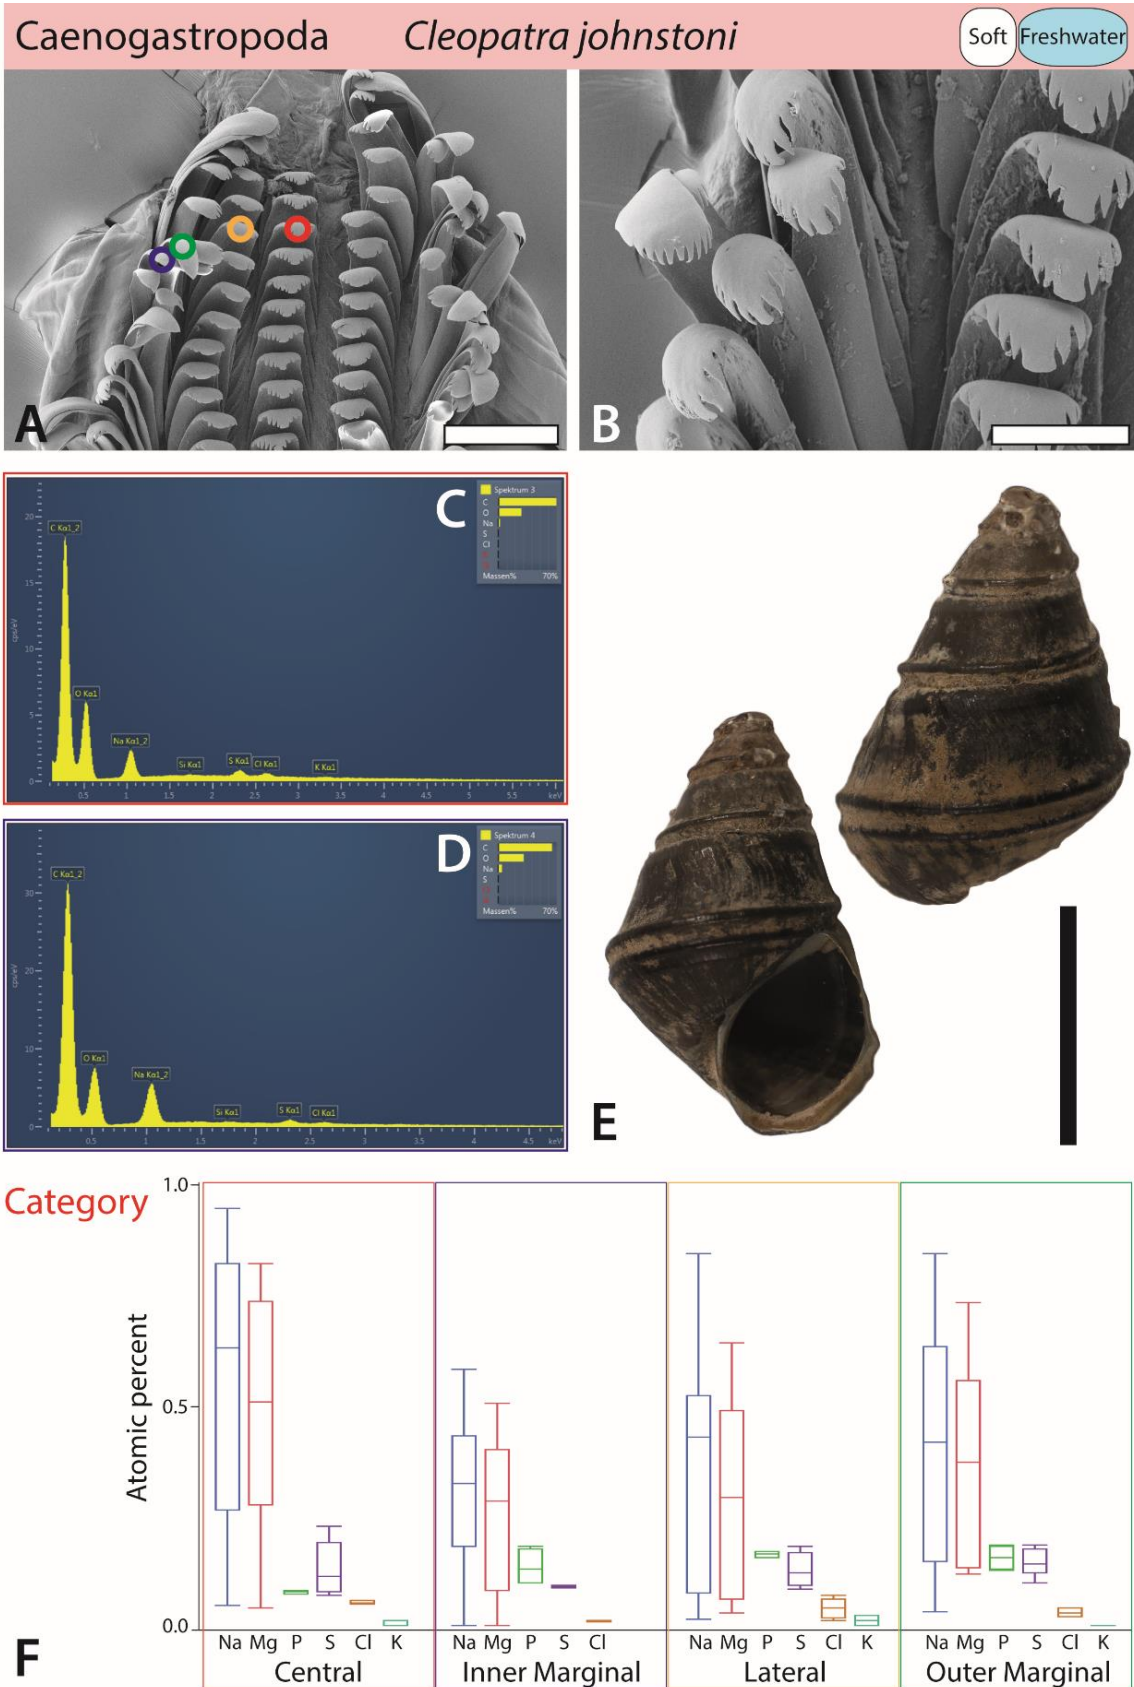

**Supplementary Figure 12. *Cleopatra johnstoni*:** A-B. SEM images of the working zone of one representative radula. The circles indicate the area of EDX analysis: green, outer marginal; blue, inner marginal; yellow, lateral; red, central teeth. C-D. Representative EDX spectra of central (C) and inner marginal (D) teeth. E. Habitus from one representative specimen in dorsal and ventral views. F. Results from EDX analyses: elemental proportions, given in atomic percent, for central, inner marginal, lateral, and outer marginal teeth. Proposed biomineralization category for each tooth type are written in red (none for this species). Scale bars: A, 200  $\mu$ m; B, 80  $\mu$ m; E, 1 cm.

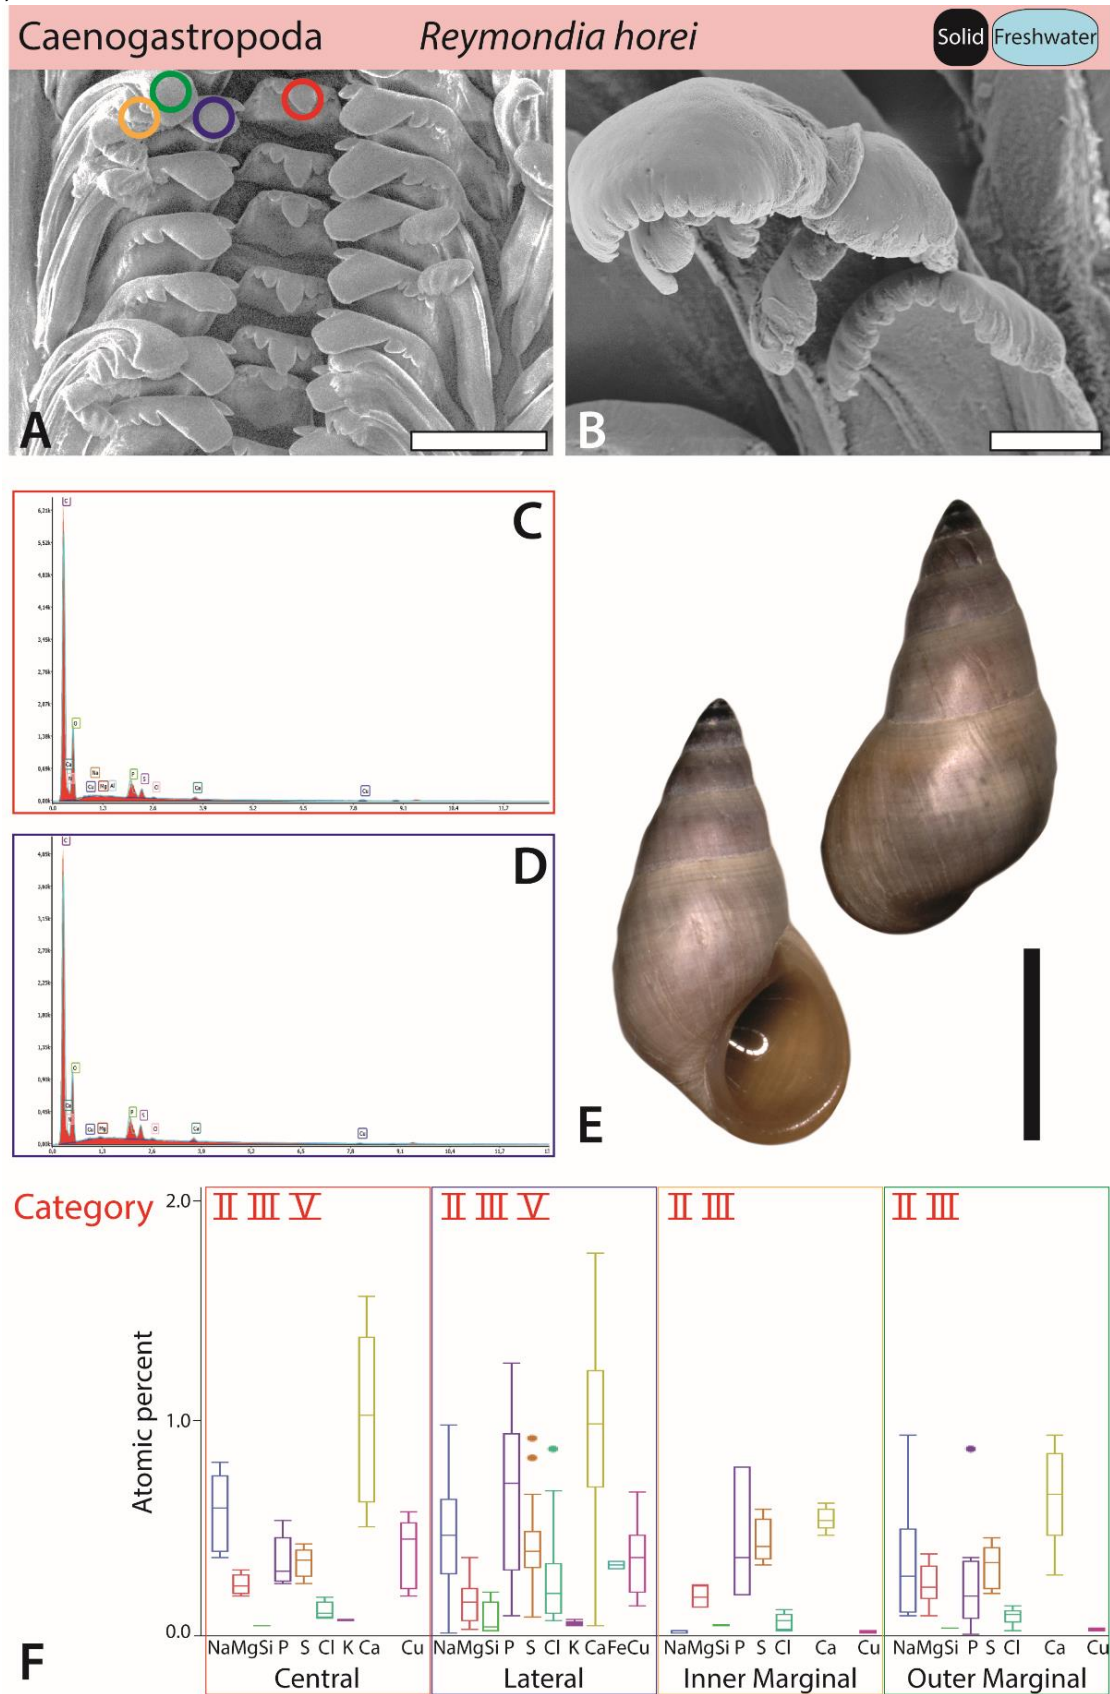

**Supplementary Figure 13. *Reymondia horei*:** A-B. SEM images of the working zone of one representative radula. The circles indicate the area of the EDX analysis: green, outer marginal; yellow, inner marginal; blue, lateral; red, central teeth. C-D. Representative EDX spectra of central (C) and lateral (D) teeth. E. Habitus from one representative specimen in dorsal and ventral views. F. Results from EDX analyses: elemental proportions, given in atomic percent, for central, lateral, inner marginal, and outer marginal teeth. Proposed biomimneralization categories for each tooth type are written in red. Scale bars: A, 100  $\mu$ m; B, 20  $\mu$ m; E, 5 mm.

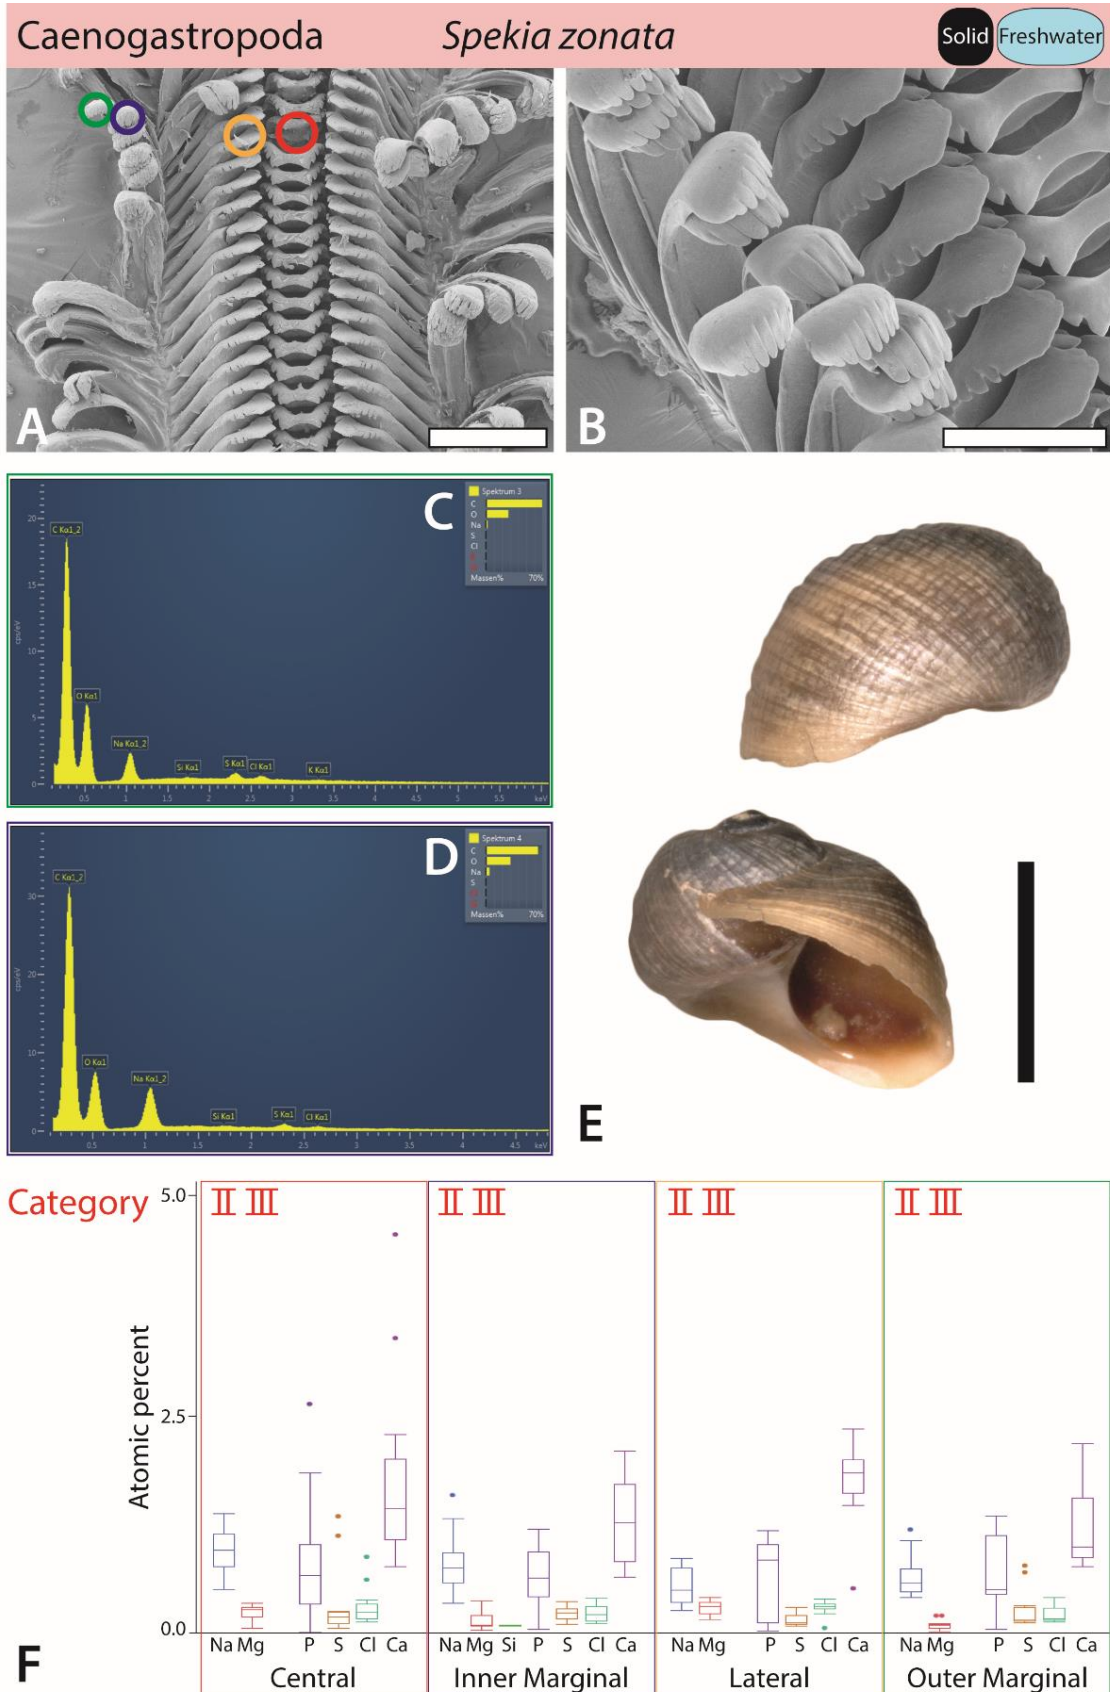

**Supplementary Figure 14. *Spekia zonata*:** A-B. SEM images of the working zone of one representative radula (see also 190, 191). The circles indicate the area of the EDX analysis: green, outer marginal; blue, inner marginal; yellow, lateral; red, central teeth. C-D. Representative EDX spectra of outer marginal (C) and inner marginal (D) teeth. E. Habitus from one representative specimen in dorsal and ventral views. F. Results from EDX analyses: elemental proportions, given in atomic percent, for central, inner marginal, lateral, and outer marginal teeth. Proposed biomineralization categories for each tooth type are written in red. Scale bars: A-B, 200  $\mu$ m; E, 5 mm.

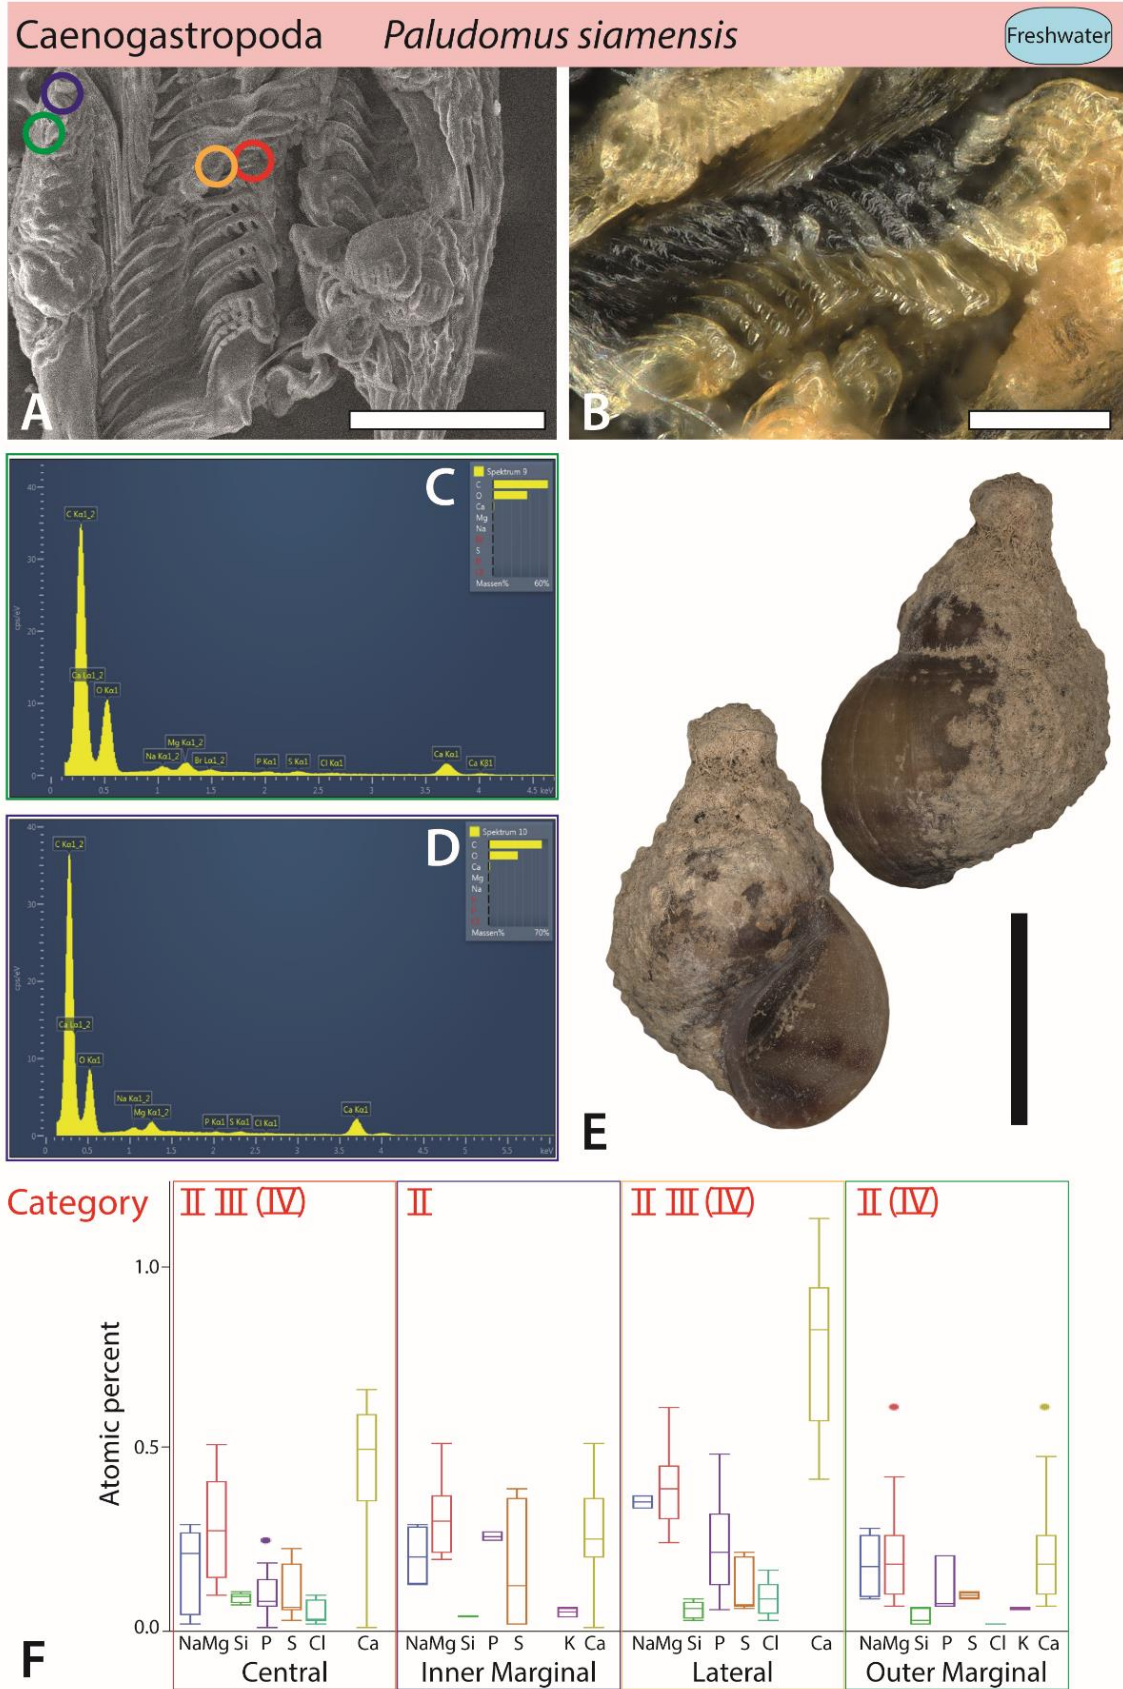

**Supplementary Figure 15. *Paludomus siamensis*:** A. SEM image and B. picture taken by Keyence of the working zone of one representative radula. The circles indicate the area of the EDX analysis: green, outer marginal; blue, inner marginal; yellow, lateral; red, central teeth. C-D. Representative EDX spectra of outer marginal (C) and inner marginal (D) teeth. E. Habitus from one representative specimen in dorsal and ventral views. F. Results from EDX analyses: elemental proportions, given in atomic percent, for central, inner marginal, lateral, and outer marginal teeth. Proposed biomineralization categories for each tooth type are written in red. Scale bars: A-B, 100  $\mu$ m; E, 6 mm.



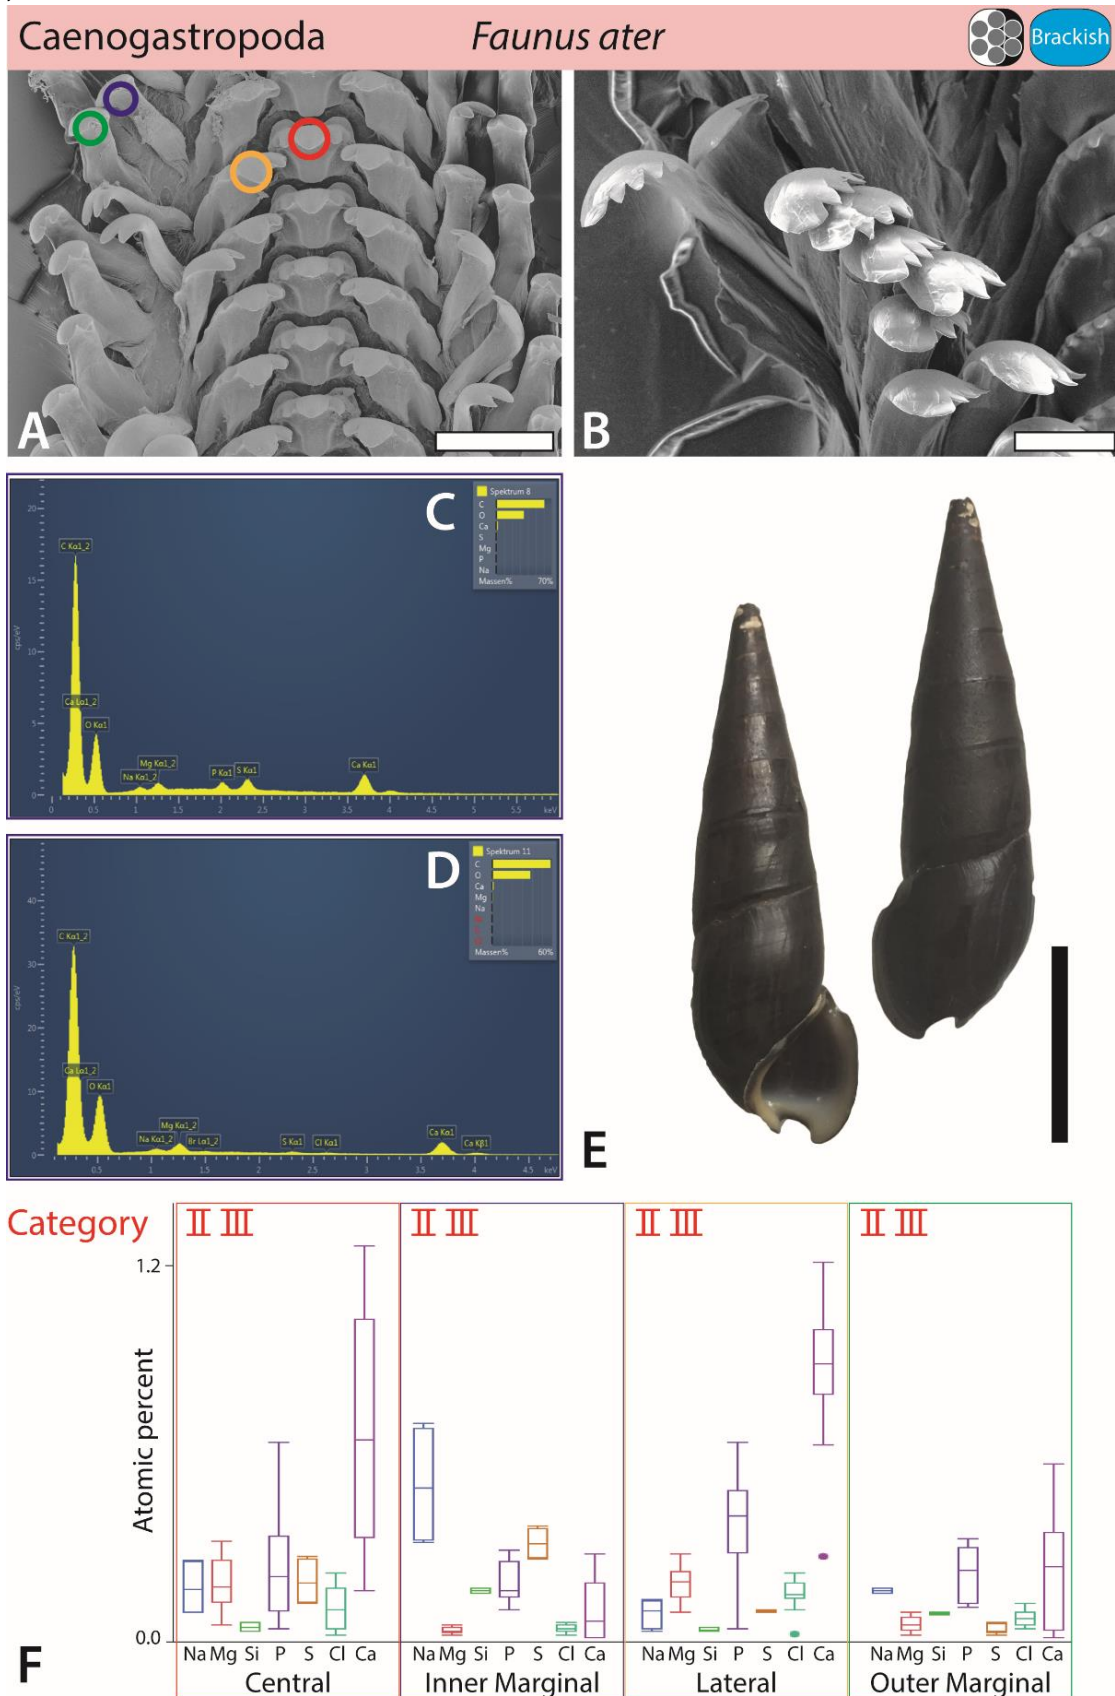

**Supplementary Figure 16. *Faunus ater*:** A-B. SEM images of the working zone of one representative radula. The circles indicate the area of the EDX analysis: green, outer marginal; blue, inner marginal; yellow, lateral; red, central teeth. C-D. Representative EDX spectra of outer marginal (C) and inner marginal (D) teeth. E. Habitus from one representative specimen in dorsal and ventral views. F. Results from EDX analyses: elemental proportions, given in atomic percent, for central, inner marginal, lateral, and outer marginal teeth. Proposed biomineralization categories for each tooth type are written in red. Scale bars: A, 200  $\mu$ m; B, 60  $\mu$ m; E, 2 cm.

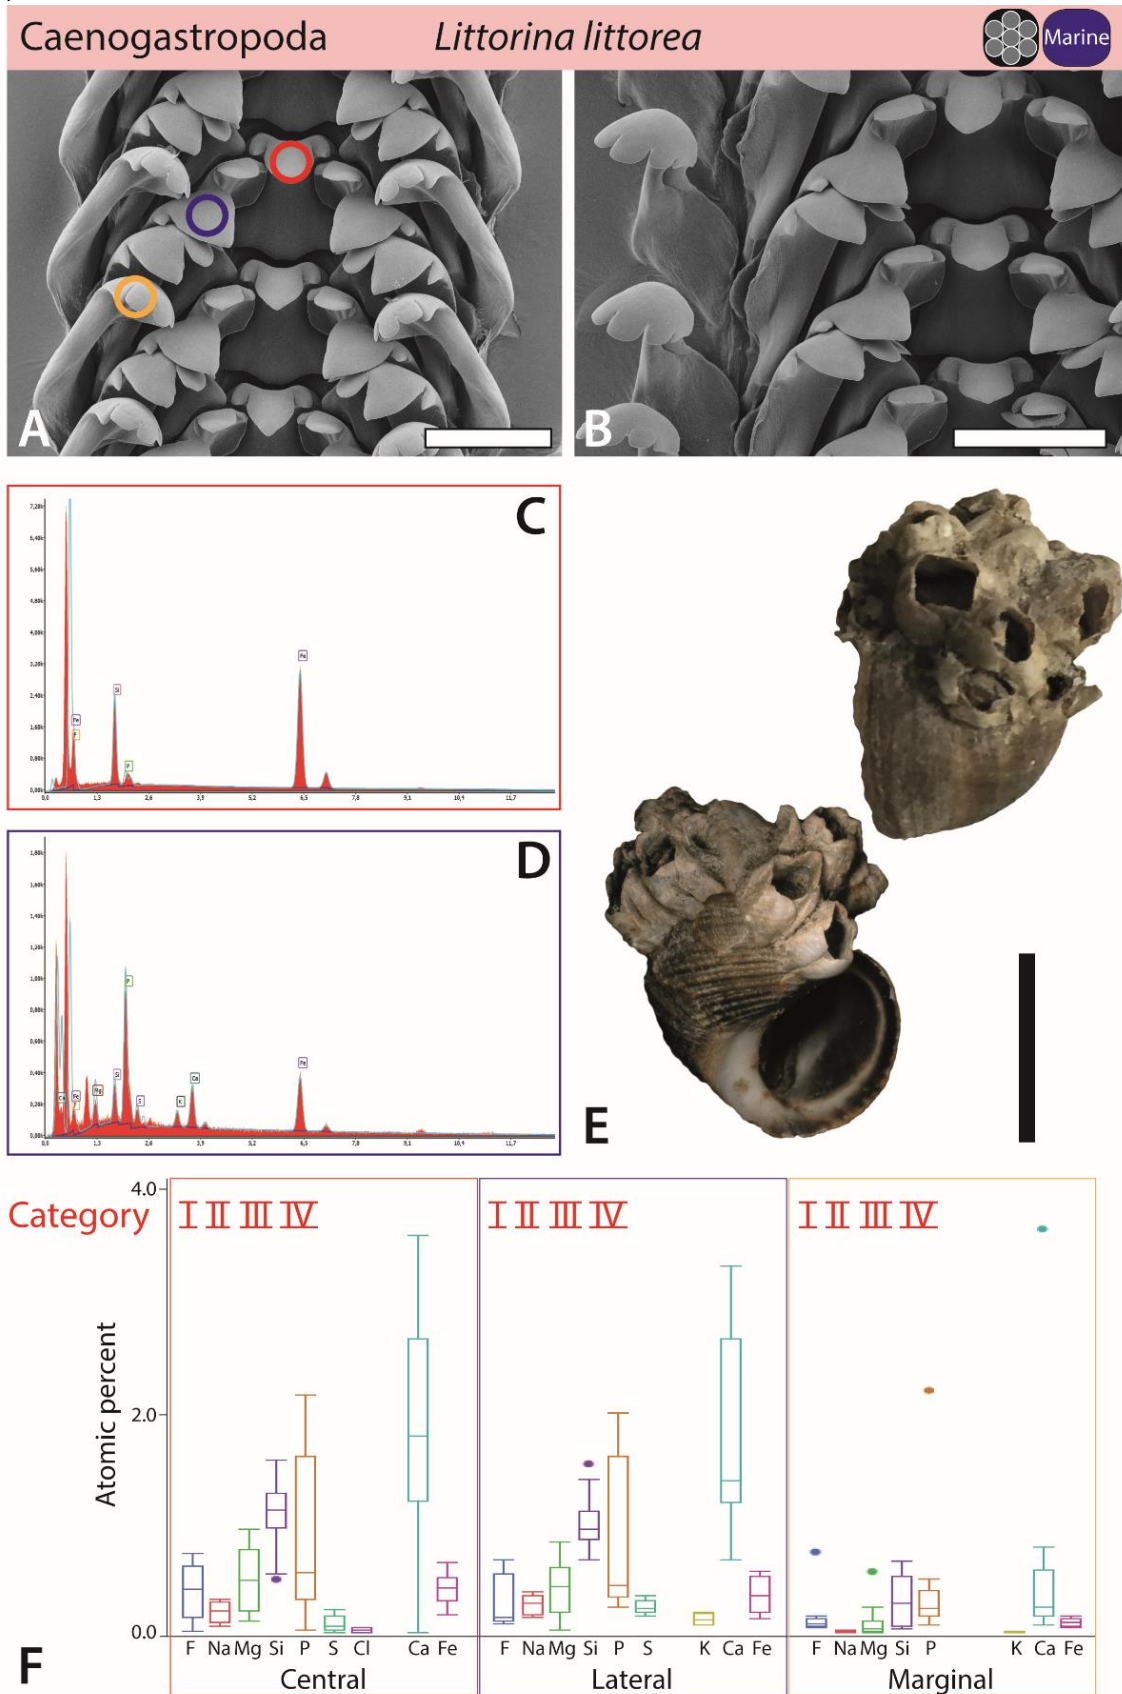

**Supplementary Figure 17. *Littorina littorea*:** A-B. SEM images of the working zone of one representative radula (see also 192). The circles indicate the area of the EDX analysis: yellow, marginal; blue, lateral; red, central teeth. C-D. Representative EDX spectra of central (C) and lateral (D) teeth. E. Habitus from one representative specimen in dorsal and ventral views. F. Results from EDX analyses: elemental proportions, given in atomic percent, for central, lateral, and marginal teeth. Proposed biomineralization categories for each tooth type are written in red. Scale bars: A-B, 80  $\mu\text{m}$ ; E, 1 cm.

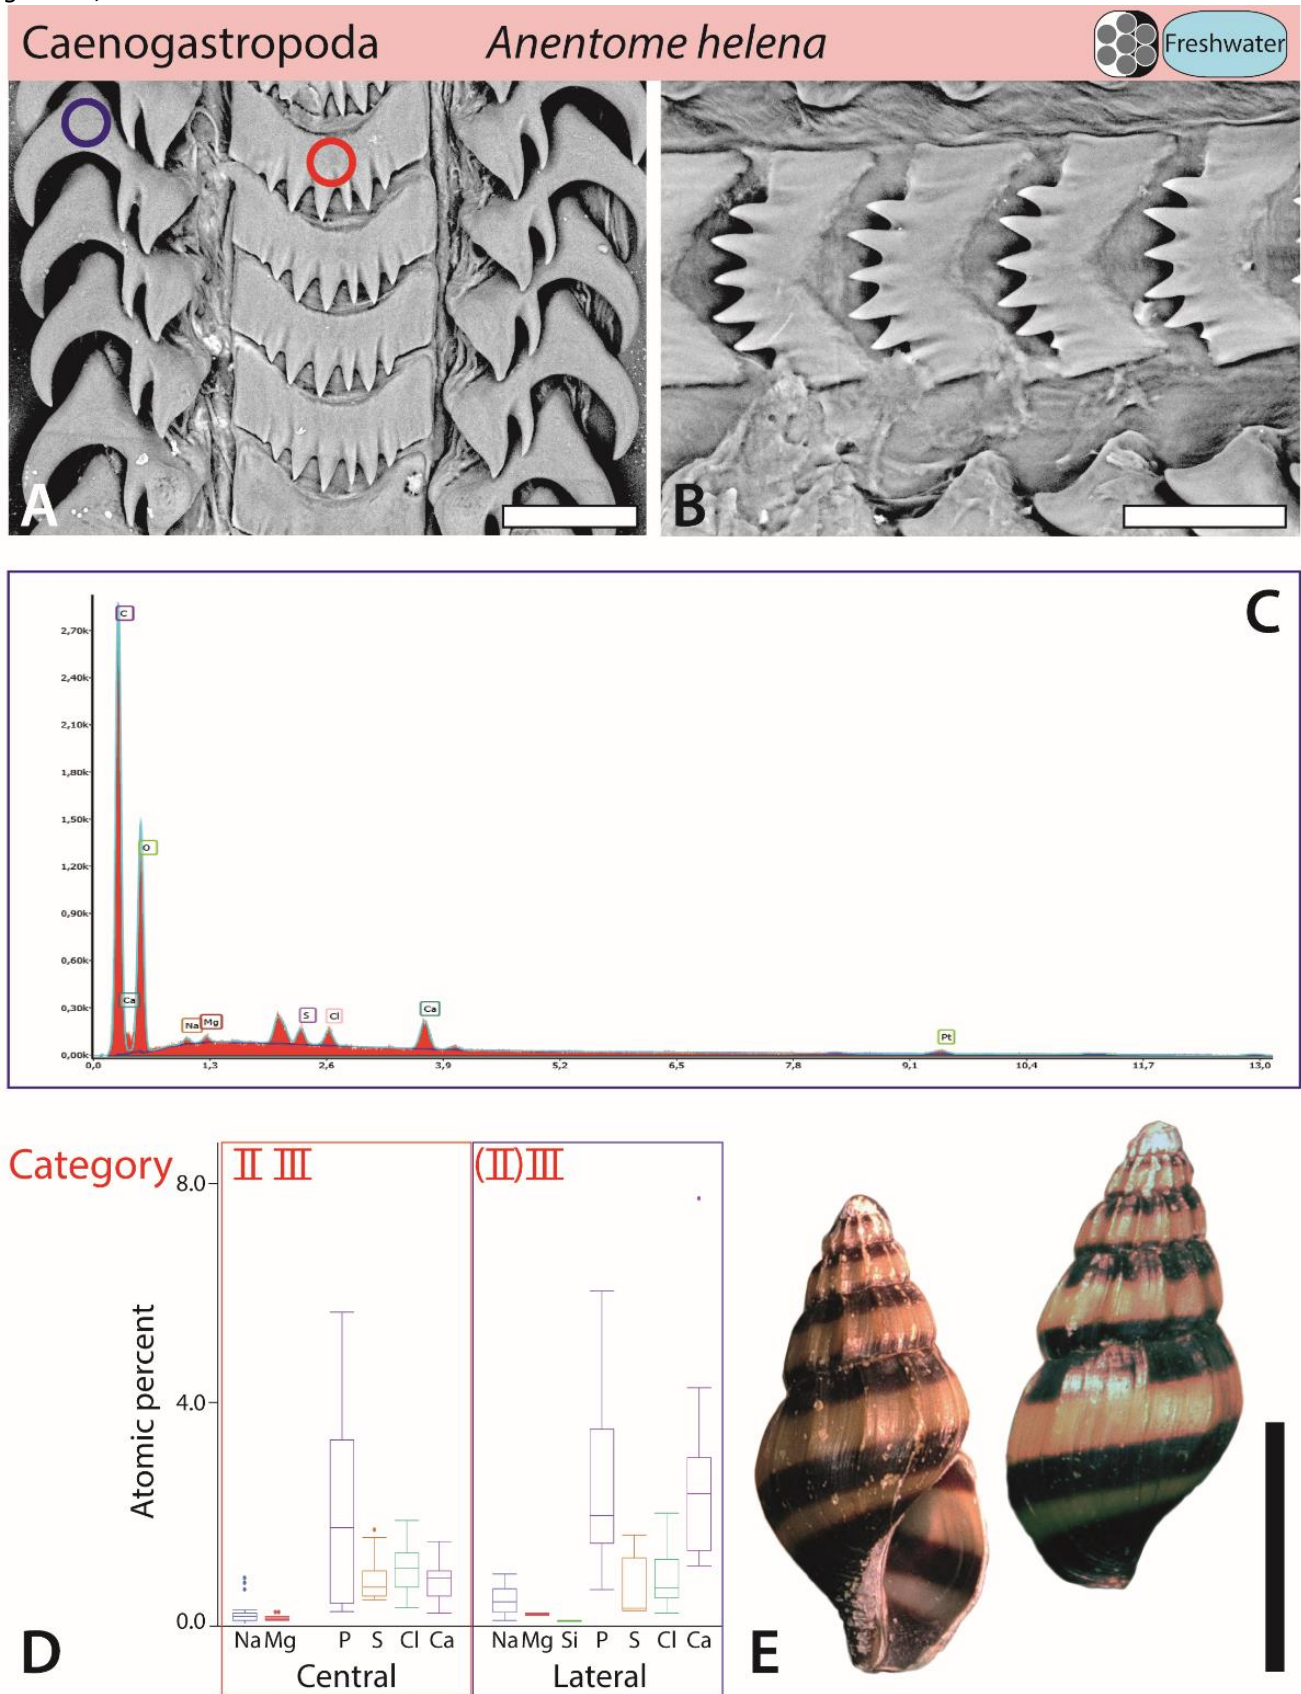

**Supplementary Figure 18. *Anentome helena*:** A-B. SEM images of the working zone of one representative radula. The circles indicate the area of the EDX analysis: blue, lateral; red, central teeth. C. Representative EDX spectrum of the lateral tooth. D. Results from EDX analyses: elemental proportions, given in atomic percent, for central and lateral teeth. Proposed biomimneralization categories for each tooth type are written in red. E. Habitus from one representative specimen in dorsal and ventral views. Scale bars: A-B, 40 μm; E, 1 cm.

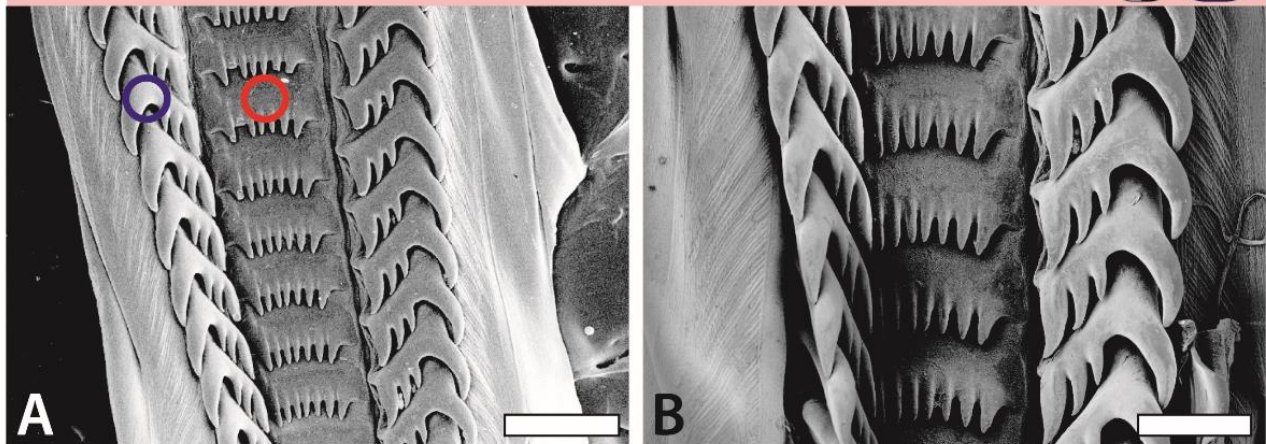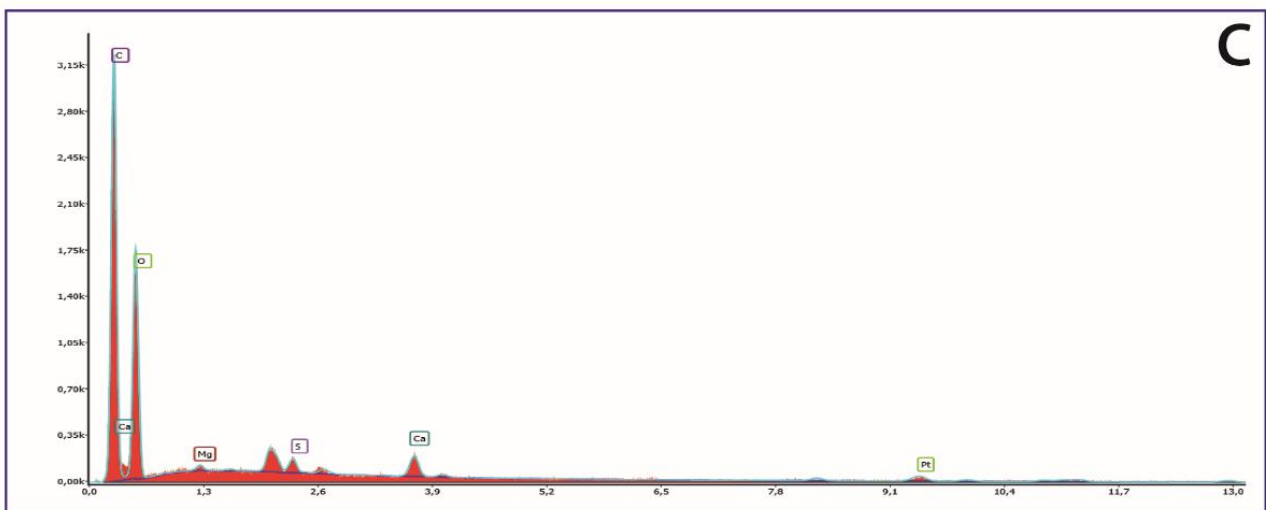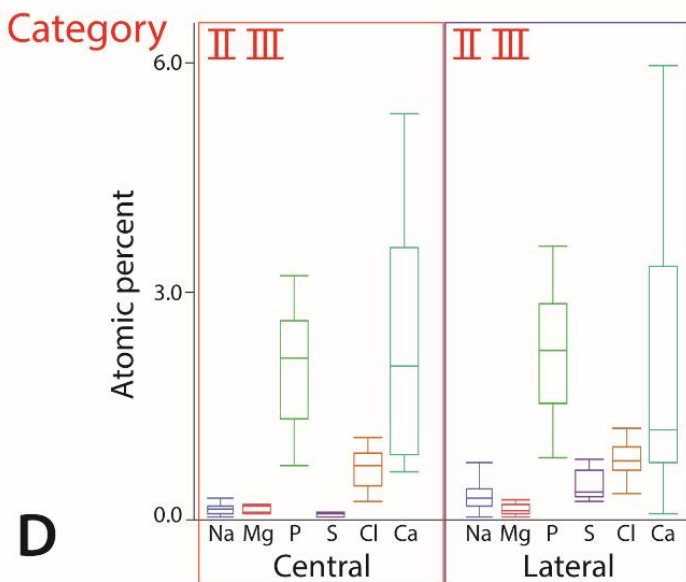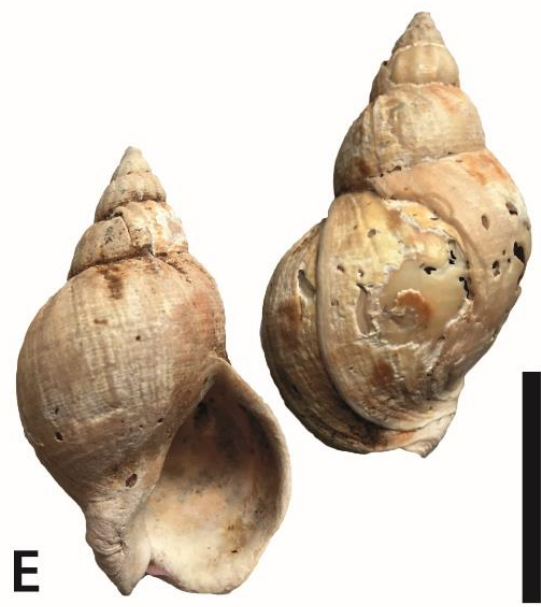

**Supplementary Figure 19. *Buccinum undatum*:** A-B. SEM images of the working zone of one representative radula. The circles indicate the area of the EDX analysis: blue, lateral; red, central teeth. C. Representative EDX spectrum of the lateral tooth. D. Results from EDX analyses: elemental proportions, given in atomic percent, for central and lateral teeth. Proposed biomimneralization categories for each tooth type are written in red. E. Habitus from one representative specimen in dorsal and ventral views. Scale bars: A, 500  $\mu$ m; B, 300  $\mu$ m; E, 3 cm.

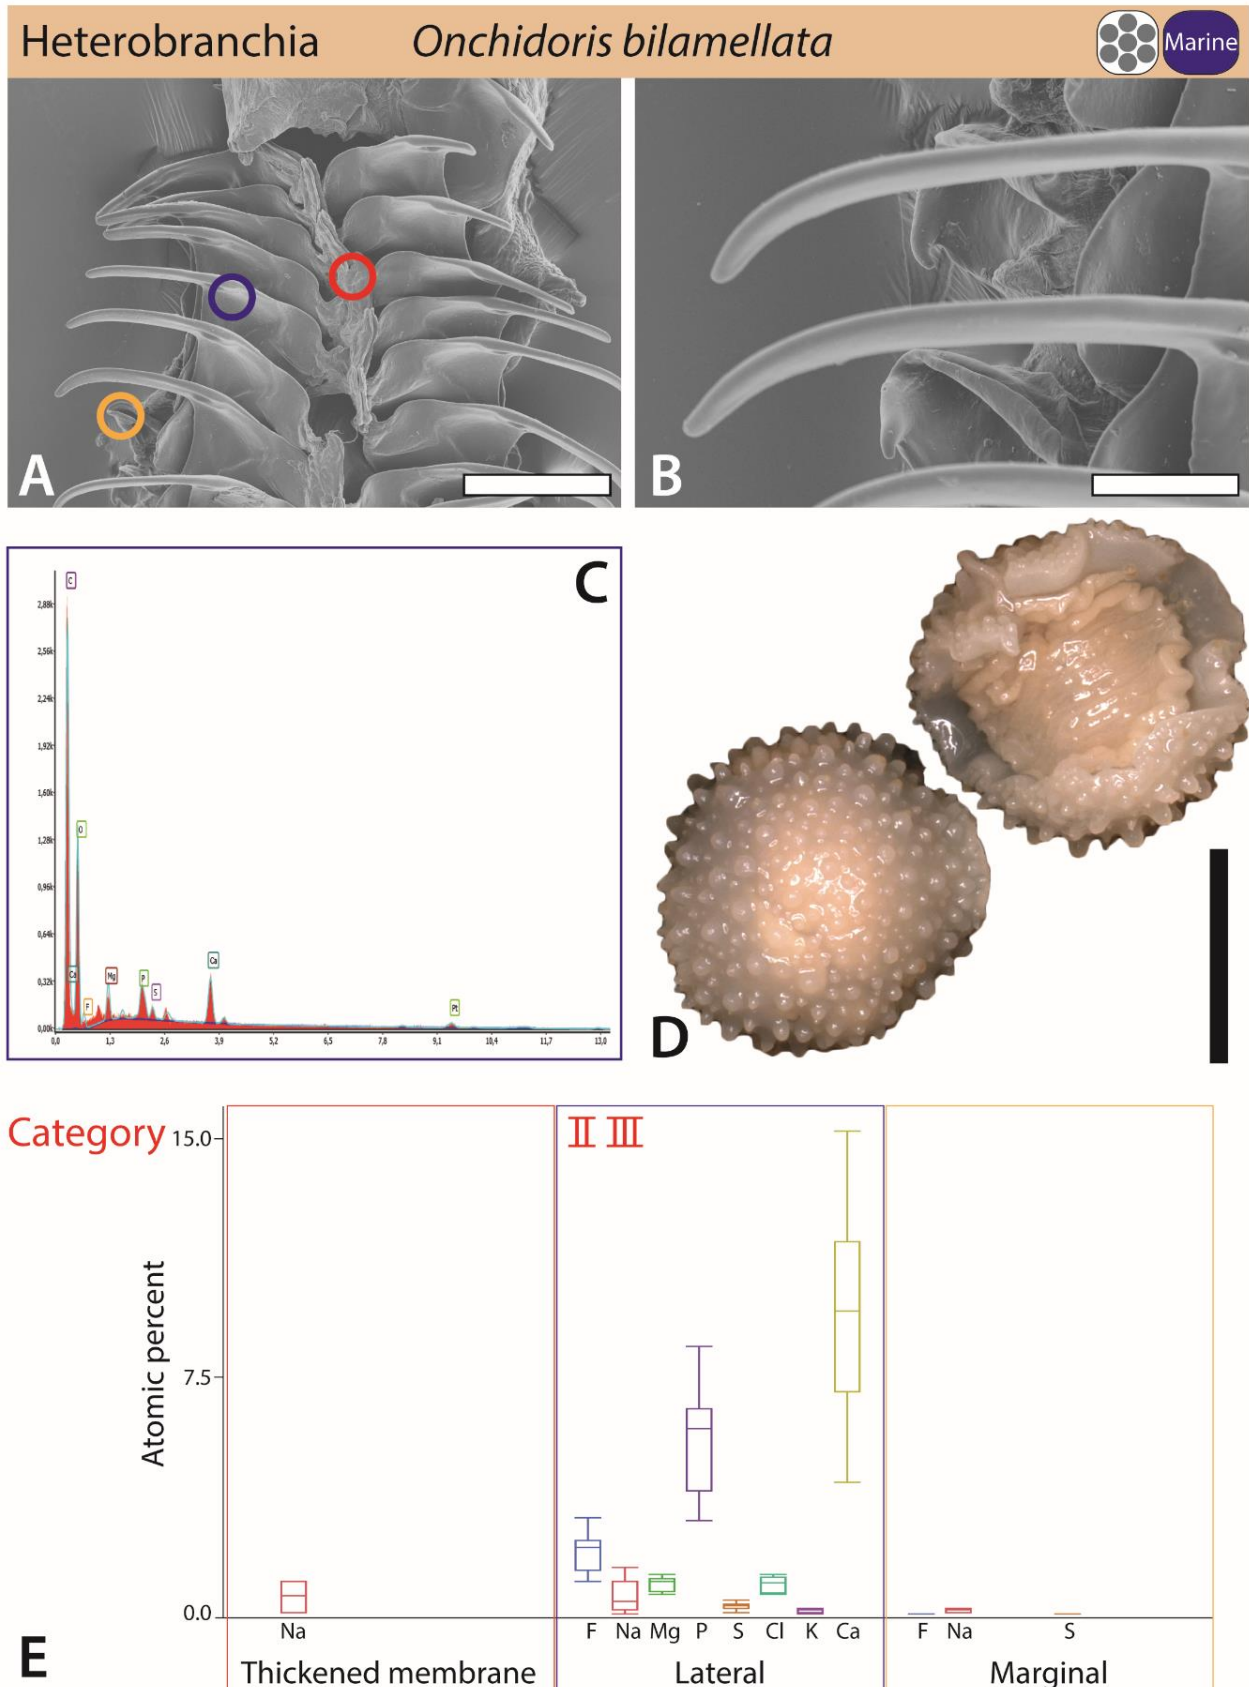

**Supplementary Figure 20. *Onchidoris bilamellata*:** A-B. SEM images of the working zone of one representative radula. The circles indicate the area of the EDX analysis: yellow, marginal; blue, lateral; red, central teeth. C. Representative EDX spectrum of the lateral tooth. D. Habitus from one representative individual in dorsal and ventral views (images of living gastropods). E. Results from EDX analyses: elemental proportions, given in atomic percent, for central, lateral, and marginal teeth. Proposed biomineralization categories for each tooth type are written in red. Scale bars: A, 150  $\mu$ m; B, 40  $\mu$ m; D, 5 mm.

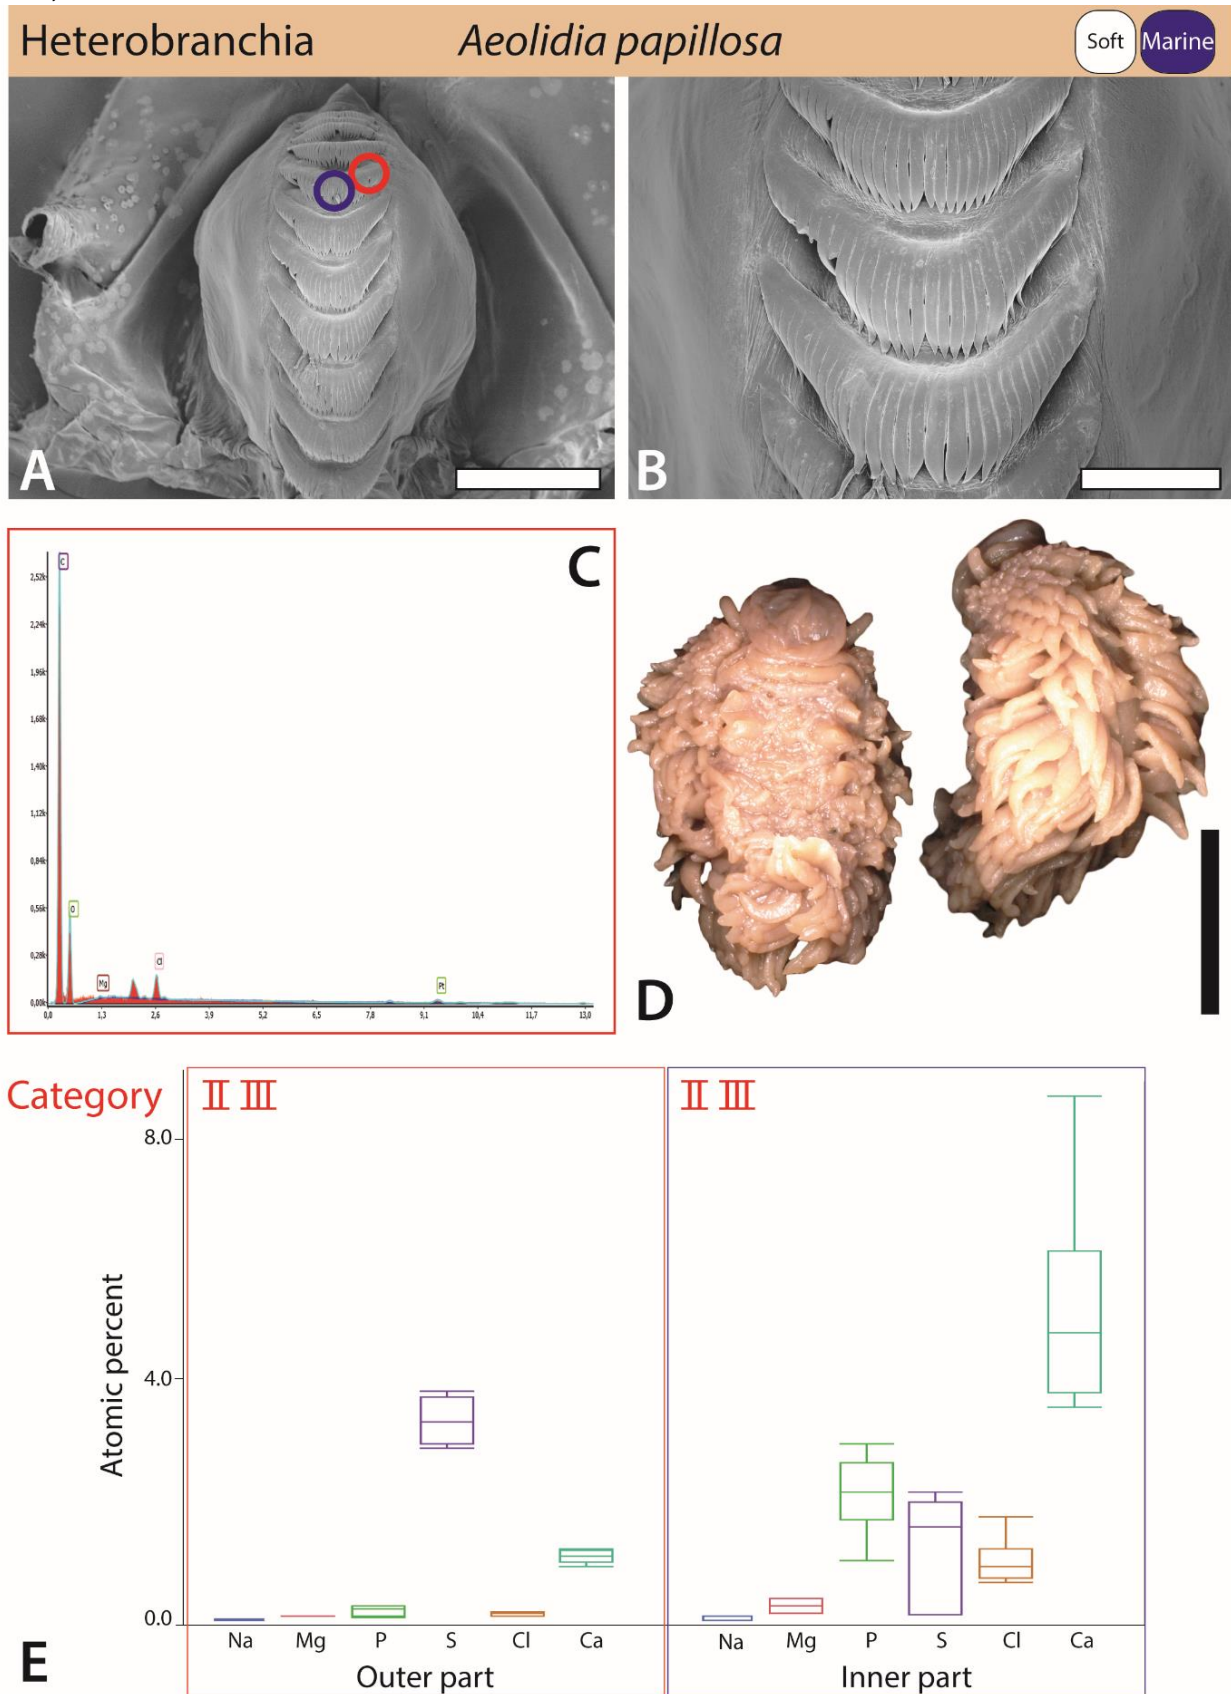

**Supplementary Figure 21. *Aeolidia papillosa*:** A-B. SEM images of the working zone of one representative radula. The circles indicate the area of the EDX analysis: blue, inner part; red, outer part. C. Representative EDX spectrum of the outer tooth part. D. Habitus from one representative specimen in dorsal and ventral views. E. Results from EDX analyses: elemental proportions, given in atomic percent, for outer and inner tooth part. Proposed biomineralization categories for each tooth part are written in red. Scale bars: A, 400  $\mu$ m; B, 150  $\mu$ m; D, 7 mm.

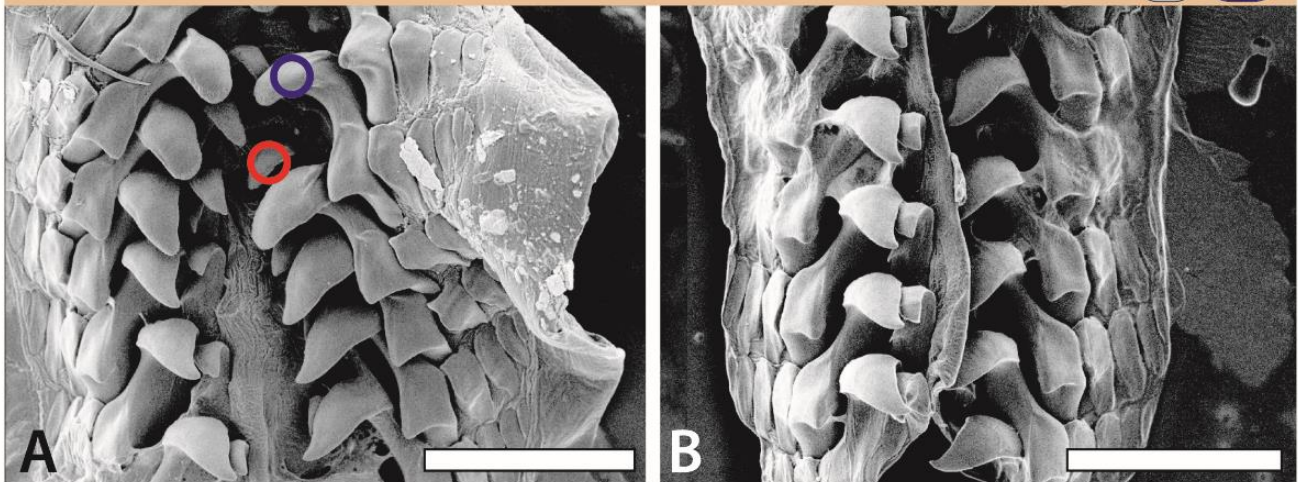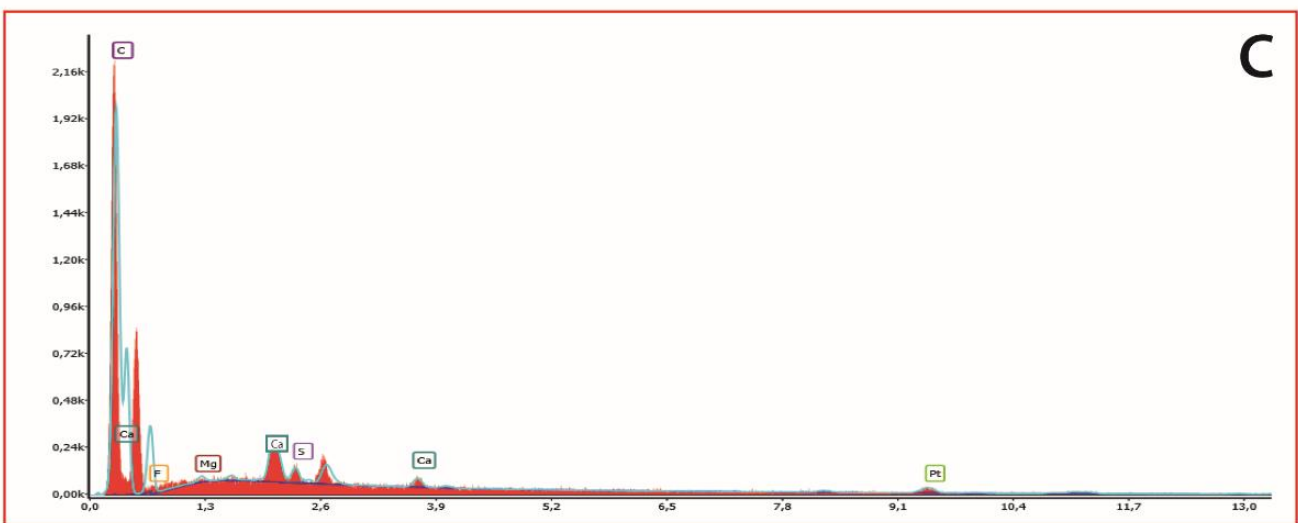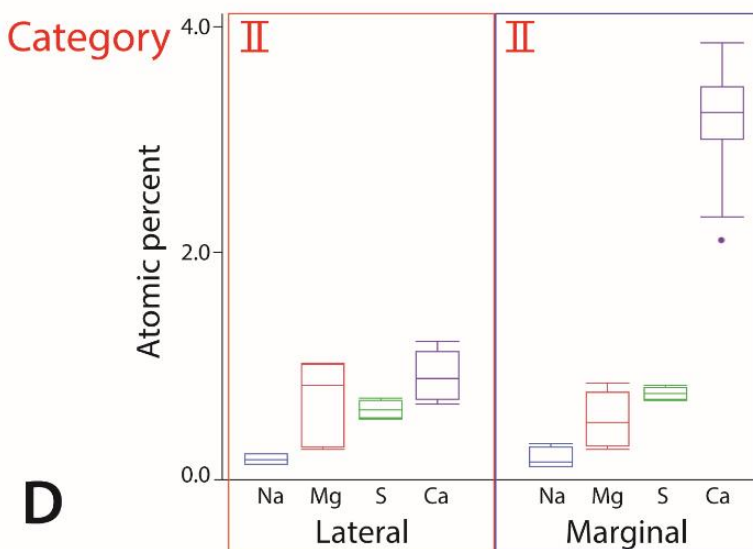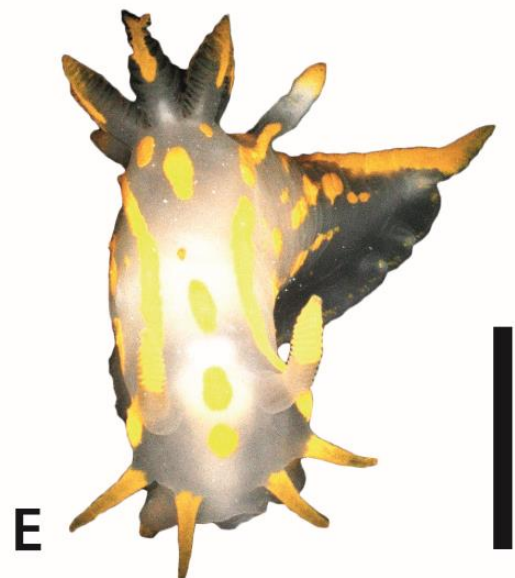

**Supplementary Figure 22. *Polycera quadrilineata*:** A-B. SEM images of the working zone of one representative radula. The circles indicate the area of the EDX analysis: red, lateral; blue, marginal teeth. C. Representative EDX spectrum of the lateral tooth. D. Results from EDX analyses: elemental proportions, given in atomic percent, for lateral and marginal teeth. Proposed biomineralization categories for each tooth type are written in red. E. Habitus from one representative individual (image of the living animal). Scale bars: A-B, 400  $\mu$ m; E, 1 cm.

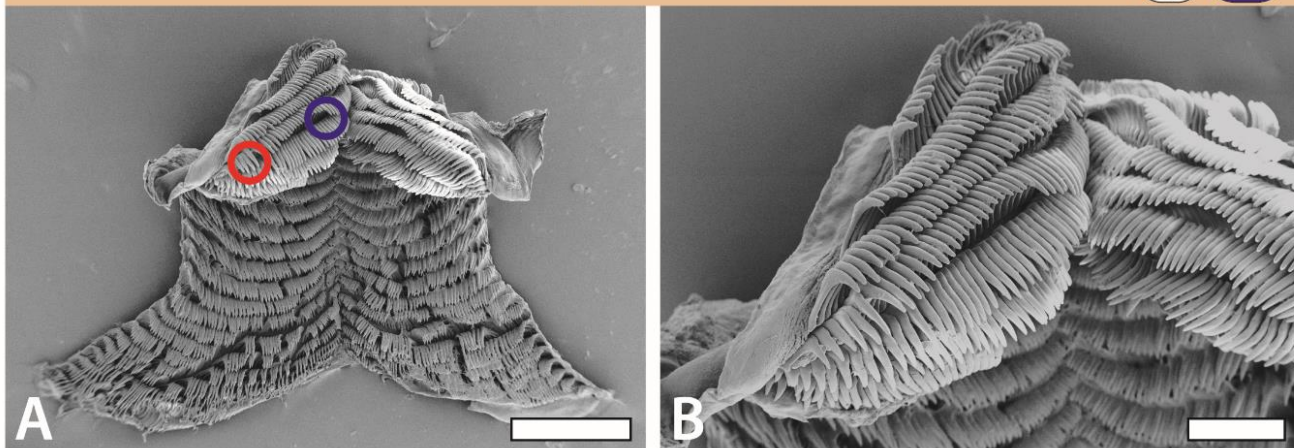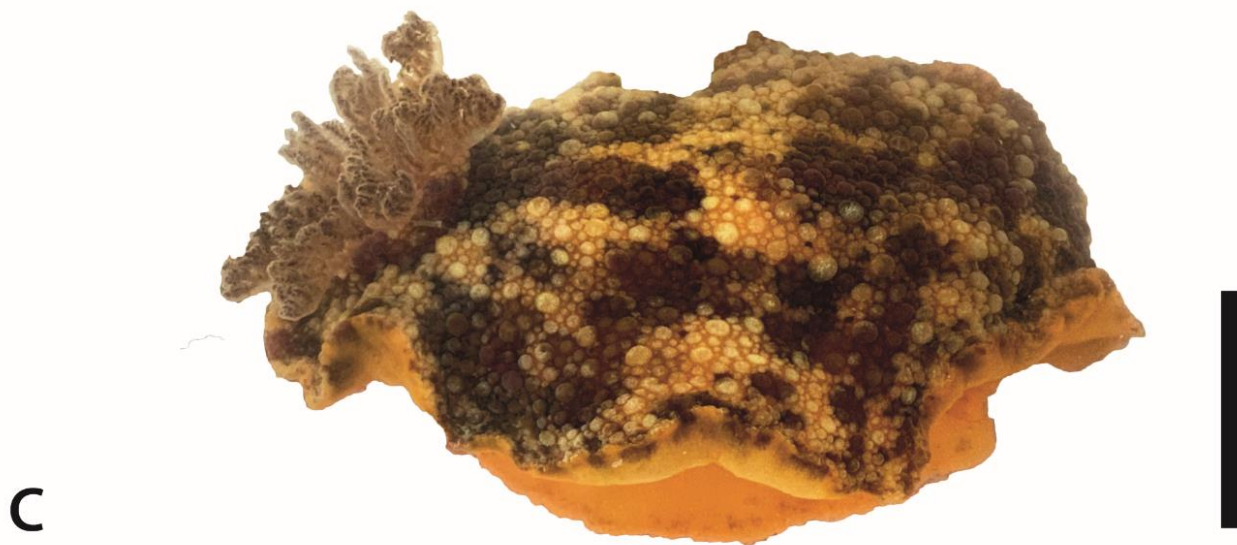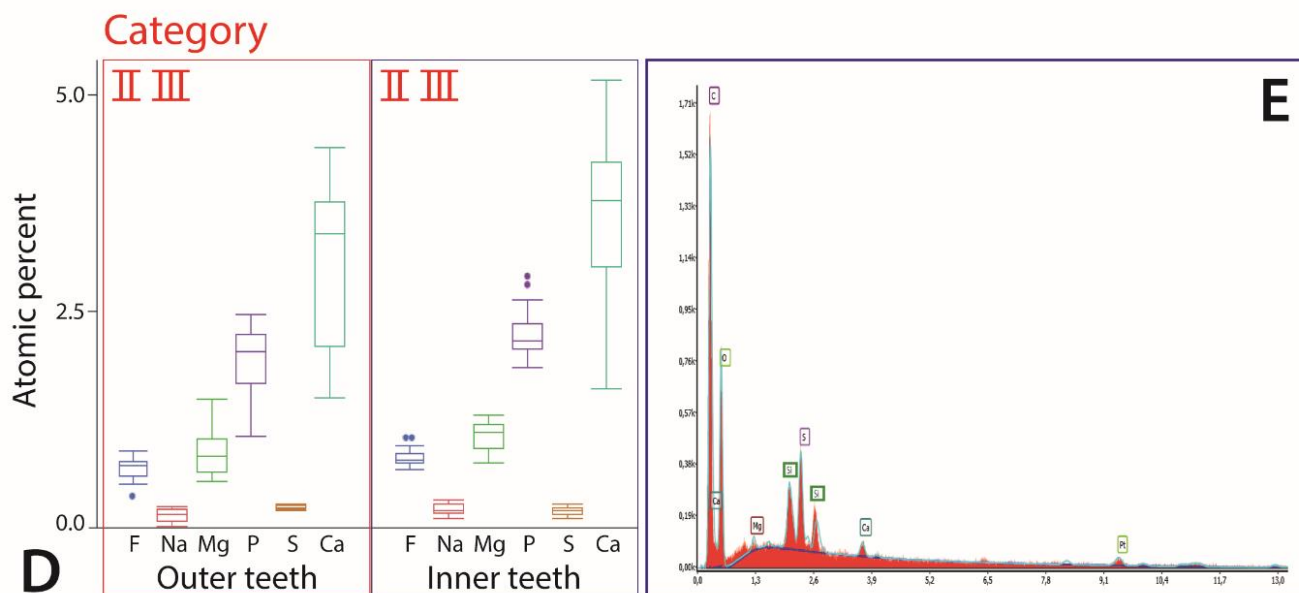

**Supplementary Figure 23. *Doris pseudoargus*:** A-B. SEM images of the working zone of one representative radula. The circles indicate the area of the EDX analysis: red, outer teeth; blue, inner teeth. C. Habitus from one representative individual (image of the living animal). D. Results from EDX analyses: elemental proportions, given in atomic percent, for outer and inner teeth. Proposed biomineralization categories for each tooth type are written in red. E. Representative EDX spectrum of the inner teeth. Scale bars: A, 900  $\mu$ m; B, 300  $\mu$ m; C, 1 cm.



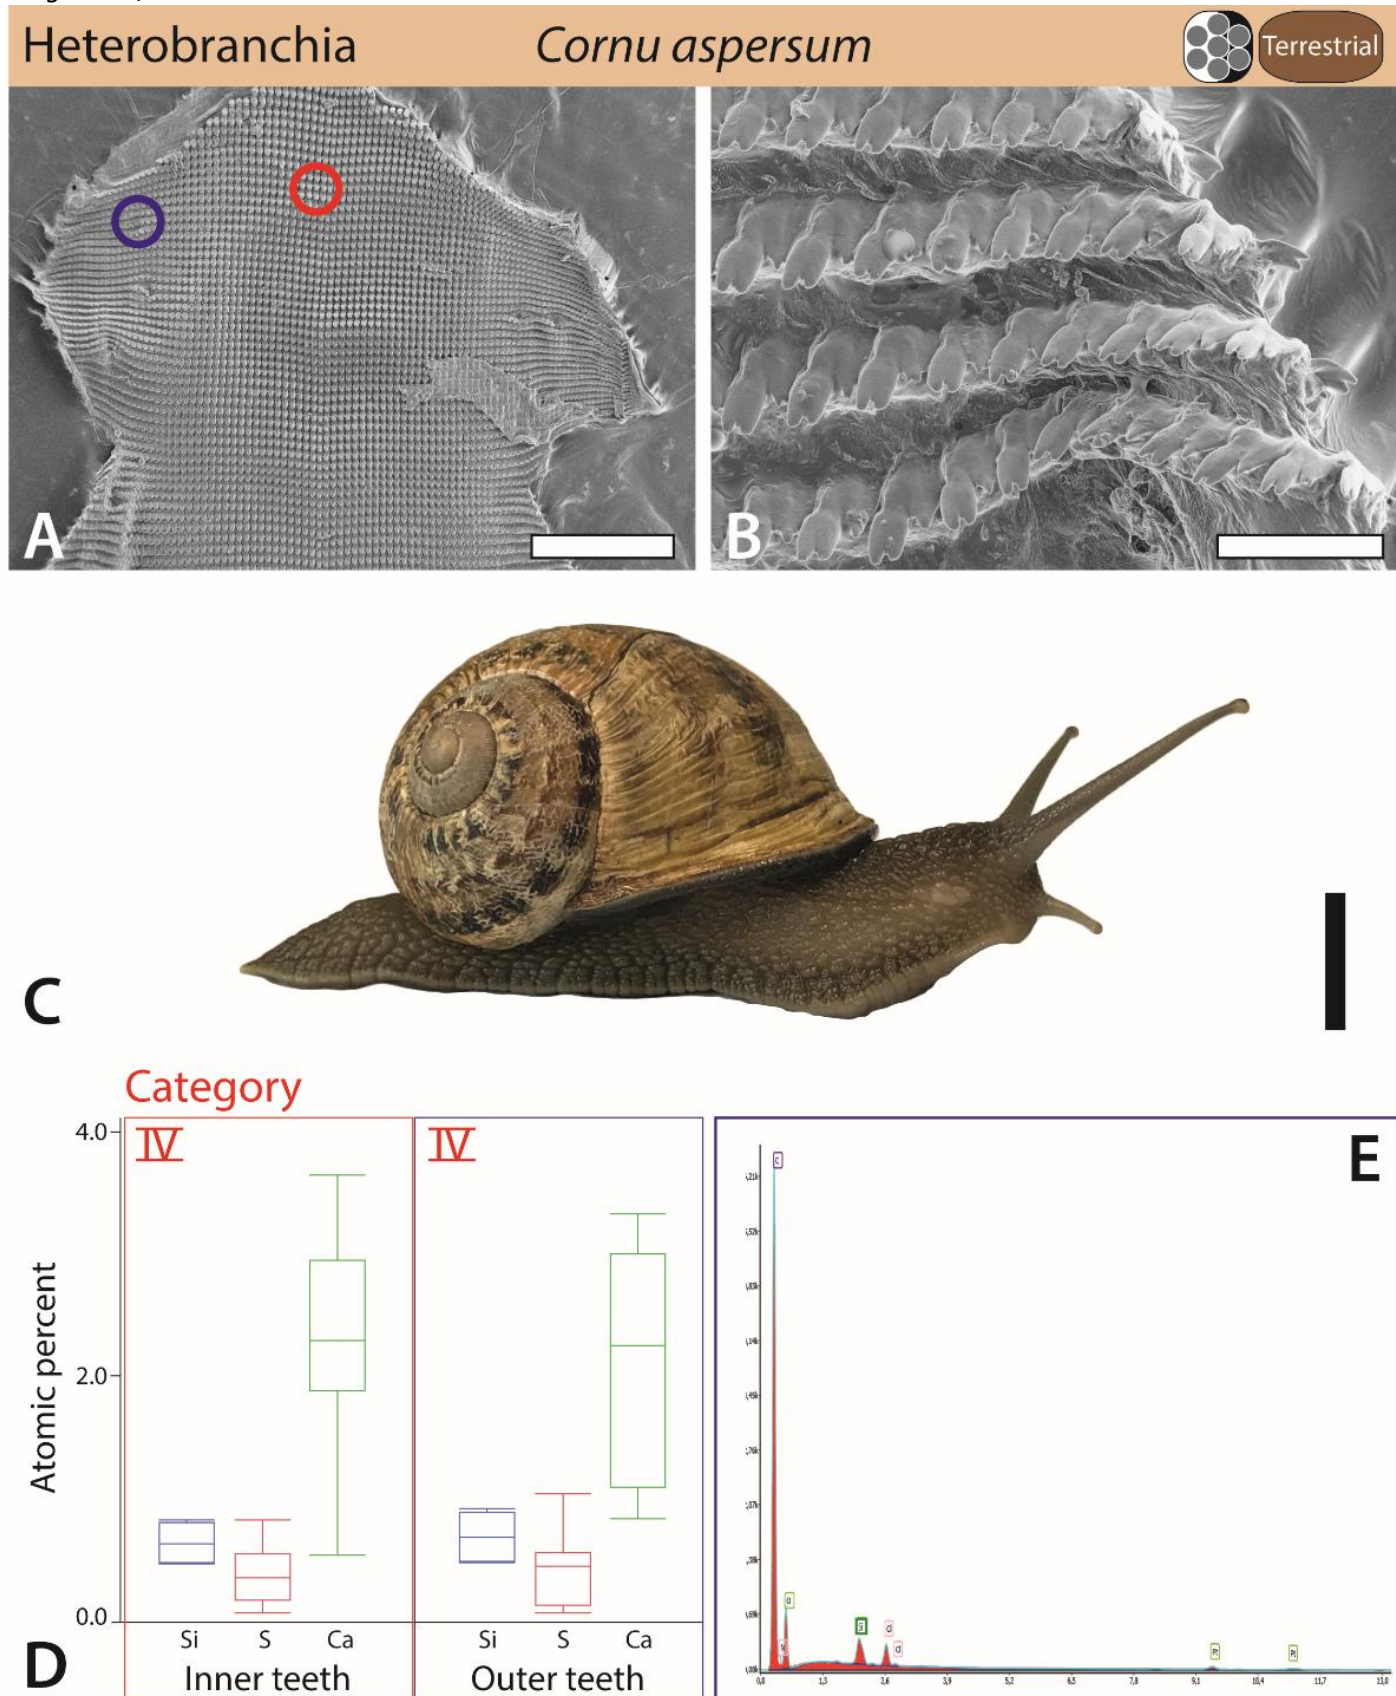

**Supplementary Figure 24. *Cornu aspersum*:** A-B. SEM images of the working zone of one representative radula. The circles indicate the area of the EDX analysis: red, inner teeth; blue, outer teeth. C. Habitus from one representative individual (image of the living animal). D. Results from EDX analyses: elemental proportions, given in atomic percent, for inner and outer teeth. Proposed biomineralization categories for each tooth type are written in red. E. Representative EDX spectrum of outer teeth. Scale bars: A, 800  $\mu\text{m}$ ; B, 60  $\mu\text{m}$ ; C, 1 cm.

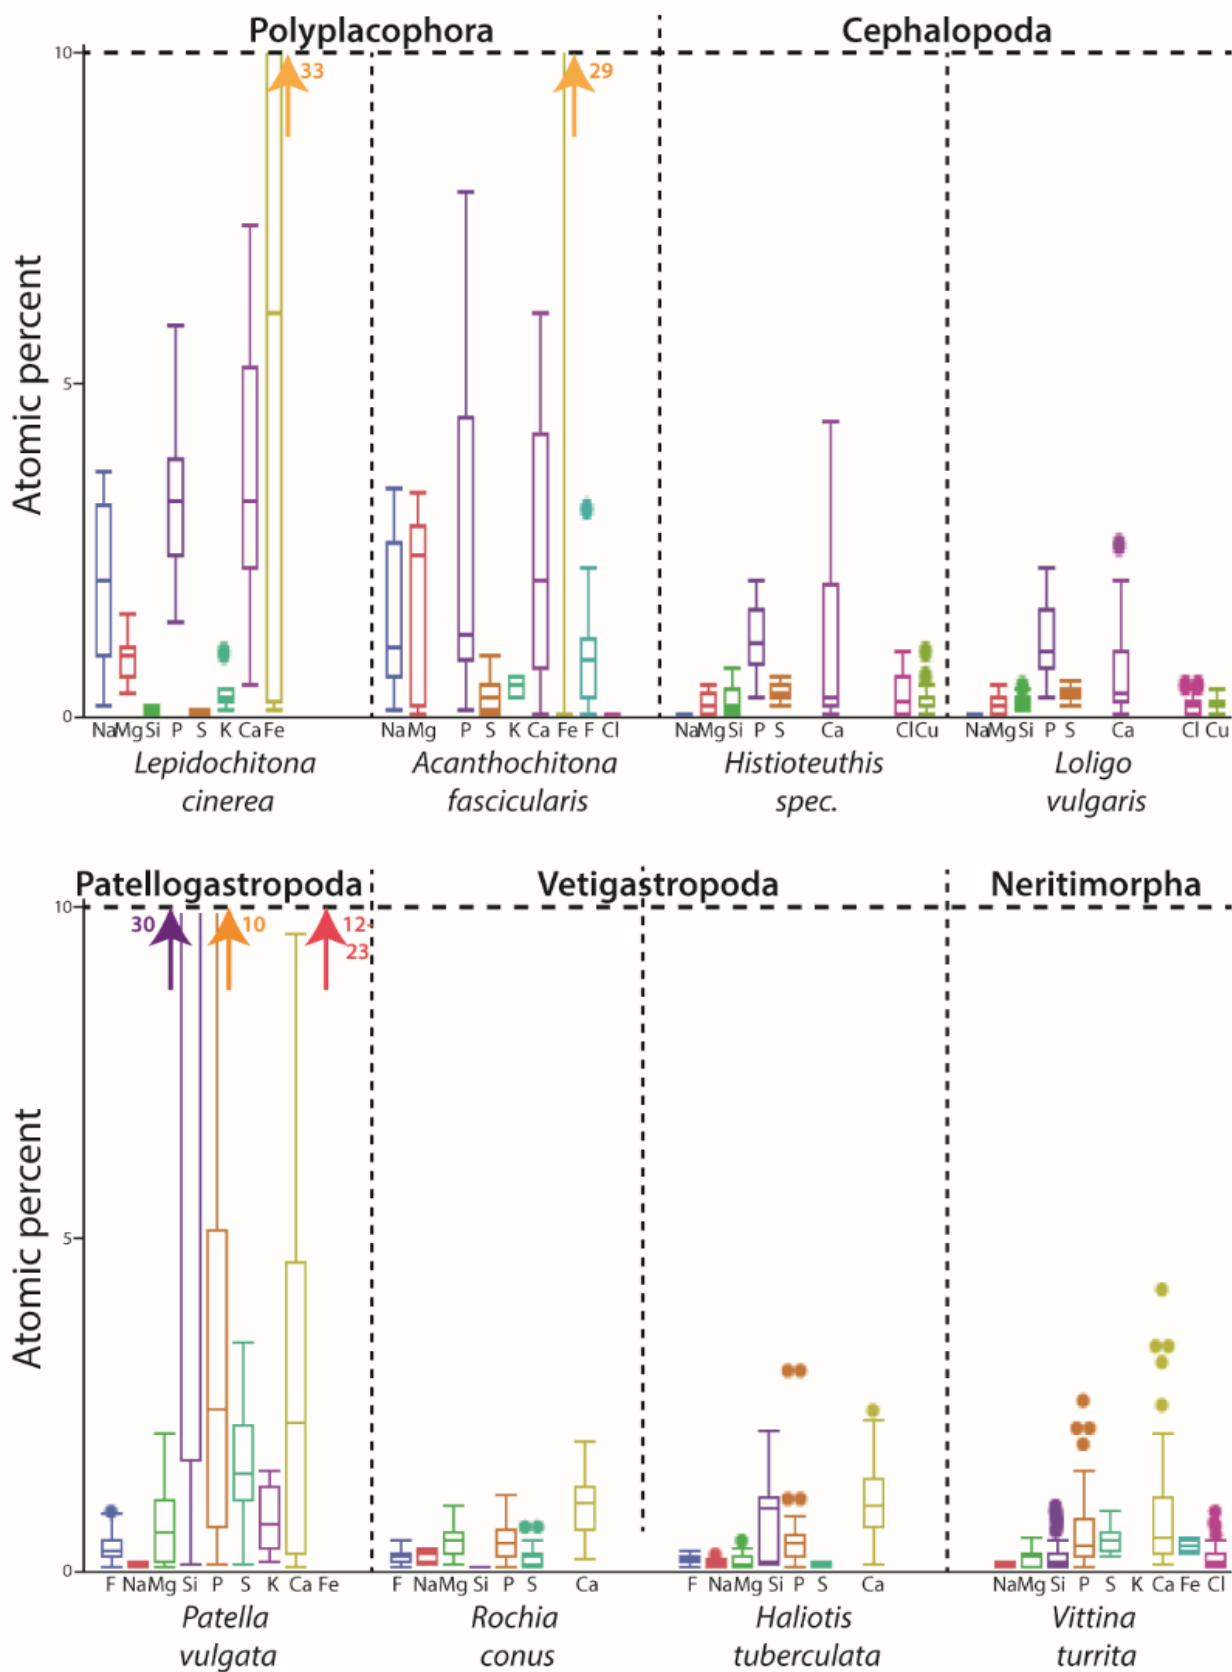

**Supplementary Figure 25.** Results from EDX analyses, given in atomic percent, summarized for each species. To enable comparison, the scale is identical to the scales in Supplementary Figures 26 and 27.

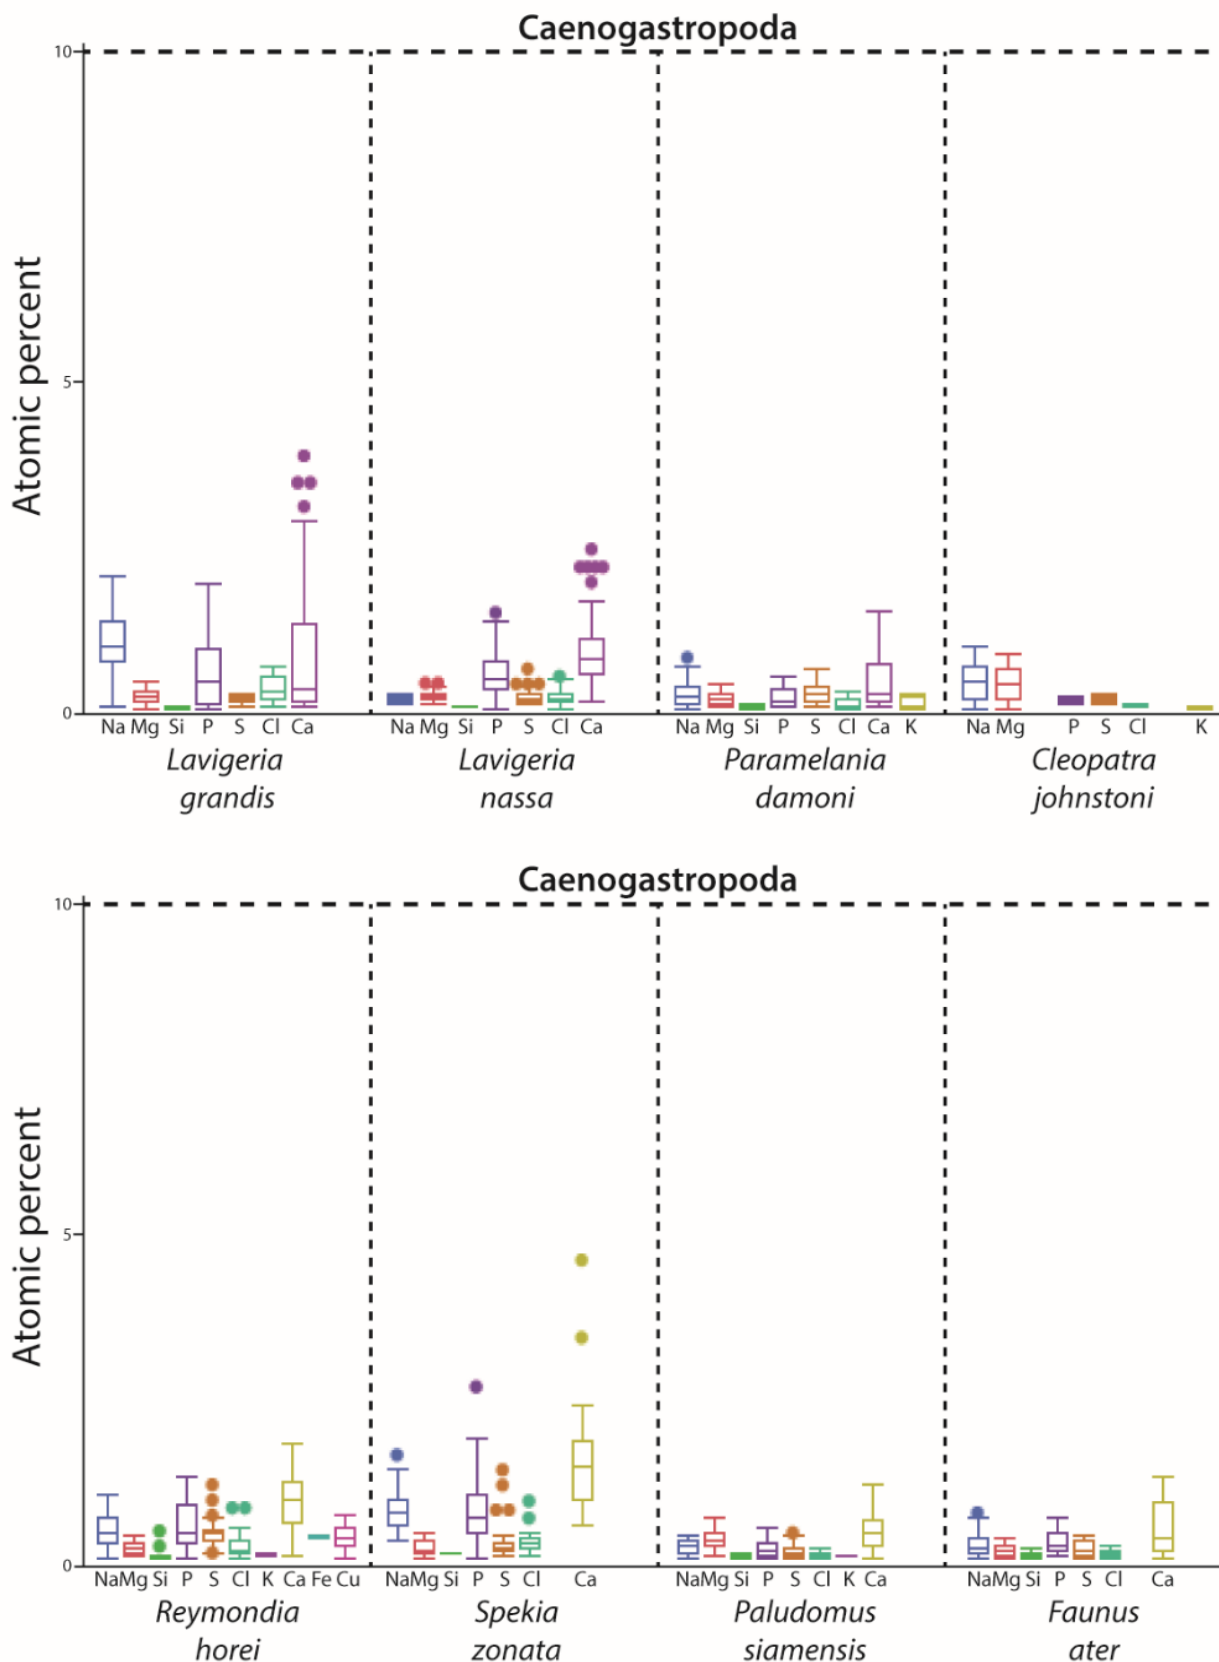

**Supplementary Figure 26.** Results from EDX analyses, given in atomic percent, summarized for each species. To enable comparison, the scale is identical to the scales in Supplementary Figures 25 and 27.

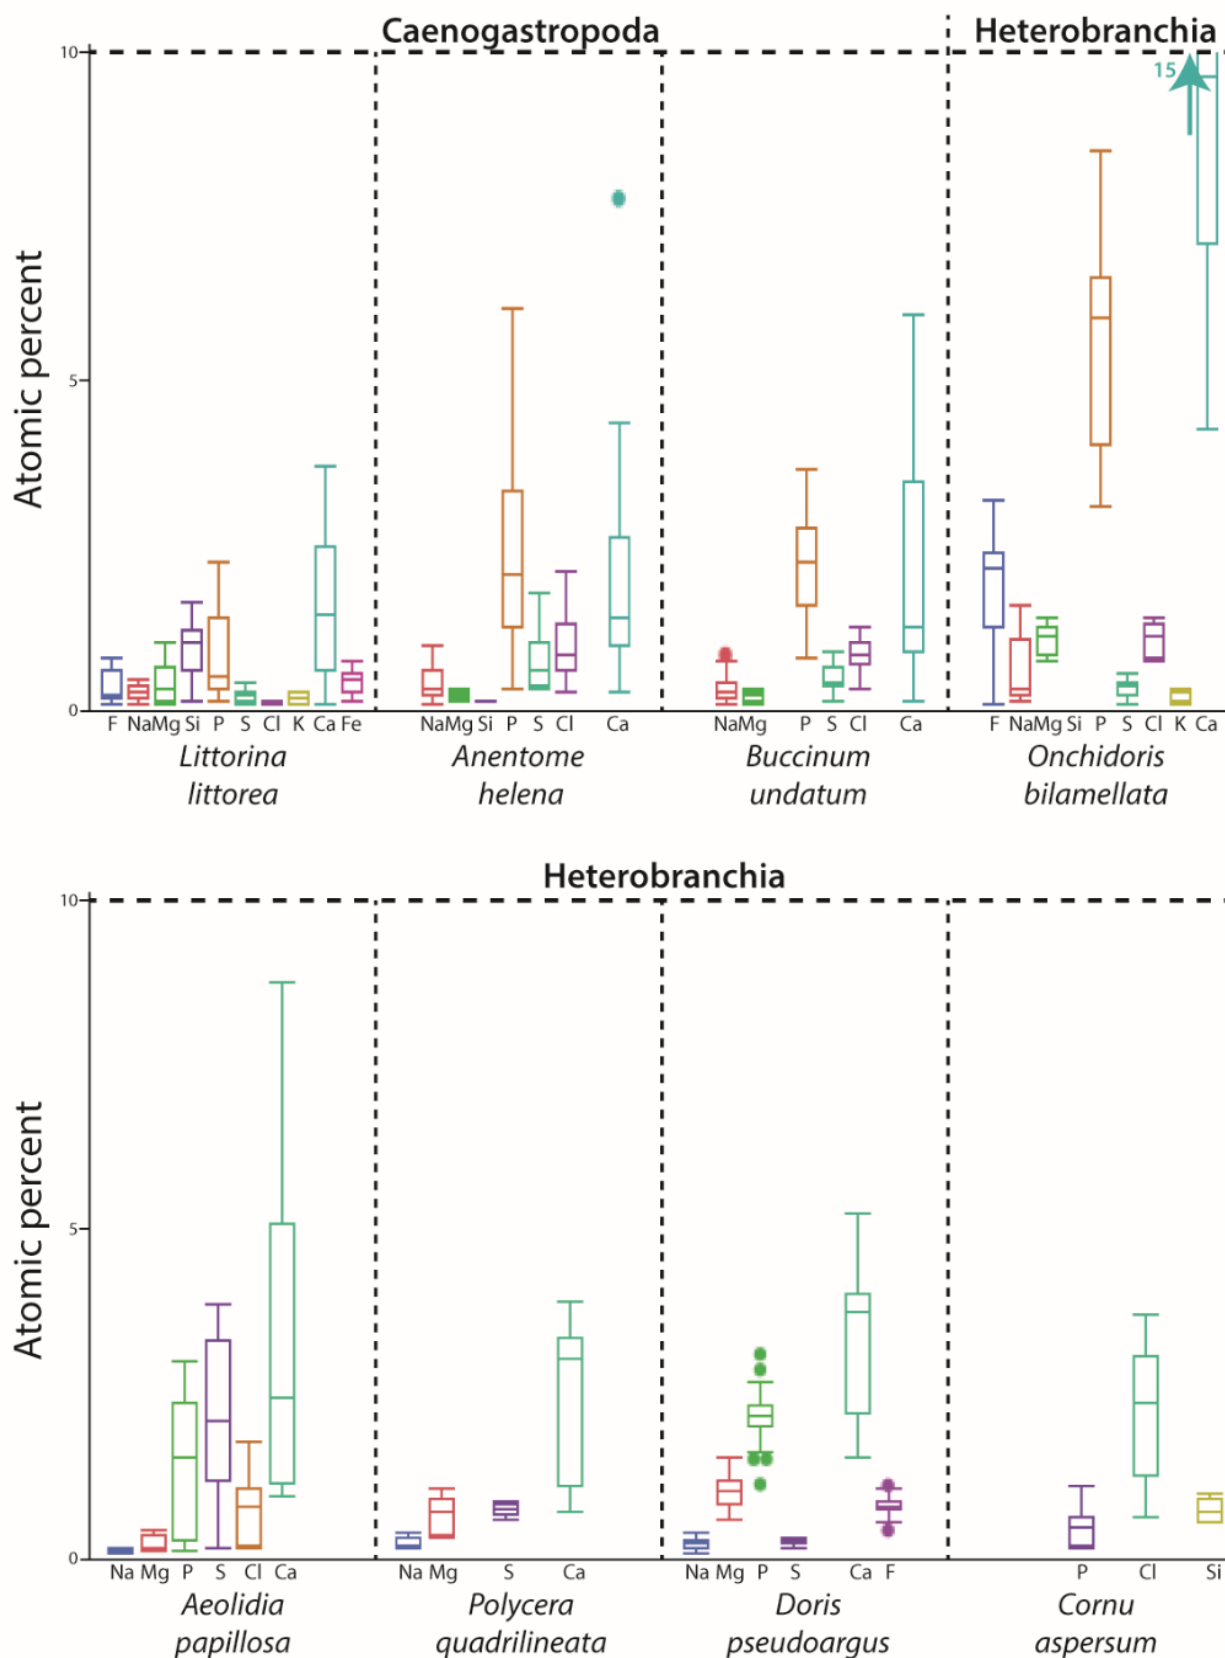

**Supplementary Figure 27.** Results from EDX analyses, given in atomic percent, summarized for each species. To enable comparison, the scale is identical to the scales in Supplementary Figures 25 and 26.

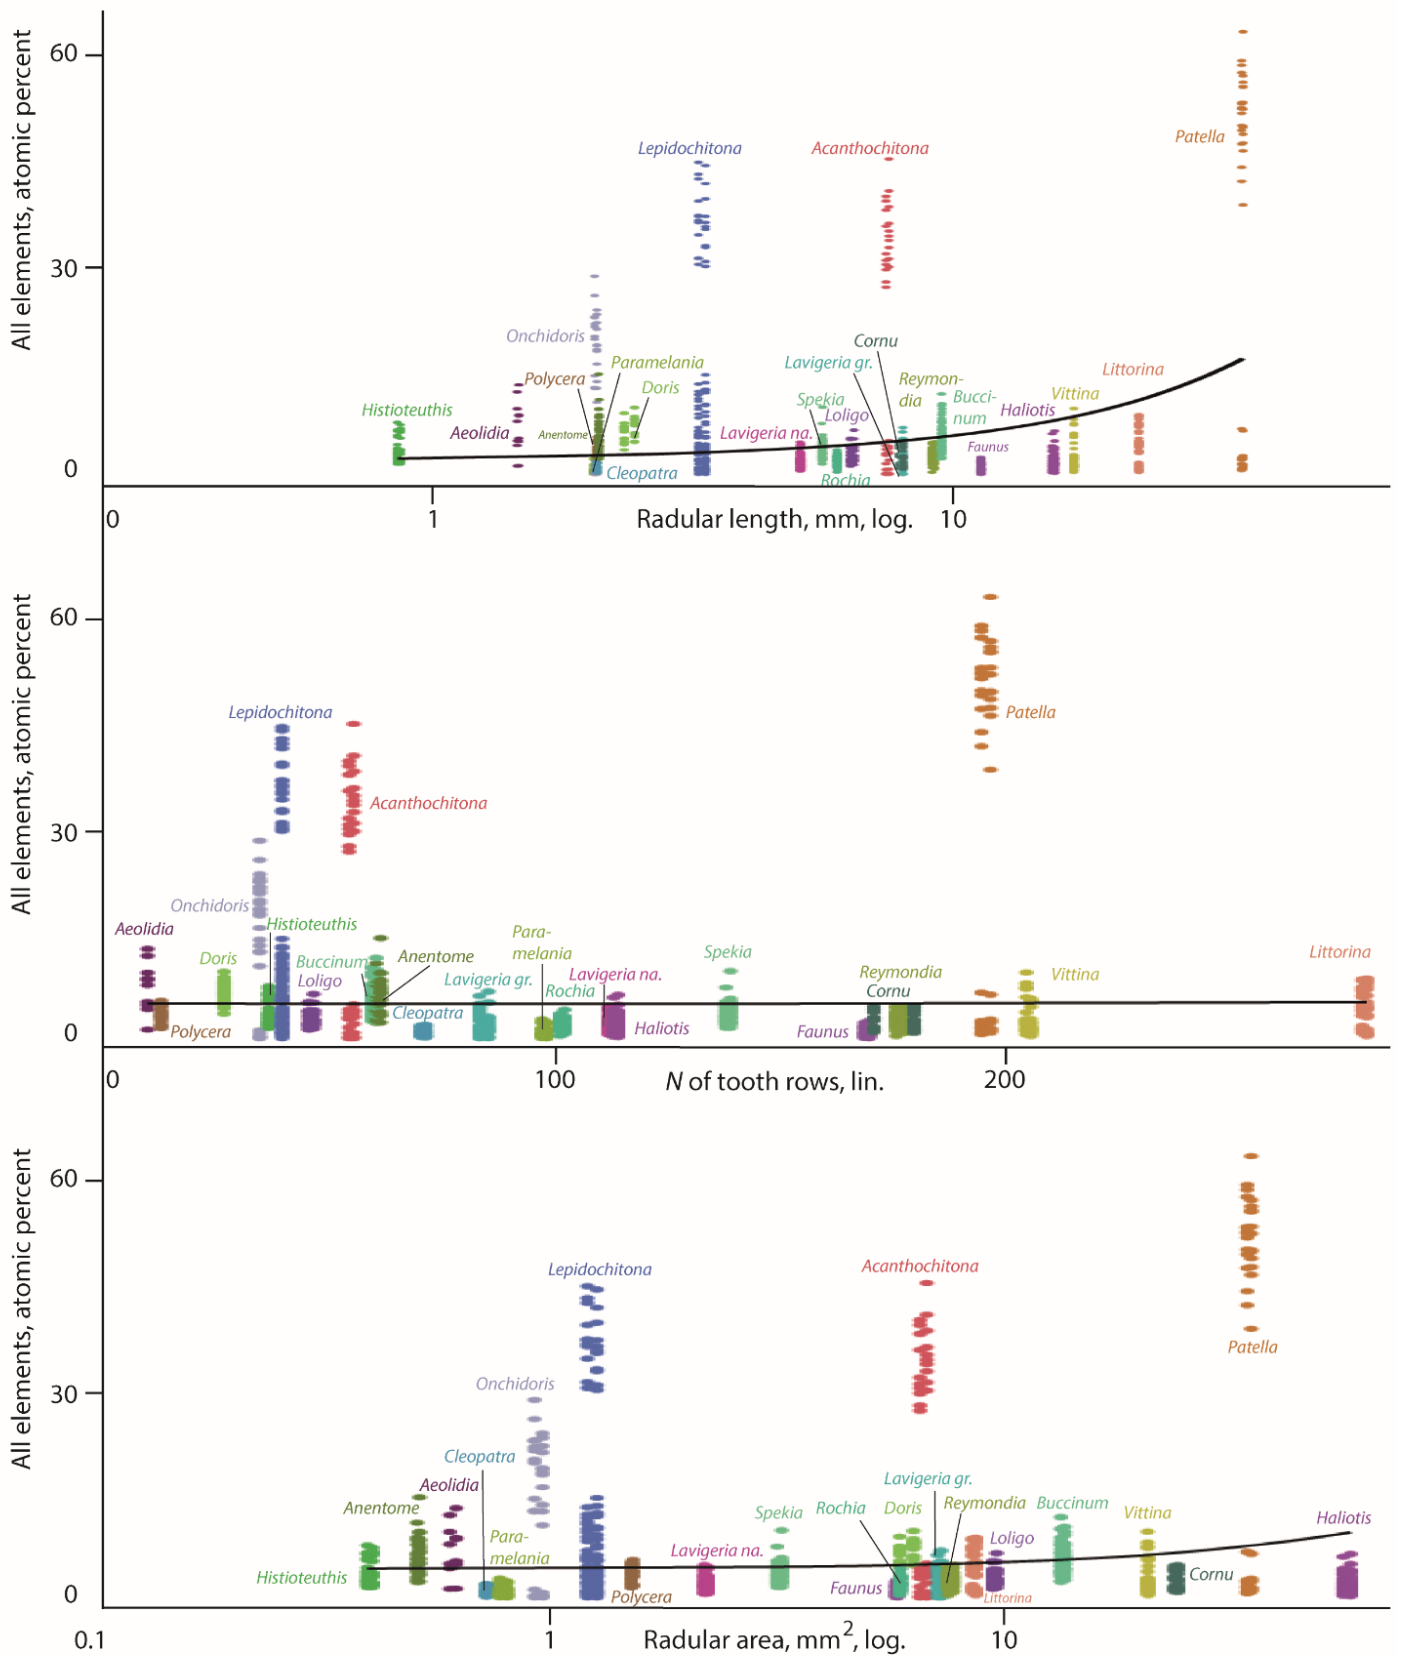

**Supplementary Figure 28.** Radular parameters (area, length, quantity of tooth rows) plotted against the proportions of all elements studied.

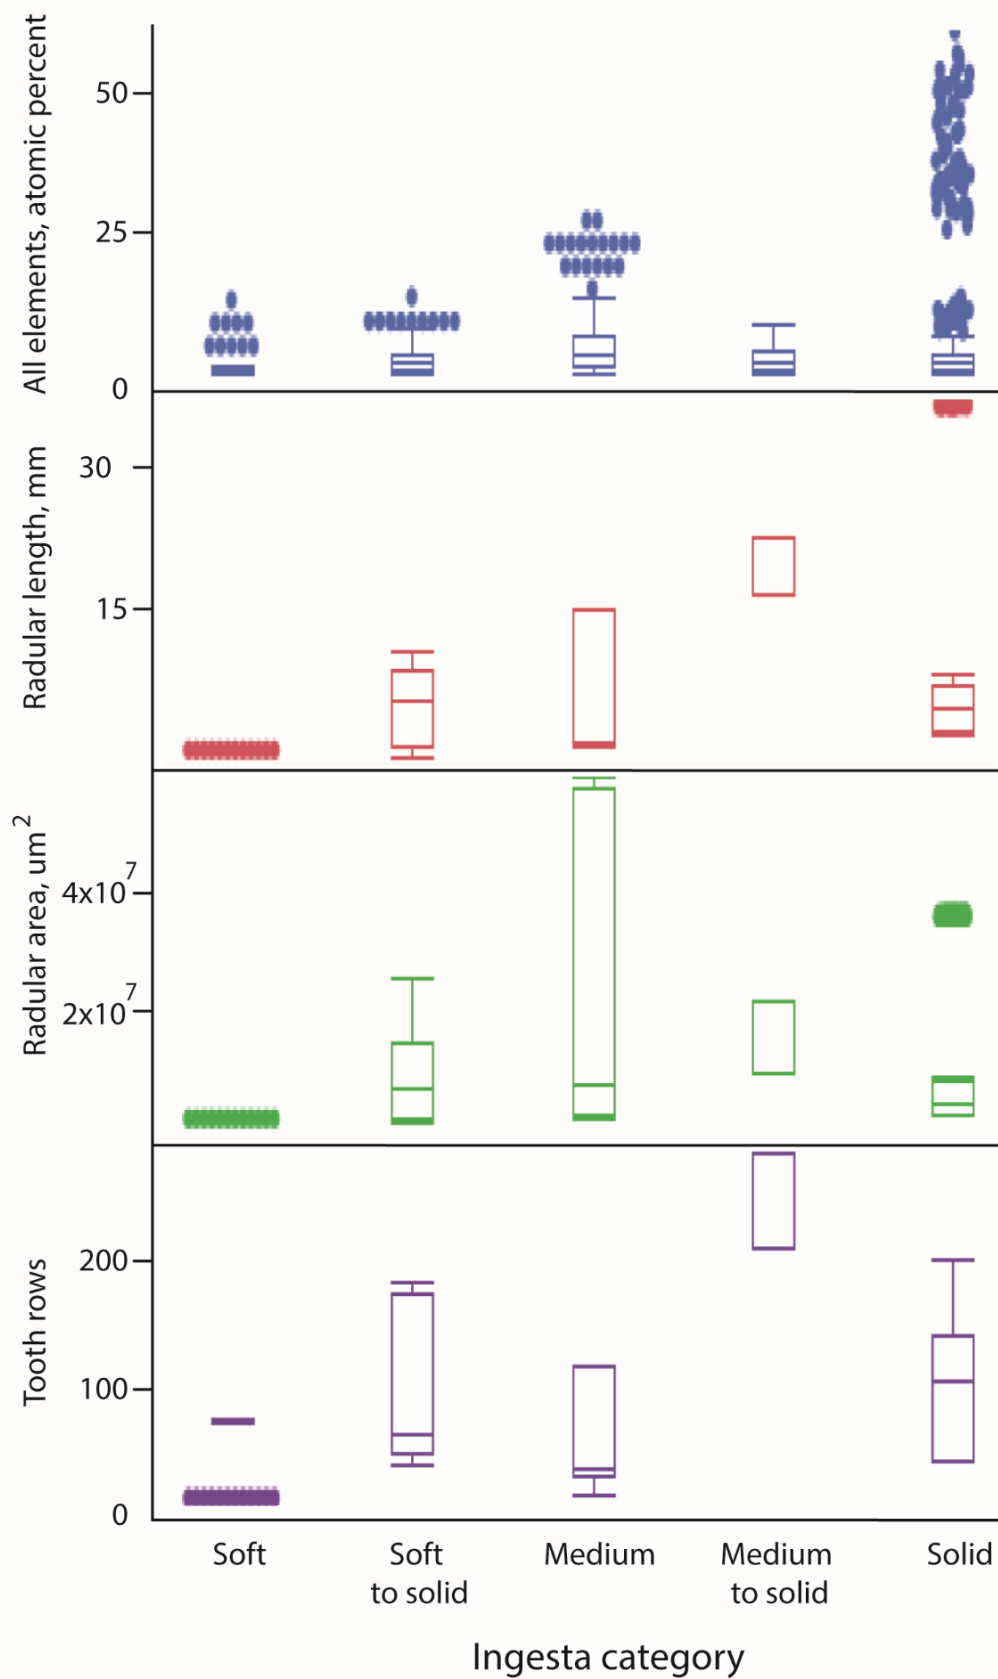

**Supplementary Figure 29.** Ingesta categories plotted against radular parameters (area, length, quantity of tooth rows) and the proportions of all elements studied.

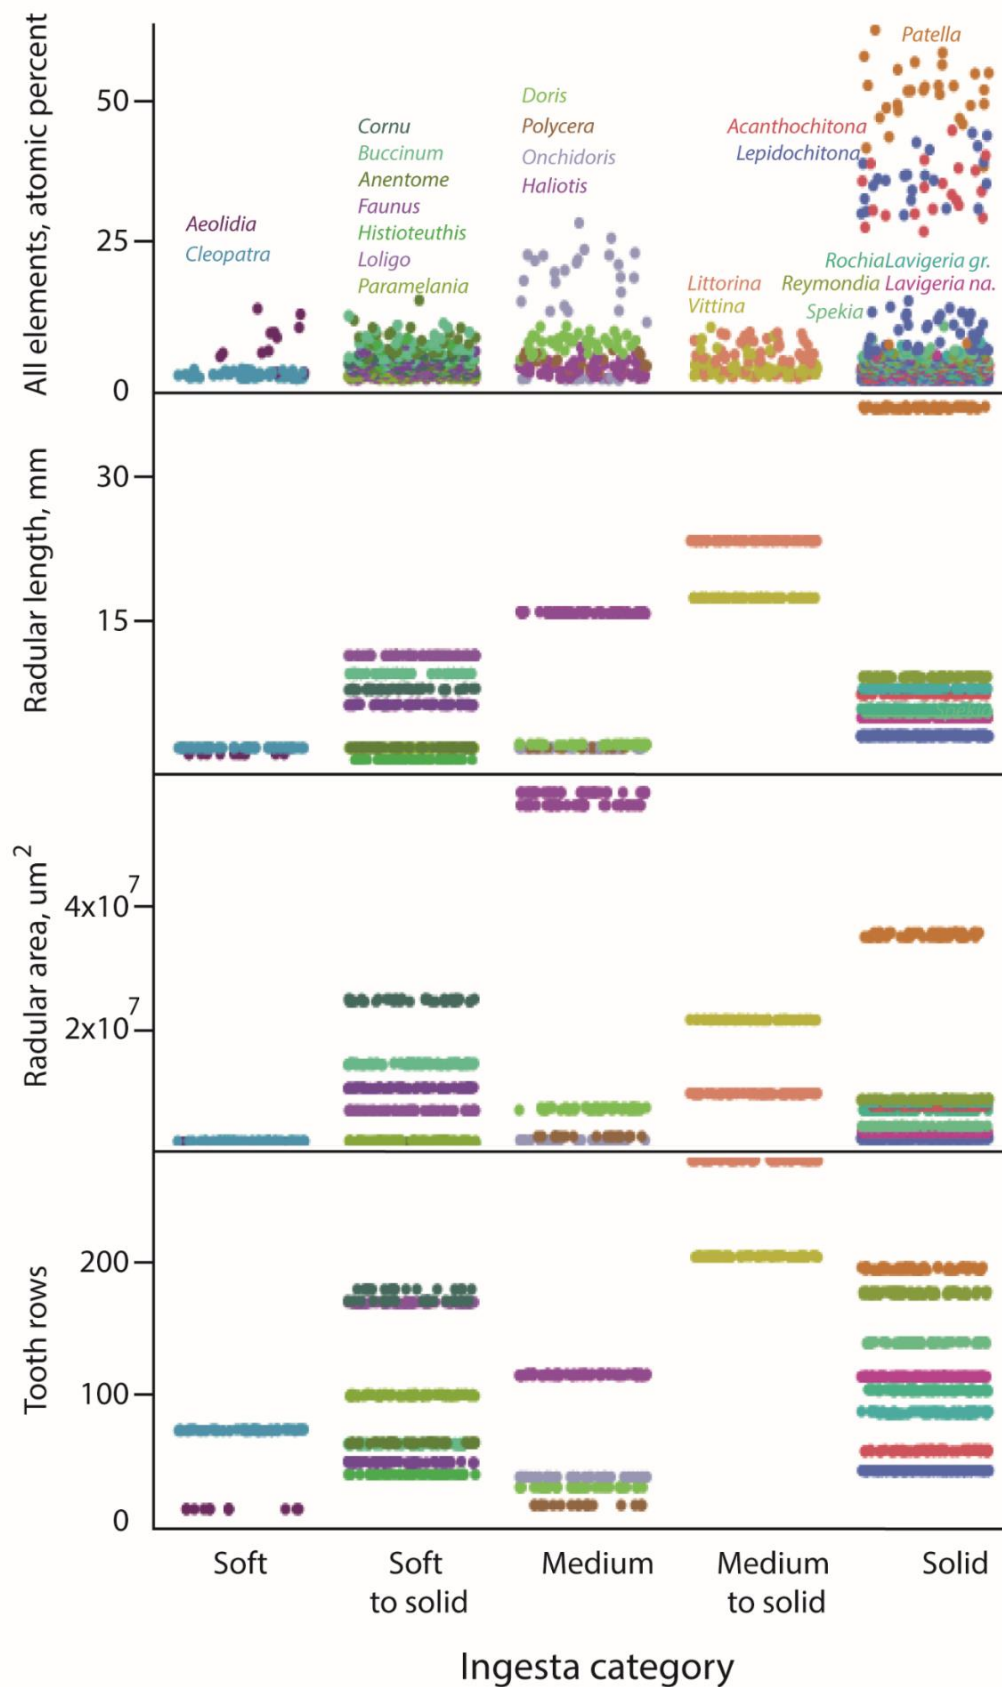

**Supplementary Figure 30.** Ingesta categories plotted against radular parameters (area, length, quantity of tooth rows) and the proportions of all elements studied. Here, the data on individual species can be seen.

**Supplementary Table 1.** For all species together: Mean, given in atomic percent, SD, and N for the individual elements studied. N, quantity of teeth that contain the element.

| Element | Mean, atomic % | SD    | N (overall N = 1448 studied teeth) |
|---------|----------------|-------|------------------------------------|
| Fe      | 9.14           | 10.41 | 182                                |
| Si      | 1.97           | 5.76  | 365                                |
| Ca      | 1.72           | 1.95  | 1220                               |
| P       | 1.16           | 1.50  | 974                                |
| F       | 0.48           | 0.60  | 336                                |
| Na      | 0.39           | 0.51  | 619                                |
| Mg      | 0.36           | 0.48  | 961                                |
| S       | 0.35           | 0.44  | 831                                |
| Cl      | 0.29           | 0.32  | 638                                |
| Cu      | 0.24           | 0.16  | 146                                |
| K       | 0.19           | 0.30  | 100                                |

**Supplementary Table 2.** For each larger taxon: Sum of means, given in atomic percent, of the individual elements.

| Taxon             | Sum of means, in atomic % |
|-------------------|---------------------------|
| Patellogastropoda | 40.95 %                   |
| Polyplacophora    | 24.01 %                   |
| Heterobranchia    | 11.38 %                   |
| Caenogastropoda   | 4.40 %                    |
| Cephalopoda       | 3.15 %                    |
| Vetigastropoda    | 2.72 %                    |
| Neritimorpha      | 2.69 %                    |



**Supplementary Table 3.** Proportions of the individual elements, given in atomic percent, (mean, SD, sum of means, N) for each species. N, quantity of teeth that contain the element.

| Species                            | Tooth          | N measurements total | Element      |       |              |      |      |    |      |      |    |      |      |    |       |       |    |      |      |      |      |      |      |      |      |      |      |      |      |      |      |      |       |       |      |      |      |      |   |
|------------------------------------|----------------|----------------------|--------------|-------|--------------|------|------|----|------|------|----|------|------|----|-------|-------|----|------|------|------|------|------|------|------|------|------|------|------|------|------|------|------|-------|-------|------|------|------|------|---|
|                                    |                |                      | All elements |       |              | F    |      |    | Na   |      |    | Mg   |      |    | Si    |       |    | P    |      |      | S    |      |      | Cl   |      |      | K    |      |      | Ca   |      |      | Fe    |       |      | Cu   |      |      |   |
|                                    |                |                      | Mean         | SD    | Sum of means | Mean | SD   | N  | Mean | SD   | N  | Mean | SD   | N  | Mean  | SD    | N  | Mean | SD   | N    | Mean | SD   | N    | Mean | SD   | N    | Mean | SD   | N    | Mean | SD   | N    | Mean  | SD    | N    |      |      |      |   |
| <i>Lepidochitona cinerea</i>       | All teeth      | 212                  | 6.21         | 11.05 | 21.75        | 0.00 | 0.00 | 0  | 1.96 | 1.21 | 11 | 0.86 | 0.34 | 10 | 0.10  | 0.03  | 5  | 3.37 | 1.39 | 11   | 0.05 | 0.02 | 6    | 0.00 | 0.00 | 0    | 0.32 | 0.20 | 14   | 3.64 | 1.84 | 128  | 11.45 | 11.91 | 68   | 0.00 | 0.00 | 0    |   |
|                                    | Central        | 23                   |              |       | 4.09         | 0.00 | 0.00 | 0  | 0.00 | 0.00 | 0  | 0.00 | 0.00 | 0  | 0.00  | 0.00  | 0  | 0.00 | 0.00 | 0.00 | 0.00 | 0.00 | 0.00 | 0.00 | 0.00 | 0.00 | 0    | 0.56 | 0.51 | 2    | 1.88 | 0.94 | 16    | 1.65  | 0.00 | 1    | 0.00 | 0.00 | 0 |
|                                    | Lateral I      | 47                   |              |       | 2.74         | 0.00 | 0.00 | 0  | 0.00 | 0.00 | 0  | 0.00 | 0.00 | 0  | 0.10  | 0.00  | 1  | 0.00 | 0.00 | 0.00 | 0.00 | 0.00 | 0.00 | 0.00 | 0.00 | 0.00 | 0    | 0.00 | 0.00 | 0    | 2.64 | 1.33 | 20    | 0.00  | 0.00 | 0    | 0.00 | 0.00 | 0 |
|                                    | Lateral II     | 71                   |              |       | 23.24        | 0.00 | 0.00 | 0  | 1.96 | 1.21 | 11 | 0.86 | 0.34 | 10 | 0.09  | 0.05  | 3  | 3.37 | 1.39 | 11   | 0.05 | 0.02 | 6    | 0.00 | 0.00 | 0    | 0.29 | 0.13 | 10   | 4.68 | 1.42 | 71   | 11.94 | 11.96 | 65   | 0.00 | 0.00 | 0    |   |
|                                    | Marginal       | 71                   |              |       | 3.22         | 0.00 | 0.00 | 0  | 0.00 | 0.00 | 0  | 0.00 | 0.00 | 0  | 0.12  | 0.00  | 1  | 0.00 | 0.00 | 0.00 | 0.00 | 0.00 | 0.00 | 0.00 | 0.00 | 0.00 | 0    | 0.25 | 0.00 | 2    | 2.40 | 1.74 | 21    | 0.45  | 0.04 | 2    | 0.00 | 0.00 | 0 |
| <i>Acanthochitona fascicularis</i> | All teeth      | 58                   | 12.40        | 16.04 | 28.04        | 0.90 | 0.75 | 36 | 1.44 | 1.21 | 20 | 1.65 | 1.26 | 39 | 0.00  | 0.00  | 0  | 2.62 | 2.25 | 34   | 0.32 | 0.29 | 26   | 0.02 | 0.00 | 2    | 0.44 | 0.17 | 4    | 2.34 | 1.97 | 39   | 18.31 | 7.60  | 22   | 0.00 | 0.00 | 0    |   |
|                                    | Central        | 10                   |              |       | 0.79         | 0.01 | 0.01 | 5  | 0.00 | 0.00 | 0  | 0.03 | 0.02 | 5  | 0.00  | 0.00  | 0  | 0.70 | 0.05 | 2    | 0.04 | 0.02 | 4    | 0.00 | 0.00 | 0    | 0.00 | 0.00 | 0    | 0.01 | 0.01 | 3    | 0.00  | 0.00  | 0    | 0.00 | 0.00 | 0    |   |
|                                    | Lateral I      | 12                   |              |       | 3.54         | 0.79 | 0.34 | 12 | 0.54 | 0.28 | 6  | 0.64 | 0.43 | 12 | 0.00  | 0.00  | 0  | 0.67 | 0.43 | 12   | 0.09 | 0.03 | 4    | 0.00 | 0.00 | 0    | 0.00 | 0.00 | 0    | 0.78 | 0.36 | 12   | 0.03  | 0.00  | 2    | 0.00 | 0.00 | 0    |   |
|                                    | Lateral II     | 20                   |              |       | 35.22        | 1.21 | 0.84 | 19 | 2.12 | 0.92 | 12 | 2.81 | 0.26 | 20 | 0.00  | 0.00  | 0  | 3.98 | 1.99 | 20   | 0.43 | 0.28 | 18   | 0.00 | 0.00 | 0    | 0.44 | 0.17 | 4    | 4.09 | 1.00 | 20   | 20.14 | 5.01  | 20   | 0.00 | 0.00 | 0    |   |
|                                    | Marginal       | 16                   |              |       | 0.28         | 0.00 | 0.00 | 0  | 0.06 | 0.00 | 2  | 0.15 | 0.01 | 2  | 0.00  | 0.00  | 0  | 0.00 | 0.00 | 0.00 | 0.00 | 0.00 | 0.00 | 0.00 | 0.00 | 0.00 | 2    | 0.00 | 0.00 | 0    | 0.05 | 0.01 | 4     | 0.00  | 0.00 | 0    | 0.00 | 0.00 | 0 |
| <i>Histioteuthis spec.</i>         | All teeth      | 46                   | 3.41         | 1.73  | 3.48         | 0.00 | 0.00 | 0  | 0.02 | 1.12 | 15 | 0.19 | 0.15 | 46 | 0.26  | 0.21  | 36 | 1.14 | 0.47 | 46   | 0.34 | 0.11 | 46   | 0.32 | 0.29 | 46   | 0.00 | 0.00 | 0    | 1.01 | 1.31 | 46   | 0.00  | 0.00  | 0    | 0.20 | 0.15 | 46   |   |
|                                    | Central        | 8                    |              |       | 3.36         | 0.00 | 0.00 | 0  | 0.02 | 0.00 | 2  | 0.13 | 0.19 | 8  | 0.16  | 0.13  | 8  | 1.09 | 0.46 | 8    | 0.32 | 0.11 | 8    | 0.21 | 0.17 | 8    | 0.00 | 0.00 | 0    | 1.07 | 0.85 | 8    | 0.00  | 0.00  | 0    | 0.36 | 0.28 | 8    |   |
|                                    | Lateral        | 12                   |              |       | 2.56         | 0.00 | 0.00 | 0  | 0.02 | 0.01 | 5  | 0.08 | 0.08 | 12 | 0.18  | 0.06  | 3  | 1.06 | 0.46 | 12   | 0.45 | 0.08 | 12   | 0.34 | 0.26 | 12   | 0.00 | 0.00 | 0    | 0.26 | 0.13 | 12   | 0.00  | 0.00  | 0    | 0.17 | 0.03 | 12   |   |
|                                    | Outer Marginal | 26                   |              |       | 3.91         | 0.00 | 0.00 | 0  | 0.02 | 0.01 | 8  | 0.25 | 0.12 | 26 | 0.30  | 0.23  | 25 | 1.19 | 0.48 | 26   | 0.30 | 0.10 | 26   | 0.34 | 0.33 | 26   | 0.00 | 0.00 | 0    | 1.34 | 1.58 | 26   | 0.00  | 0.00  | 0    | 0.17 | 0.09 | 26   |   |
| <i>Loligo vulgaris</i>             | All teeth      | 48                   | 2.82         | 1.10  | 2.83         | 0.00 | 0.00 | 0  | 0.02 | 0.01 | 15 | 0.17 | 0.15 | 48 | 0.20  | 0.08  | 48 | 1.16 | 0.54 | 48   | 0.33 | 0.10 | 48   | 0.14 | 0.11 | 48   | 0.00 | 0.00 | 0    | 0.63 | 0.54 | 48   | 0.00  | 0.00  | 0    | 0.18 | 0.10 | 48   |   |
|                                    | Central        | 6                    |              |       | 2.41         | 0.00 | 0.00 | 0  | 0.02 | 0.01 | 2  | 0.09 | 0.12 | 6  | 0.27  | 0.07  | 6  | 0.81 | 0.27 | 6    | 0.23 | 0.03 | 6    | 0.12 | 0.06 | 6    | 0.00 | 0.00 | 0    | 0.69 | 0.39 | 6    | 0.00  | 0.00  | 0    | 0.18 | 0.13 | 6    |   |
|                                    | Lateral        | 12                   |              |       | 2.28         | 0.00 | 0.00 | 0  | 0.02 | 0.01 | 4  | 0.03 | 0.01 | 12 | 0.14  | 0.06  | 12 | 0.99 | 0.50 | 12   | 0.40 | 0.07 | 12   | 0.12 | 0.14 | 12   | 0.00 | 0.00 | 0    | 0.42 | 0.52 | 12   | 0.00  | 0.00  | 0    | 0.16 | 0.05 | 12   |   |
|                                    | Inner marginal | 14                   |              |       | 3.25         | 0.00 | 0.00 | 0  | 0.02 | 0.01 | 5  | 0.25 | 0.13 | 14 | 0.24  | 0.08  | 14 | 1.38 | 0.54 | 14   | 0.33 | 0.10 | 14   | 0.15 | 0.13 | 14   | 0.00 | 0.00 | 0    | 0.69 | 0.70 | 14   | 0.00  | 0.00  | 0    | 0.19 | 0.10 | 14   |   |
|                                    | Outer marginal | 16                   |              |       | 3.05         | 0.00 | 0.00 | 0  | 0.02 | 0.01 | 4  | 0.23 | 0.14 | 16 | 0.19  | 0.06  | 16 | 1.23 | 0.56 | 16   | 0.32 | 0.09 | 16   | 0.17 | 0.08 | 16   | 0.00 | 0.00 | 0    | 0.70 | 0.44 | 16   | 0.00  | 0.00  | 0    | 0.19 | 0.11 | 16   |   |
| <i>Patella vulgata</i>             | All teeth      | 50                   | 29.64        | 25.11 | 40.95        | 0.32 | 0.21 | 50 | 0.03 | 0.01 | 25 | 0.64 | 0.58 | 49 | 15.28 | 10.20 | 40 | 3.16 | 2.86 | 50   | 1.56 | 0.87 | 36   | 0.00 | 0.00 | 0    | 0.72 | 0.54 | 12   | 2.77 | 2.77 | 50   | 16.47 | 2.79  | 28   | 0.00 | 0.00 | 0    |   |
|                                    | Lateral        | 14                   |              |       | 52.49        | 0.40 | 0.24 | 14 | 0.02 | 0.01 | 6  | 0.90 | 0.34 | 14 | 21.47 | 4.19  | 14 | 5.00 | 2.56 | 14   | 2.04 | 0.65 | 14   | 0.00 | 0.00 | 0    | 0.47 | 0.45 | 6    | 4.68 | 2.22 | 14   | 17.51 | 2.89  | 14   | 0.00 | 0.00 | 0    |   |
|                                    | Dominant tooth | 14                   |              |       | 51.12        | 0.40 | 0.21 | 14 | 0.05 | 0.02 | 7  | 1.20 | 0.51 | 14 | 21.33 | 4.98  | 14 | 5.23 | 2.28 | 14   | 1.66 | 0.77 | 14   | 0.00 | 0.00 | 0    | 0.96 | 0.54 | 6    | 4.87 | 2.07 | 14   | 15.42 | 2.33  | 14   | 0.00 | 0.00 | 0    |   |
|                                    | Marginal       | 22                   |              |       | 2.79         | 0.21 | 0.12 | 22 | 0.03 | 0.02 | 12 | 0.10 | 0.06 | 21 | 1.01  | 1.11  | 12 | 0.67 | 0.42 | 22   | 0.55 | 0.52 | 8    | 0.00 | 0.00 | 0    | 0.00 | 0.00 | 0    | 0.22 | 0.17 | 22   | 0.00  | 0.00  | 0    | 0.00 | 0.00 | 0    |   |
| <i>Rochia</i>                      | All teeth      | 70                   | 2.04         | 0.68  | 2.32         | 0.17 | 0.09 | 70 | 0.19 | 0.02 | 14 | 0.42 | 0.22 | 70 | 0.02  | 0.01  | 4  | 0.40 | 0.25 | 70   | 0.17 | 0.15 | 29   | 0.00 | 0.00 | 0    | 0.00 | 0.00 | 0    | 0.95 | 0.44 | 70   | 0.00  | 0.00  | 0    | 0.00 | 0.00 | 0    |   |

|                             |                |     |      |      |      |      |      |    |      |      |    |      |      |    |      |      |    |      |      |    |      |      |    |      |      |    |      |      |    |      |      |     |      |      |    |      |      |   |
|-----------------------------|----------------|-----|------|------|------|------|------|----|------|------|----|------|------|----|------|------|----|------|------|----|------|------|----|------|------|----|------|------|----|------|------|-----|------|------|----|------|------|---|
| conus                       | Central        | 8   |      |      | 2.49 | 0.26 | 0.10 | 8  | 0.24 | 0.04 | 4  | 0.43 | 0.22 | 8  | 0.00 | 0.00 | 0  | 0.46 | 0.44 | 8  | 0.13 | 0.06 | 4  | 0.00 | 0.00 | 0  | 0.00 | 0.00 | 0  | 0.97 | 0.43 | 8   | 0.00 | 0.00 | 0  | 0.00 | 0.00 | 0 |
|                             | Lateral        | 18  |      |      | 2.13 | 0.13 | 0.05 | 18 | 0.07 | 0.01 | 5  | 0.49 | 0.11 | 18 | 0.00 | 0.00 | 0  | 0.35 | 0.17 | 18 | 0.16 | 0.10 | 6  | 0.00 | 0.00 | 0  | 0.00 | 0.00 | 0  | 0.93 | 0.35 | 18  | 0.00 | 0.00 | 0  | 0.00 | 0.00 | 0 |
|                             | Inner marginal | 22  |      |      | 2.65 | 0.22 | 0.08 | 22 | 0.20 | 0.02 | 4  | 0.43 | 0.30 | 22 | 0.02 | 0.00 | 2  | 0.47 | 0.28 | 22 | 0.13 | 0.12 | 9  | 0.00 | 0.00 | 0  | 0.00 | 0.00 | 0  | 1.18 | 0.47 | 22  | 0.00 | 0.00 | 0  | 0.00 | 0.00 | 0 |
|                             | Outer marginal | 22  |      |      | 2.04 | 0.12 | 0.06 | 22 | 0.27 | 0.02 | 2  | 0.35 | 0.19 | 22 | 0.01 | 0.00 | 2  | 0.34 | 0.19 | 22 | 0.23 | 0.22 | 10 | 0.00 | 0.00 | 0  | 0.00 | 0.00 | 0  | 0.72 | 0.39 | 22  | 0.00 | 0.00 | 0  | 0.00 | 0.00 | 0 |
| <i>Haliotis tuberculata</i> | All teeth      | 66  | 1.91 | 1.30 | 2.49 | 0.13 | 0.06 | 66 | 0.05 | 0.08 | 24 | 0.09 | 0.10 | 30 | 0.74 | 0.58 | 24 | 0.44 | 0.50 | 66 | 0.05 | 0.03 | 23 | 0.00 | 0.00 | 0  | 0.00 | 0.00 | 0  | 0.99 | 0.58 | 66  | 0.00 | 0.00 | 0  | 0.00 | 0.00 | 0 |
|                             | Central        | 18  |      |      | 3.52 | 0.14 | 0.06 | 18 | 0.07 | 0.04 | 7  | 0.12 | 0.09 | 18 | 0.80 | 0.62 | 18 | 0.69 | 0.85 | 18 | 0.07 | 0.02 | 5  | 0.00 | 0.00 | 0  | 0.00 | 0.00 | 0  | 1.63 | 0.41 | 18  | 0.00 | 0.00 | 0  | 0.00 | 0.00 | 0 |
|                             | Lateral        | 10  |      |      | 2.68 | 0.14 | 0.06 | 10 | 0.07 | 0.02 | 3  | 0.04 | 0.02 | 4  | 0.58 | 0.41 | 6  | 0.48 | 0.31 | 10 | 0.06 | 0.06 | 4  | 0.00 | 0.00 | 0  | 0.00 | 0.00 | 0  | 1.31 | 0.22 | 10  | 0.00 | 0.00 | 0  | 0.00 | 0.00 | 0 |
|                             | Inner marginal | 20  |      |      | 1.13 | 0.13 | 0.05 | 20 | 0.07 | 0.06 | 8  | 0.09 | 0.17 | 5  | 0.00 | 0.00 | 0  | 0.25 | 0.17 | 20 | 0.02 | 0.02 | 6  | 0.00 | 0.00 | 0  | 0.00 | 0.00 | 0  | 0.57 | 0.31 | 20  | 0.00 | 0.00 | 0  | 0.00 | 0.00 | 0 |
|                             | Outer marginal | 18  |      |      | 1.25 | 0.13 | 0.07 | 18 | 0.02 | 0.01 | 7  | 0.02 | 0.01 | 3  | 0.00 | 0.00 | 0  | 0.39 | 0.20 | 18 | 0.06 | 0.02 | 8  | 0.00 | 0.00 | 0  | 0.00 | 0.00 | 0  | 0.63 | 0.36 | 18  | 0.00 | 0.00 | 0  | 0.00 | 0.00 | 0 |
| <i>Vittina turrita</i>      | All teeth      | 64  | 2.25 | 1.96 | 2.69 | 0.00 | 0.00 | 0  | 0.03 | 0.04 | 20 | 0.16 | 0.13 | 27 | 0.21 | 0.26 | 64 | 0.55 | 0.56 | 54 | 0.42 | 0.18 | 64 | 0.17 | 0.18 | 64 | 0.00 | 0.00 | 0  | 0.82 | 0.90 | 64  | 0.33 | 0.09 | 16 | 0.00 | 0.00 | 0 |
|                             | Lateral I      | 20  |      |      | 1.75 | 0.00 | 0.00 | 0  | 0.02 | 0.01 | 6  | 0.04 | 0.03 | 5  | 0.14 | 0.06 | 20 | 0.43 | 0.30 | 18 | 0.33 | 0.18 | 20 | 0.13 | 0.10 | 20 | 0.00 | 0.00 | 0  | 0.66 | 0.50 | 20  | 0.00 | 0.00 | 0  | 0.00 | 0.00 | 0 |
|                             | Lateral II     | 16  |      |      | 4.8  | 0.00 | 0.00 | 0  | 0.06 | 0.01 | 7  | 0.25 | 0.10 | 16 | 0.58 | 0.26 | 16 | 1.04 | 0.78 | 16 | 0.46 | 0.07 | 16 | 0.35 | 0.26 | 16 | 0.00 | 0.00 | 0  | 1.73 | 1.29 | 16  | 0.33 | 0.09 | 16 | 0.00 | 0.00 | 0 |
|                             | Inner marginal | 12  |      |      | 1.33 | 0.00 | 0.00 | 0  | 0.01 | 0.00 | 3  | 0.01 | 0.00 | 2  | 0.04 | 0.02 | 12 | 0.28 | 0.22 | 7  | 0.51 | 0.19 | 12 | 0.09 | 0.07 | 12 | 0.00 | 0.00 | 0  | 0.39 | 0.37 | 12  | 0.00 | 0.00 | 0  | 0.00 | 0.00 | 0 |
|                             | Outer marginal | 16  |      |      | 1.35 | 0.00 | 0.00 | 0  | 0.02 | 0.01 | 5  | 0.02 | 0.01 | 4  | 0.06 | 0.06 | 16 | 0.27 | 0.16 | 13 | 0.44 | 0.20 | 16 | 0.09 | 0.06 | 16 | 0.00 | 0.00 | 0  | 0.45 | 0.28 | 16  | 0.00 | 0.00 | 0  | 0.00 | 0.00 | 0 |
| <i>Lavigeria grandis</i>    | All teeth      | 58  | 1.85 | 1.66 | 3.12 | 0.00 | 0.00 | 0  | 0.98 | 0.02 | 34 | 0.19 | 0.11 | 38 | 0.03 | 0.01 | 16 | 0.62 | 0.61 | 36 | 0.14 | 0.05 | 26 | 0.28 | 0.20 | 32 | 0.00 | 0.00 | 0  | 0.88 | 1.13 | 36  | 0.00 | 0.00 | 0  | 0.00 | 0.00 | 0 |
|                             | Central        | 18  |      |      | 2.58 | 0.00 | 0.00 | 0  | 0.69 | 0.34 | 12 | 0.18 | 0.06 | 18 | 0.03 | 0.01 | 6  | 0.44 | 0.29 | 18 | 0.16 | 0.03 | 8  | 0.18 | 0.09 | 18 | 0.00 | 0.00 | 0  | 0.90 | 0.99 | 18  | 0.00 | 0.00 | 0  | 0.00 | 0.00 | 0 |
|                             | Lateral        | 14  |      |      | 4.07 | 0.00 | 0.00 | 0  | 1.16 | 0.68 | 10 | 0.27 | 0.09 | 14 | 0.03 | 0.01 | 9  | 1.00 | 0.78 | 14 | 0.11 | 0.06 | 6  | 0.41 | 0.23 | 14 | 0.00 | 0.00 | 0  | 1.09 | 1.39 | 14  | 0.00 | 0.00 | 0  | 0.00 | 0.00 | 0 |
|                             | Marginal I     | 12  |      |      | 1.34 | 0.00 | 0.00 | 0  | 1.16 | 0.48 | 6  | 0.02 | 0.01 | 3  | 0.02 | 0.00 | 1  | 0.01 |      | 2  | 0.13 | 0.07 | 6  | 0.00 | 0.00 | 0  | 0.00 | 0.00 | 0  | 0.00 | 0.00 | 0   | 0.00 | 0.00 | 0  | 0.00 | 0.00 | 0 |
|                             | Marginal II    | 14  |      |      | 1.39 | 0.00 | 0.00 | 0  | 1.08 | 0.29 | 6  | 0.02 | 0.01 | 3  | 0.00 | 0.00 | 0  | 0.10 | 0.01 | 2  | 0.14 | 0.05 | 7  | 0.00 | 0.00 | 0  | 0.00 | 0.00 | 0  | 0.05 | 0.03 | 4   | 0.00 | 0.00 | 0  | 0.00 | 0.00 | 0 |
| <i>Lavigeria nassa</i>      | All teeth      | 104 | 1.79 | 0.88 | 2.08 | 0.00 | 0.00 | 0  | 0.14 | 0.51 | 22 | 0.19 | 0.06 | 98 | 0.03 | 0.00 | 2  | 0.52 | 0.33 | 84 | 0.18 | 0.08 | 98 | 0.18 | 0.11 | 83 | 0.00 | 0.00 | 0  | 0.84 | 0.47 | 104 | 0.00 | 0.00 | 0  | 0.00 | 0.00 | 0 |
|                             | Central        | 20  |      |      | 2.56 | 0.00 | 0.00 | 0  | 0.17 | 0.01 | 4  | 0.17 | 0.06 | 20 | 0.00 | 0.00 | 0  | 0.64 | 0.31 | 20 | 0.17 | 0.09 | 18 | 0.21 | 0.10 | 20 | 0.00 | 0.00 | 0  | 1.20 | 0.45 | 20  | 0.00 | 0.00 | 0  | 0.00 | 0.00 | 0 |
|                             | Lateral        | 60  |      |      | 2.13 | 0.00 | 0.00 | 0  | 0.14 | 0.06 | 10 | 0.22 | 0.07 | 56 | 0.03 | 0.00 | 2  | 0.51 | 0.33 | 60 | 0.17 | 0.07 | 56 | 0.18 | 0.11 | 60 | 0.00 | 0.00 | 0  | 0.88 | 0.44 | 60  | 0.00 | 0.00 | 0  | 0.00 | 0.00 | 0 |
|                             | Marginal I     | 12  |      |      | 1.33 | 0.00 | 0.00 | 0  | 0.14 | 0.01 | 4  | 0.17 | 0.02 | 10 | 0.00 | 0.00 | 0  | 0.22 | 0.36 | 3  | 0.19 | 0.09 | 12 | 0.12 | 0.13 | 2  | 0.00 | 0.00 | 0  | 0.49 | 0.25 | 12  | 0.00 | 0.00 | 0  | 0.00 | 0.00 | 0 |
|                             | Marginal II    | 12  |      |      | 0.87 | 0.00 | 0.00 | 0  | 0.10 | 0.01 | 5  | 0.15 | 0.04 | 12 | 0.00 | 0.00 | 0  | 0.02 | 0.00 | 1  | 0.18 | 0.07 | 12 | 0.01 | 0.00 | 1  | 0.00 | 0.00 | 0  | 0.41 | 0.16 | 12  | 0.00 | 0.00 | 0  | 0.00 | 0.00 | 0 |
| <i>Paramelania damoni</i>   | All teeth      | 60  | 0.71 | 0.63 | 1.37 | 0.00 | 0.00 | 0  | 0.22 | 0.05 | 32 | 0.16 | 0.09 | 35 | 0.03 | 0.02 | 10 | 0.17 | 0.15 | 23 | 0.24 | 0.14 | 44 | 0.08 | 0.07 | 20 | 0.08 | 0.08 | 24 | 0.39 | 0.39 | 29  | 0.00 | 0.00 | 0  | 0.00 | 0.00 | 0 |
|                             | Central        | 14  |      |      | 0.95 | 0.00 | 0.00 | 0  | 0.30 | 0.24 | 10 | 0.19 | 0.10 | 14 | 0.02 | 0.00 | 2  | 0.05 | 0.00 | 2  | 0.20 | 0.10 | 10 | 0.02 | 0.00 | 2  | 0.05 | 0.06 | 8  | 0.12 | 0.06 | 13  | 0.00 | 0.00 | 0  | 0.00 | 0.00 | 0 |
|                             | Lateral        | 16  |      |      | 1.71 | 0.00 | 0.00 | 0  | 0.22 | 0.14 | 8  | 0.17 | 0.08 | 16 | 0.04 | 0.01 | 3  | 0.19 | 0.16 | 16 | 0.32 | 0.19 | 10 | 0.09 | 0.08 | 16 | 0.06 | 0.08 | 8  | 0.62 | 0.40 | 16  | 0.00 | 0.00 | 0  | 0.00 | 0.00 | 0 |
|                             | Marginal I     | 18  |      |      | 0.66 | 0.00 | 0.00 | 0  | 0.04 | 0.03 | 6  | 0.07 | 0.05 | 3  | 0.01 | 0.00 | 2  | 0.26 | 0.03 | 2  | 0.20 | 0.13 | 14 | 0.01 | 0.00 | 1  | 0.07 | 0.01 | 4  | 0.00 | 0.00 | 0   | 0.00 | 0.00 | 0  | 0.00 | 0.00 | 0 |
|                             | Marginal II    | 12  |      |      | 1.04 | 0.00 | 0.00 | 0  | 0.26 | 0.09 | 8  | 0.10 | 0.04 | 2  | 0.04 | 0.02 | 4  | 0.09 | 0.09 | 3  | 0.23 | 0.12 | 10 | 0.11 | 0.00 | 1  | 0.21 | 0.02 | 4  | 0.00 | 0.00 | 0   | 0.00 | 0.00 | 0  | 0.00 | 0.00 | 0 |

|                            |             |    |      |      |      |      |      |    |      |      |    |      |      |    |      |      |    |      |      |    |      |      |    |      |      |    |      |      |    |      |      |    |      |      |    |      |      |    |
|----------------------------|-------------|----|------|------|------|------|------|----|------|------|----|------|------|----|------|------|----|------|------|----|------|------|----|------|------|----|------|------|----|------|------|----|------|------|----|------|------|----|
| <i>Cleopatra johnstoni</i> | All teeth   | 52 | 0.80 | 0.48 | 1.16 | 0.00 | 0.00 | 0  | 0.42 | 0.18 | 52 | 0.39 | 0.24 | 33 | 0.00 | 0.00 | 0  | 0.14 | 0.04 | 12 | 0.14 | 0.04 | 30 | 0.05 | 0.02 | 18 | 0.02 | 0.01 | 14 | 0.00 | 0.00 | 0  | 0.00 | 0.00 | 0  | 0.00 | 0.00 | 0  |
|                            | Central     | 14 |      |      | 1.33 | 0.00 | 0.00 | 0  | 0.54 | 0.30 | 14 | 0.49 | 0.27 | 11 | 0.00 | 0.00 | 0  | 0.08 | 0.01 | 2  | 0.14 | 0.06 | 8  | 0.06 | 0.00 | 4  | 0.02 | 0.01 | 6  | 0.00 | 0.00 | 0  | 0.00 | 0.00 | 0  | 0.00 | 0.00 | 0  |
|                            | Lateral     | 16 |      |      | 1.04 | 0.00 | 0.00 | 0  | 0.37 | 0.26 | 16 | 0.30 | 0.23 | 6  | 0.00 | 0.00 | 0  | 0.17 | 0.01 | 2  | 0.13 | 0.04 | 10 | 0.05 | 0.02 | 8  | 0.02 | 0.01 | 4  | 0.00 | 0.00 | 0  | 0.00 | 0.00 | 0  | 0.00 | 0.00 | 0  |
|                            | Marginal I  | 10 |      |      | 0.83 | 0.00 | 0.00 | 0  | 0.32 | 0.16 | 10 | 0.25 | 0.18 | 5  | 0.00 | 0.00 | 0  | 0.14 | 0.04 | 4  | 0.10 | 0.00 | 2  | 0.02 | 0.00 | 2  | 0.00 | 0.00 | 0  | 0.00 | 0.00 | 0  | 0.00 | 0.00 | 0  | 0.00 | 0.00 | 0  |
|                            | Marginal II | 12 |      |      | 1.18 | 0.00 | 0.00 | 0  | 0.42 | 0.26 | 12 | 0.40 | 0.21 | 11 | 0.00 | 0.00 | 0  | 0.16 | 0.03 | 4  | 0.15 | 0.03 | 10 | 0.04 | 0.01 | 4  | 0.01 | 0.00 | 4  | 0.00 | 0.00 | 0  | 0.00 | 0.00 | 0  | 0.00 | 0.00 | 0  |
| <i>Reymondia horei</i>     | All teeth   | 72 | 2.46 | 0.96 | 3.32 | 0.00 | 0.00 | 0  | 0.42 | 0.26 | 44 | 0.17 | 0.09 | 58 | 0.06 | 0.06 | 14 | 0.52 | 0.33 | 56 | 0.38 | 0.15 | 70 | 0.19 | 0.16 | 67 | 0.06 | 0.01 | 10 | 0.87 | 0.38 | 70 | 0.32 | 0.02 | 2  | 0.33 | 0.17 | 52 |
|                            | Central     | 8  |      |      | 3.12 | 0.00 | 0.00 | 0  | 0.58 | 0.17 | 6  | 0.23 | 0.05 | 6  | 0.04 | 0.00 | 2  | 0.34 | 0.11 | 8  | 0.34 | 0.06 | 8  | 0.11 | 0.04 | 8  | 0.07 | 0.00 | 2  | 1.02 | 0.39 | 8  | 0.00 | 0.00 | 0  | 0.39 | 0.16 | 8  |
|                            | Lateral     | 44 |      |      | 3.66 | 0.00 | 0.00 | 0  | 0.47 | 0.23 | 25 | 0.15 | 0.09 | 38 | 0.07 | 0.08 | 8  | 0.65 | 0.33 | 34 | 0.40 | 0.17 | 44 | 0.24 | 0.17 | 44 | 0.05 | 0.01 | 8  | 0.96 | 0.39 | 44 | 0.32 | 0.02 | 2  | 0.35 | 0.15 | 40 |
|                            | Marginal I  | 8  |      |      | 1.78 | 0.00 | 0.00 | 0  | 0.02 | 0.01 | 3  | 0.18 | 0.05 | 4  | 0.05 | 0.00 | 2  | 0.44 | 0.30 | 3  | 0.43 | 0.10 | 6  | 0.06 | 0.04 | 5  | 0.04 | 0.01 | 4  | 0.54 | 0.05 | 6  | 0.00 | 0.00 | 0  | 0.02 | 0.01 | 2  |
|                            | Marginal II | 12 |      |      | 1.98 | 0.00 | 0.00 | 0  | 0.34 | 0.30 | 10 | 0.23 | 0.09 | 10 | 0.03 | 0.00 | 2  | 0.25 | 0.23 | 11 | 0.32 | 0.09 | 12 | 0.09 | 0.03 | 10 | 0.05 | 0.00 | 2  | 0.64 | 0.22 | 12 | 0.00 | 0.00 | 0  | 0.03 | 0.01 | 2  |
| <i>Spekia zonata</i>       | All teeth   | 64 | 3.47 | 1.34 | 3.62 | 0.00 | 0.00 | 0  | 0.73 | 0.26 | 60 | 0.18 | 0.11 | 64 | 0.09 | 0.01 | 2  | 0.68 | 0.47 | 64 | 0.24 | 0.22 | 58 | 0.25 | 0.13 | 64 | 0.00 | 0.00 | 0  | 1.45 | 0.67 | 64 | 0.00 | 0.00 | 0  | 0.00 | 0.00 | 0  |
|                            | Central     | 14 |      |      | 4.33 | 0.00 | 0.00 | 0  | 0.94 | 0.26 | 12 | 0.24 | 0.08 | 14 | 0.00 | 0.00 | 0  | 0.79 | 0.71 | 14 | 0.31 | 0.39 | 14 | 0.30 | 0.20 | 14 | 0.00 | 0.00 | 0  | 1.75 | 1.04 | 14 | 0.00 | 0.00 | 0  | 0.00 | 0.00 | 0  |
|                            | Lateral     | 12 |      |      | 3.67 | 0.00 | 0.00 | 0  | 0.55 | 0.21 | 10 | 0.29 | 0.08 | 12 | 0.00 | 0.00 | 0  | 0.65 | 0.44 | 12 | 0.15 | 0.07 | 10 | 0.29 | 0.08 | 12 | 0.00 | 0.00 | 0  | 1.74 | 0.45 | 12 | 0.00 | 0.00 | 0  | 0.00 | 0.00 | 0  |
|                            | Marginal I  | 20 |      |      | 3.4  | 0.00 | 0.00 | 0  | 0.78 | 0.30 | 20 | 0.14 | 0.09 | 20 | 0.09 | 0.01 | 2  | 0.65 | 0.33 | 20 | 0.23 | 0.07 | 20 | 0.23 | 0.09 | 20 | 0.00 | 0.00 | 0  | 1.28 | 0.47 | 20 | 0.00 | 0.00 | 0  | 0.00 | 0.00 | 0  |
|                            | Marginal II | 18 |      |      | 3.05 | 0.00 | 0.00 | 0  | 0.63 | 0.21 | 18 | 0.09 | 0.05 | 18 | 0.00 | 0.00 | 0  | 0.66 | 0.40 | 18 | 0.25 | 0.21 | 14 | 0.22 | 0.09 | 18 | 0.00 | 0.00 | 0  | 1.20 | 0.46 | 18 | 0.00 | 0.00 | 0  | 0.00 | 0.00 | 0  |
| <i>Faunus ater</i>         | All teeth   | 56 | 0.98 | 0.67 | 1.37 | 0.00 | 0.00 | 0  | 0.23 | 0.10 | 14 | 0.12 | 0.09 | 48 | 0.06 | 0.05 | 12 | 0.25 | 0.16 | 49 | 0.15 | 0.12 | 15 | 0.09 | 0.06 | 44 | 0.00 | 0.00 | 0  | 0.47 | 0.40 | 56 | 0.00 | 0.00 | 0  | 0.00 | 0.00 | 0  |
|                            | Central     | 16 |      |      | 1.52 | 0.00 | 0.00 | 0  | 0.16 | 0.09 | 5  | 0.17 | 0.08 | 16 | 0.03 | 0.02 | 4  | 0.22 | 0.16 | 16 | 0.18 | 0.08 | 4  | 0.10 | 0.07 | 16 | 0.00 | 0.00 | 0  | 0.66 | 0.37 | 16 | 0.00 | 0.00 | 0  | 0.00 | 0.00 | 0  |
|                            | Lateral     | 14 |      |      | 1.73 | 0.00 | 0.00 | 0  | 0.08 | 0.05 | 5  | 0.17 | 0.05 | 14 | 0.03 | 0.01 | 4  | 0.36 | 0.19 | 14 | 0.08 | 0.01 | 2  | 0.14 | 0.05 | 14 | 0.00 | 0.00 | 0  | 0.87 | 0.24 | 14 | 0.00 | 0.00 | 0  | 0.00 | 0.00 | 0  |
|                            | Marginal I  | 14 |      |      | 1.25 | 0.00 | 0.00 | 0  | 0.49 | 0.19 | 4  | 0.02 | 0.01 | 9  | 0.15 | 0.01 | 2  | 0.17 | 0.06 | 12 | 0.30 | 0.05 | 4  | 0.03 | 0.01 | 7  | 0.00 | 0.00 | 0  | 0.09 | 0.10 | 14 | 0.00 | 0.00 | 0  | 0.00 | 0.00 | 0  |
|                            | Marginal II | 12 |      |      | 0.78 | 0.00 | 0.00 | 0  | 0.15 | 0.01 | 2  | 0.04 | 0.02 | 9  | 0.08 | 0.01 | 2  | 0.21 | 0.08 | 7  | 0.03 | 0.02 | 5  | 0.06 | 0.03 | 7  | 0.00 | 0.00 | 0  | 0.21 | 0.19 | 12 | 0.00 | 0.00 | 0  | 0.00 | 0.00 | 0  |
| <i>Littorina littorea</i>  | All teeth   | 58 | 3.97 | 2.50 | 4.44 | 0.28 | 0.24 | 44 | 0.19 | 0.20 | 44 | 0.34 | 0.29 | 58 | 0.83 | 0.42 | 56 | 0.71 | 0.66 | 58 | 0.15 | 0.10 | 40 | 0.03 | 0.03 | 2  | 0.09 | 0.08 | 6  | 1.48 | 1.07 | 54 | 0.34 | 0.16 | 46 | 0.00 | 0.00 | 0  |
|                            | Central     | 24 |      |      | 5.46 | 0.37 | 0.25 | 18 | 0.19 | 0.09 | 22 | 0.50 | 0.28 | 24 | 1.09 | 0.25 | 24 | 0.92 | 0.71 | 24 | 0.09 | 0.07 | 24 | 0.03 | 0.03 | 2  | 0.00 | 0.00 | 0  | 1.87 | 1.00 | 24 | 0.40 | 0.13 | 24 | 0.00 | 0.00 | 0  |
|                            | Lateral     | 16 |      |      | 5.12 | 0.26 | 0.22 | 16 | 0.26 | 0.08 | 16 | 0.40 | 0.25 | 16 | 0.98 | 0.23 | 16 | 0.79 | 0.65 | 16 | 0.23 | 0.06 | 16 | 0.00 | 0.00 | 0  | 0.13 | 0.06 | 4  | 1.73 | 0.82 | 16 | 0.34 | 0.16 | 16 | 0.00 | 0.00 | 0  |
|                            | Marginal    | 18 |      |      | 1.55 | 0.15 | 0.21 | 10 | 0.02 | 0.01 | 6  | 0.09 | 0.13 | 18 | 0.29 | 0.24 | 16 | 0.36 | 0.47 | 18 | 0.00 | 0.00 | 0  | 0.00 | 0.00 | 0  | 0.01 | 0.00 | 2  | 0.53 | 0.91 | 14 | 0.10 | 0.04 | 6  | 0.00 | 0.00 | 0  |
|                            |             |    |      |      |      |      |      |    |      |      |    |      |      |    |      |      |    |      |      |    |      |      |    |      |      |    |      |      |    |      |      |    |      |      |    |      |      |    |
| <i>Paludomus siamensis</i> | All teeth   | 62 | 0.98 | 0.55 | 1.34 | 0.00 | 0.00 | 0  | 0.19 | 0.28 | 24 | 0.29 | 0.14 | 58 | 0.05 | 0.03 | 22 | 0.15 | 0.11 | 39 | 0.11 | 0.09 | 28 | 0.06 | 0.04 | 35 | 0.05 | 0.01 | 6  | 0.44 | 0.29 | 62 | 0.00 | 0.00 | 0  | 0.00 | 0.00 | 0  |
|                            | Central     | 18 |      |      | 1.17 | 0.00 | 0.00 | 0  | 0.16 | 0.11 | 12 | 0.27 | 0.14 | 16 | 0.08 | 0.01 | 6  | 0.09 | 0.06 | 18 | 0.09 | 0.07 | 12 | 0.04 | 0.03 | 17 | 0.00 | 0.00 | 0  | 0.44 | 0.18 | 18 | 0.00 | 0.00 | 0  | 0.00 | 0.00 | 0  |
|                            | Lateral     | 16 |      |      | 1.98 | 0.00 | 0.00 | 0  | 0.35 | 0.02 | 2  | 0.39 | 0.10 | 17 | 0.05 | 0.02 | 8  | 0.21 | 0.13 | 16 | 0.11 | 0.07 | 6  | 0.08 | 0.04 | 16 | 0.00 | 0.00 | 0  | 0.79 | 0.21 | 16 | 0.00 | 0.00 | 0  | 0.00 | 0.00 | 0  |
|                            | Marginal I  | 12 |      |      | 1.19 | 0.00 | 0.00 | 0  | 0.20 | 0.09 | 4  | 0.30 | 0.10 | 10 | 0.03 | 0.00 | 2  | 0.25 | 0.02 | 2  | 0.16 | 0.16 | 6  | 0.00 | 0.00 | 0  | 0.00 | 0.00 | 0  | 0.25 | 0.15 | 12 | 0.00 | 0.00 | 0  | 0.00 | 0.00 | 0  |
|                            | Marginal II | 16 |      |      | 0.84 | 0.00 | 0.00 | 0  | 0.17 | 0.08 | 6  | 0.21 | 0.15 | 16 | 0.03 | 0.02 | 6  | 0.11 | 0.08 | 3  | 0.09 | 0.01 | 4  | 0.01 | 0.00 | 2  | 0.00 | 0.00 | 0  | 0.22 | 0.16 | 16 | 0.00 | 0.00 | 0  | 0.00 | 0.00 | 0  |

|                               |                    |    |       |      |       |      |      |    |      |      |    |      |      |      |      |      |      |      |      |      |      |      |      |      |      |      |      |      |      |      |      |      |      |      |      |      |      |   |
|-------------------------------|--------------------|----|-------|------|-------|------|------|----|------|------|----|------|------|------|------|------|------|------|------|------|------|------|------|------|------|------|------|------|------|------|------|------|------|------|------|------|------|---|
| <i>Anentome helena</i>        | All teeth          | 44 | 5.68  | 2.55 | 6.27  | 0.00 | 0.00 | 0  | 0.35 | 0.11 | 44 | 0.14 | 0.05 | 18   | 0.07 | 0.00 | 2    | 2.31 | 1.58 | 44   | 0.72 | 0.51 | 18   | 0.89 | 0.47 | 44   | 0.00 | 0.00 | 0    | 1.79 | 1.39 | 44   | 0.00 | 0.00 | 0    | 0.00 | 0.00 | 0 |
|                               | Central            | 18 |       |      | 4.99  | 0.00 | 0.00 | 0  | 0.22 | 0.25 | 18 | 0.12 | 0.05 | 14   | 0.00 | 0.00 | 0    | 2.07 | 1.70 | 18   | 0.82 | 0.45 | 10   | 0.98 | 0.41 | 18   | 0.00 | 0.00 | 0    | 0.78 | 0.34 | 18   | 0.00 | 0.00 | 0    | 0.00 | 0.00 | 0 |
|                               | Lateral            | 26 |       |      | 7.06  | 0.00 | 0.00 | 0  | 0.43 | 0.25 | 26 | 0.19 | 0.02 | 4    | 0.07 | 0.00 | 2    | 2.47 | 1.51 | 26   | 0.60 | 0.59 | 8    | 0.82 | 0.50 | 26   | 0.00 | 0.00 | 0    | 2.48 | 1.42 | 26   | 0.00 | 0.00 | 0    | 0.00 | 0.00 | 0 |
| <i>Buccinum undatum</i>       | All teeth          | 54 | 5.41  | 2.10 | 5.59  | 0.00 | 0.00 | 0  | 0.24 | 0.27 | 54 | 0.12 | 0.06 | 42   | 0.00 | 0.00 | 0    | 2.11 | 0.76 | 54   | 0.38 | 0.21 | 32   | 0.74 | 0.23 | 54   | 0.00 | 0.00 | 0    | 2.00 | 1.61 | 54   | 0.00 | 0.00 | 0    | 0.00 | 0.00 | 0 |
|                               | Central            | 16 |       |      | 5.34  | 0.00 | 0.00 | 0  | 0.13 | 0.08 | 16 | 0.14 | 0.05 | 12   | 0.00 | 0.00 | 0    | 2.02 | 0.77 | 16   | 0.06 | 0.03 | 4    | 0.67 | 0.26 | 16   | 0.00 | 0.00 | 0    | 2.32 | 1.60 | 16   | 0.00 | 0.00 | 0    | 0.00 | 0.00 | 0 |
|                               | Lateral            | 38 |       |      | 5.62  | 0.00 | 0.00 | 0  | 0.28 | 0.18 | 38 | 0.12 | 0.06 | 30   | 0.00 | 0.00 | 0    | 2.15 | 0.77 | 38   | 0.43 | 0.18 | 28   | 0.77 | 0.21 | 38   | 0.00 | 0.00 | 0    | 1.87 | 1.61 | 38   | 0.00 | 0.00 | 0    | 0.00 | 0.00 | 0 |
| <i>Onchidoris bilamellata</i> | All teeth          | 38 | 11.59 | 9.82 | 19.59 | 1.75 | 0.90 | 28 | 0.53 | 0.17 | 18 | 0.99 | 0.21 | 24   | 0.00 | 0.00 | 0    | 5.63 | 1.59 | 24   | 0.24 | 0.13 | 22   | 0.98 | 0.26 | 6    | 0.09 | 0.08 | 10   | 9.38 | 2.99 | 24   | 0.00 | 0.00 | 0    | 0.00 | 0.00 | 0 |
|                               | Thickened membrane | 6  |       |      | 0.62  | 0.02 | 0.00 | 2  | 0.59 | 0.49 | 3  | 0.00 | 0.00 | 0    | 0.00 | 0.00 | 0    | 0.00 | 0.00 | 0    | 0.01 | 0.00 | 2    | 0.00 | 0.00 | 0    | 0.00 | 0.00 | 0    | 0.00 | 0.00 | 0    | 0.00 | 0.00 | 0    | 0.00 | 0.00 | 0 |
|                               | Lateral            | 24 |       |      | 20.04 | 2.03 | 0.59 | 24 | 0.64 | 0.54 | 11 | 0.99 | 0.21 | 24   | 0.00 | 0.00 | 0    | 5.63 | 1.59 | 24   | 0.28 | 0.10 | 18   | 0.98 | 0.26 | 6    | 0.11 | 0.08 | 8    | 9.38 | 2.99 | 24   | 0.00 | 0.00 | 0    | 0.00 | 0.00 | 0 |
|                               | Marginal           | 8  |       |      | 0.26  | 0.03 | 0.00 | 2  | 0.16 | 0.07 | 4  | 0.00 | 0.00 | 0    | 0.00 | 0.00 | 0    | 0.00 | 0.00 | 0    | 0.06 | 0.00 | 2    | 0.00 | 0.00 | 0    | 0.01 | 0.00 | 2    | 0.00 | 0.00 | 0    | 0.00 | 0.00 | 0    | 0.00 | 0.00 | 0 |
| <i>Aeolidia papillosa</i>     | All teeth          | 12 | 6.60  | 3.71 | 7.4   | 0.00 | 0.00 | 0  | 0.03 | 0.49 | 6  | 0.16 | 0.13 | 8    | 0.00 | 0.00 | 0    | 1.34 | 1.11 | 10   | 2.06 | 1.29 | 10   | 0.70 | 0.53 | 9    | 0.00 | 0.00 | 0    | 3.11 | 2.49 | 12   | 0.00 | 0.00 | 0    | 0.00 | 0.00 | 0 |
|                               | Inner part         | 6  |       |      | 9.78  | 0.00 | 0.00 | 0  | 0.04 | 0.04 | 3  | 0.25 | 0.13 | 4    | 0.00 | 0.00 | 0    | 2.11 | 0.65 | 6    | 1.23 | 0.90 | 6    | 0.99 | 0.38 | 6    | 0.00 | 0.00 | 0    | 5.16 | 1.88 | 6    | 0.00 | 0.00 | 0    | 0.00 | 0.00 | 0 |
|                               | Outer part         | 6  |       |      | 4.78  | 0.00 | 0.00 | 0  | 0.02 | 0.01 | 3  | 0.08 | 0.01 | 4    | 0.00 | 0.00 | 0    | 0.18 | 0.09 | 4    | 3.32 | 0.40 | 4    | 0.12 | 0.04 | 3    | 0.00 | 0.00 | 0    | 1.06 | 0.11 | 6    | 0.00 | 0.00 | 0    | 0.00 | 0.00 | 0 |
| <i>Polycera quadrilineata</i> | All teeth          | 18 | 3.32  | 1.20 | 5.89  | 0.00 | 0.00 | 0  | 0.17 | 0.03 | 8  | 0.58 | 0.29 | 18   | 0.00 | 0.00 | 0    | 2.09 | 0.35 | 42   | 0.68 | 0.10 | 8    | 0.00 | 0.00 | 0    | 0.00 | 0.00 | 0    | 2.37 | 1.14 | 18   | 0.00 | 0.00 | 0    | 0.00 | 0.00 | 0 |
|                               | Lateral            | 6  |       |      | 2.37  | 0.00 | 0.00 | 0  | 0.16 | 0.05 | 3  | 0.70 | 0.35 | 6    | 0.00 | 0.00 | 0    | 0.00 | 0.00 | 0    | 0.61 | 0.08 | 4    | 0.00 | 0.00 | 0    | 0.00 | 0.00 | 0    | 0.90 | 0.21 | 6    | 0.00 | 0.00 | 0    | 0.00 | 0.00 | 0 |
|                               | Marginal           | 12 |       |      | 4.55  | 0.00 | 0.00 | 0  | 0.18 | 0.09 | 5  | 0.52 | 0.24 | 12   | 0.00 | 0.00 | 0    | 0.00 | 0.00 | 0    | 0.75 | 0.05 | 4    | 0.00 | 0.00 | 0    | 0.00 | 0.00 | 0    | 3.10 | 0.49 | 12   | 0.00 | 0.00 | 0    | 0.00 | 0.00 | 0 |
| <i>Doris pseudoargus</i>      | All teeth          | 42 | 6.54  | 1.44 | 8.76  | 0.74 | 0.13 | 42 | 0.16 | 0.07 | 19 | 0.95 | 0.23 | 42   | 0.00 | 0.00 | 0    | 3.37 | 1.39 | 11   | 0.20 | 0.05 | 16   | 0.00 | 0.00 | 0    | 0.00 | 0.00 | 0    | 3.34 | 0.99 | 42   | 0.00 | 0.00 | 0    | 0.00 | 0.00 | 0 |
|                               | Outer teeth        | 20 |       |      | 6.91  | 0.67 | 0.13 | 20 | 0.13 | 0.08 | 10 | 0.86 | 0.26 | 20   | 0.00 | 0.00 | 0    | 1.95 | 0.37 | 20   | 0.22 | 0.02 | 6    | 0.00 | 0.00 | 0    | 0.00 | 0.00 | 0    | 3.08 | 0.90 | 20   | 0.00 | 0.00 | 0    | 0.00 | 0.00 | 0 |
|                               | Inner teeth        | 22 |       |      | 8.02  | 0.80 | 0.10 | 22 | 0.20 | 0.07 | 9  | 1.04 | 0.16 | 22   | 0.00 | 0.00 | 0    | 2.22 | 0.28 | 22   | 0.18 | 0.06 | 10   | 0.00 | 0.00 | 0    | 0.00 | 0.00 | 0    | 3.58 | 1.03 | 22   | 0.00 | 0.00 | 0    | 0.00 | 0.00 | 0 |
| <i>Cornu aspersum</i>         | All teeth          | 40 | 2.72  | 1.20 | 3.28  | 0.00 | 0.00 | 0  | 0.00 | 0.00 | 0  | 0.00 | 0    | 0.67 | 0.18 | 8    | 0.00 | 0.00 | 0    | 0.43 | 0.27 | 38   | 0.00 | 0.00 | 0    | 0.00 | 0.00 | 0    | 2.18 | 0.90 | 40   | 0.00 | 0.00 | 0    | 0.00 | 0.00 | 0    |   |
|                               | Inner teeth        | 20 |       |      | 3.32  | 0.00 | 0.00 | 0  | 0.00 | 0.00 | 0  | 0.00 | 0    | 0.65 | 0.17 | 4    | 0.00 | 0.00 | 0    | 0.40 | 0.25 | 18   | 0.00 | 0.00 | 0    | 0.00 | 0.00 | 0    | 2.27 | 0.90 | 20   | 0.00 | 0.00 | 0    | 0.00 | 0.00 | 0    |   |
|                               | Outer teeth        | 20 |       |      | 3.25  | 0.00 | 0.00 | 0  | 0.00 | 0.00 | 0  | 0.00 | 0    | 0.70 | 0.22 | 4    | 0.00 | 0.00 | 0    | 0.46 | 0.30 | 20   | 0.00 | 0.00 | 0    | 0.00 | 0.00 | 0    | 2.09 | 0.92 | 20   | 0.00 | 0.00 | 0    | 0.00 | 0.00 | 0    |   |

**Supplementary Table 4.** For all species and all teeth: correlations, estimated by row-wise method, between the individual elements studied, all elements, tooth row quantity, radular width, radular area, and radular length are given.

|                | All elements | Tooth rows | Radular width | Ca      | Cl      | Cu      | F       | Fe      | Radular area | K       | Radular length | Mg      | Na      | P       | S       | Si      |
|----------------|--------------|------------|---------------|---------|---------|---------|---------|---------|--------------|---------|----------------|---------|---------|---------|---------|---------|
| All elements   | 1.0000       | 0.0042     | -0.0331       | 0.6451  | 0.7671  | 0.3003  | 0.3680  | 0.8427  | 0.1302       | 0.6995  | 0.3190         | 0.6501  | 0.3467  | 0.7611  | 0.5572  | 0.9534  |
| Tooth rows     | -            | 1.0000     | 0.0832        | -0.2900 | -0.3919 | 0.4192  | -0.4058 | -0.4553 | 0.3600       | 0.1808  | 0.7385         | -0.1918 | -0.1604 | -0.2546 | 0.0581  | 0.1766  |
| Radular width  | -            | -          | 1.0000        | -0.0651 | -0.0080 | -0.1356 | -0.2420 | 0.1659  | 0.8090       | 0.5003  | 0.2490         | 0.0773  | -0.1828 | -0.0488 | -0.0102 | -0.0423 |
| Ca             | -            | -          | -             | 1.0000  | 0.5372  | 0.2259  | 0.7680  | 0.6199  | -0.1078      | 0.3222  | -0.1002        | 0.5331  | 0.3094  | 0.7655  | 0.2573  | 0.6276  |
| Cl             | -            | -          | -             | -       | 1.0000  | 0.0572  | 0.4111  | 0.0440  | -0.0661      | 0.6914  | -0.2076        | 0.0224  | 0.0284  | 0.8127  | 0.2263  | 0.0458  |
| Cu             | -            | -          | -             | -       | -       | 1.0000  | 0.0000  | -1.0000 | 0.0773       | -0.1058 | 0.2841         | 0.2279  | 0.4248  | 0.0735  | -0.1087 | -0.1462 |
| F              | -            | -          | -             | -       | -       | -       | 1.0000  | 0.4774  | -0.3801      | -0.3748 | -0.3367        | 0.4982  | 0.2849  | 0.6402  | -0.0357 | 0.3634  |
| Fe             | -            | -          | -             | -       | -       | -       | -       | 1.0000  | 0.0972       | 0.2475  | -0.1050        | 0.6293  | 0.5177  | 0.6084  | 0.3979  | 0.8123  |
| Radular area   | -            | -          | -             | -       | -       | -       | -       | -       | 1.0000       | 0.6269  | 0.6560         | -0.0243 | -0.2363 | -0.0210 | 0.2309  | 0.3747  |
| K              | -            | -          | -             | -       | -       | -       | -       | -       | -            | 1.0000  | 0.5732         | 0.5243  | 0.4182  | 0.6121  | 0.8370  | 0.6341  |
| Radular length | -            | -          | -             | -       | -       | -       | -       | -       | -            | -       | 1.0000         | 0.0254  | -0.2097 | 0.0687  | 0.3758  | 0.6224  |
| Mg             | -            | -          | -             | -       | -       | -       | -       | -       | -            | -       | -              | 1.0000  | 0.4927  | 0.5588  | 0.2312  | 0.7014  |
| Na             | -            | -          | -             | -       | -       | -       | -       | -       | -            | -       | -              | -       | 1.0000  | 0.3062  | -0.1934 | -0.1510 |
| P              | -            | -          | -             | -       | -       | -       | -       | -       | -            | -       | -              | -       | -       | 1.0000  | 0.4598  | 0.7559  |
| S              | -            | -          | -             | -       | -       | -       | -       | -       | -            | -       | -              | -       | -       | -       | 1.0000  | 0.8313  |
| Si             | -            | -          | -             | -       | -       | -       | -       | -       | -            | -       | -              | -       | -       | -       | -       | 1.0000  |

**Supplementary Table 5.** For all species on soft ingesta: correlations, estimated by row-wise method, between the individual elements studied, all elements, tooth row quantity, radular width, radular area, and radular length are given.

|                | Na     | Mg     | P       | S       | K       | Ca      | All elements | Radular length | Radular width | Radular area | Tooth rows | Cl      |
|----------------|--------|--------|---------|---------|---------|---------|--------------|----------------|---------------|--------------|------------|---------|
| Na             | 1.0000 | 0.9798 | -0.4860 | -0.4031 | -0.0090 | 0.1967  | -0.2035      | 0.4334         | -0.4290       | 0.4322       | 0.4329     | -0.4371 |
| Mg             | -      | 1.0000 | -0.0681 | -0.1788 | 0.0911  | 0.3953  | -0.0633      | 0.3803         | -0.3768       | 0.3801       | 0.3788     | -0.2833 |
| P              | -      | -      | 1.0000  | 0.1701  | 1.0000  | 0.7373  | 0.9275       | -0.6417        | 0.6368        | -0.6383      | -0.6415    | 0.7072  |
| S              | -      | -      | -       | 1.0000  | -0.1051 | -0.8910 | 0.5402       | -0.8049        | 0.8026        | -0.7986      | -0.8050    | 0.1175  |
| K              | -      | -      | -       | -       | 1.0000  | 0.0000  | -0.0277      | 0.0181         | 0.0181        | 0.0181       | -0.0181    | 0.8902  |
| Ca             | -      | -      | -       | -       | -       | 1.0000  | 0.9000       | 0.0563         | 0.0563        | 0.0563       | 0.0000     | 0.9976  |
| All elements   | -      | -      | -       | -       | -       | -       | 1.0000       | -0.8165        | 0.8162        | -0.8080      | -0.8172    | 0.9323  |
| Radular length | -      | -      | -       | -       | -       | -       | -            | 1.0000         | -0.9942       | 0.9948       | 0.9994     | -0.7278 |
| Radular width  | -      | -      | -       | -       | -       | -       | -            | -              | 1.0000        | -0.9780      | -0.9963    | 0.7375  |
| Radular area   | -      | -      | -       | -       | -       | -       | -            | -              | -             | 1.0000       | 0.9915     | -0.7118 |
| Tooth rows     | -      | -      | -       | -       | -       | -       | -            | -              | -             | -            | 1.0000     | -0.7292 |
| Cl             | -      | -      | -       | -       | -       | -       | -            | -              | -             | -            | -          | 1.0000  |

**Supplementary Table 6.** For all species on soft-to-solid ingesta: correlations, estimated by row-wise method, between the individual elements studied, all elements, tooth row quantity, radular width, radular area, and radular length are given.

|    | Na     | Mg     | Si      | P      | S       | K       | Ca     | All elements | Radular length | Radular width | Radular area | Tooth rows | Cl      | Cu      |
|----|--------|--------|---------|--------|---------|---------|--------|--------------|----------------|---------------|--------------|------------|---------|---------|
| Na | 1.0000 | 0.0291 | -0.5241 | 0.3604 | 0.0764  | -0.4508 | 0.1070 | 0.3204       | -0.0264        | -0.1864       | -0.0848      | 0.0995     | 0.4543  | -0.0786 |
| Mg | -      | 1.0000 | 0.2078  | 0.1038 | -0.0720 | 0.3055  | 0.1166 | 0.1861       | -0.1920        | -0.0277       | -0.1214      | -0.1452    | -0.0336 | 0.3808  |
| Si | -      | -      | 1.0000  | 0.2245 | 0.3300  | 1.0000  | 0.1705 | 0.2664       | -0.0298        | 0.5044        | 0.4553       | 0.0998     | -0.1222 | -0.0510 |

|                |   |   |   |        |        |        |        |        |         |         |         |         |         |         |
|----------------|---|---|---|--------|--------|--------|--------|--------|---------|---------|---------|---------|---------|---------|
| P              | - | - | - | 1.0000 | 0.1555 | 0.7421 | 0.4183 | 0.8657 | -0.1311 | 0.1703  | 0.1630  | -0.4524 | 0.8199  | 0.4563  |
| S              | - | - | - | -      | 1.0000 | 0.8022 | 0.1219 | 0.3160 | -0.0504 | 0.0989  | 0.0947  | -0.0595 | 0.2826  | -0.3042 |
| K              | - | - | - | -      | -      | 1.0000 | 0.7695 | 0.2684 | -0.0334 | -0.0334 | -0.0334 | -0.0334 | 0.9417  | 0.0000  |
| Ca             | - | - | - | -      | -      | -      | 1.0000 | 0.7410 | 0.0232  | 0.2909  | 0.3081  | -0.0204 | 0.4731  | 0.2579  |
| All elements   | - | - | - | -      | -      | -      | -      | 1.0000 | -0.0572 | 0.0954  | 0.1157  | -0.4332 | 0.8246  | 0.4445  |
| Radular length | - | - | - | -      | -      | -      | -      | -      | 1.0000  | 0.4330  | 0.6219  | 0.5617  | -0.1173 | -0.0960 |
| Radular width  | - | - | - | -      | -      | -      | -      | -      | -       | 1.0000  | 0.9671  | 0.3174  | -0.0220 | -0.0962 |
| Radular area   | - | - | - | -      | -      | -      | -      | -      | -       | -       | 1.0000  | 0.4168  | 0.0662  | -0.0960 |
| Tooth rows     | - | - | - | -      | -      | -      | -      | -      | -       | -       | -       | 1.0000  | -0.3108 | -0.0955 |
| Cl             | - | - | - | -      | -      | -      | -      | -      | -       | -       | -       | -       | 1.0000  | 0.0595  |
| Cu             | - | - | - | -      | -      | -      | -      | -      | -       | -       | -       | -       | -       | 1.0000  |

**Supplementary Table 7.** For all species on medium ingesta: correlations, estimated by row-wise method, between the individual elements studied, all elements, tooth row quantity, radular width, radular area, and radular length are given.

|                | Na     | Mg     | Si     | P      | S      | K       | Ca     | All elements | Radular length | Radular width | Radular area | Tooth rows | F       | Cl      |
|----------------|--------|--------|--------|--------|--------|---------|--------|--------------|----------------|---------------|--------------|------------|---------|---------|
| Na             | 1.0000 | 0.2541 | 0.3488 | 0.5705 | 0.2236 | -0.0219 | 0.4870 | 0.4959       | -0.3992        | -0.5271       | -0.4178      | -0.3363    | 0.4883  | 1.0000  |
| Mg             | -      | 1.0000 | 0.3773 | 0.6078 | 0.2734 | 0.7441  | 0.5527 | 0.5720       | -0.8085        | -0.5184       | -0.7978      | -0.7495    | 0.6386  | -0.8933 |
| Si             | -      | -      | 1.0000 | 0.0483 | 0.8141 | 0.0000  | 0.1209 | 0.6059       | 0.0338         | 0.0338        | 0.0338       | 0.0338     | -0.0777 | 0.0000  |
| P              | -      | -      | -      | 1.0000 | 0.6382 | 0.2912  | 0.9598 | 0.9835       | -0.7252        | -0.9242       | -0.7522      | -0.6764    | 0.9801  | -0.8459 |
| S              | -      | -      | -      | -      | 1.0000 | 0.4092  | 0.2181 | 0.2299       | -0.5842        | -0.6071       | -0.5950      | -0.6643    | 0.6528  | 0.9618  |
| K              | -      | -      | -      | -      | -      | 1.0000  | 0.3183 | 0.6218       | 0.0557         | 0.0557        | 0.0557       | 0.0000     | 0.3435  | 0.0000  |
| Ca             | -      | -      | -      | -      | -      | -       | 1.0000 | 0.9828       | -0.6056        | -0.7238       | -0.6247      | -0.5236    | 0.9439  | -0.7775 |
| All elements   | -      | -      | -      | -      | -      | -       | -      | 1.0000       | -0.4865        | -0.5094       | -0.4956      | -0.4246    | 0.9717  | -0.8207 |
| Radular length | -      | -      | -      | -      | -      | -       | -      | -            | 1.0000         | 0.8291        | 0.9985       | 0.9898     | -0.6890 | 0.1998  |
| Radular width  | -      | -      | -      | -      | -      | -       | -      | -            | -              | 1.0000        | 0.8576       | 0.7978     | -0.8305 | 0.1998  |
| Radular area   | -      | -      | -      | -      | -      | -       | -      | -            | -              | -             | 1.0000       | 0.9861     | -0.7114 | 0.1998  |
| Tooth rows     | -      | -      | -      | -      | -      | -       | -      | -            | -              | -             | -            | 1.0000     | -0.6476 | 0.0000  |
| F              | -      | -      | -      | -      | -      | -       | -      | -            | -              | -             | -            | -          | 1.0000  | -0.7820 |
| Cl             | -      | -      | -      | -      | -      | -       | -      | -            | -              | -             | -            | -          | -       | 1.0000  |

**Supplementary Table 8.** For all species on medium-to-solid ingesta: correlations, estimated by row-wise method, between the individual elements studied, all elements, tooth row quantity, radular width, radular area, and radular length are given.

|    | Na     | Mg     | Si     | P      | S       | K       | Ca      | Fe      | All elements | Radular length | Radular width | Radular area | Tooth rows | F       | Cl      |
|----|--------|--------|--------|--------|---------|---------|---------|---------|--------------|----------------|---------------|--------------|------------|---------|---------|
| Na | 1.0000 | 0.3027 | 0.7349 | 0.1349 | -0.4718 | 0.9918  | 0.3204  | 0.1346  | 0.5016       | 0.6371         | -0.6366       | -0.6363      | 0.6374     | -0.1543 | -0.1472 |
| Mg | -      | 1.0000 | 0.6193 | 0.1632 | -0.5287 | 0.1185  | 0.2258  | 0.3255  | 0.4480       | 0.3305         | -0.3336       | -0.3350      | 0.3271     | 0.0862  | 0.1535  |
| Si | -      | -      | 1.0000 | 0.3542 | -0.5770 | 0.9451  | 0.5224  | 0.2057  | 0.6983       | 0.6726         | -0.6721       | -0.6720      | 0.6735     | 0.2828  | 0.3018  |
| P  | -      | -      | -      | 1.0000 | -0.1127 | 0.3511  | 0.9374  | 0.2233  | 0.8971       | 0.1314         | -0.1319       | -0.1319      | 0.1293     | 1.0000  | 0.9983  |
| S  | -      | -      | -      | -      | 1.0000  | -0.6417 | -0.2580 | -0.1534 | -0.3129      | -0.6663        | 0.6665        | 0.6666       | -0.6659    | 0.0010  | 0.1154  |
| K  | -      | -      | -      | -      | -       | 1.0000  | 0.9194  | -0.2280 | 0.8096       | 0.0600         | 0.0600        | 0.0600       | 0.0600     | 0.9191  | 0.0000  |
| Ca | -      | -      | -      | -      | -       | -       | 1.0000  | 0.3338  | 0.9579       | 0.3182         | -0.3181       | -0.3178      | 0.3166     | 0.9285  | 0.9808  |

|                |   |   |   |   |   |   |   |        |        |        |         |         |         |        |         |
|----------------|---|---|---|---|---|---|---|--------|--------|--------|---------|---------|---------|--------|---------|
| Fe             | - | - | - | - | - | - | - | 1.0000 | 0.4299 | 0.0285 | -0.0277 | -0.0273 | 0.0294  | 0.1946 | 0.0428  |
| All elements   | - | - | - | - | - | - | - | -      | 1.0000 | 0.3627 | -0.3631 | -0.3631 | 0.3611  | 0.8990 | 0.9287  |
| Radular length | - | - | - | - | - | - | - | -      | -      | 1.0000 | -1.0000 | -0.9999 | 0.9999  | 0.0468 | -0.1321 |
| Radular width  | - | - | - | - | - | - | - | -      | -      | -      | 1.0000  | 1.0000  | -0.9998 | 0.0468 | 0.1294  |
| Radular area   | - | - | - | - | - | - | - | -      | -      | -      | -       | 1.0000  | -0.9998 | 0.0468 | 0.1296  |
| Tooth rows     | - | - | - | - | - | - | - | -      | -      | -      | -       | -       | 1.0000  | 0.0468 | -0.1439 |
| F              | - | - | - | - | - | - | - | -      | -      | -      | -       | -       | -       | 1.0000 | 0.0000  |
| Cl             | - | - | - | - | - | - | - | -      | -      | -      | -       | -       | -       | -      | 1.0000  |

**Supplementary Table 9.** For all species on solid ingesta: correlations, estimated by row-wise method, between the individual elements studied, all elements, tooth row quantity, radular width, radular area, and radular length are given.

|                | Na     | Mg     | Si      | P      | S       | K      | Ca     | Fe      | All elements | Radular length | Radular width | Radular area | Tooth rows | F       | Cl      | Cu      |
|----------------|--------|--------|---------|--------|---------|--------|--------|---------|--------------|----------------|---------------|--------------|------------|---------|---------|---------|
| Na             | 1.0000 | 0.5367 | -0.4898 | 0.3931 | -0.2995 | 0.2752 | 0.5010 | 0.1631  | 0.2902       | -0.3326        | -0.1370       | -0.3181      | -0.5428    | 0.3534  | 0.2253  | 0.2403  |
| Mg             | -      | 1.0000 | 0.7626  | 0.6259 | 0.3225  | 0.3859 | 0.6228 | 0.1671  | 0.6753       | 0.1357         | 0.2484        | 0.1601       | -0.2904    | 0.6340  | -0.0645 | -0.0804 |
| Si             | -      | -      | 1.0000  | 0.7501 | 0.8222  | 0.3729 | 0.6846 | 0.2117  | 0.9438       | 0.7329         | 0.3918        | 0.7314       | 0.5604     | 0.4421  | -0.1907 | 0.3519  |
| P              | -      | -      | -       | 1.0000 | 0.7079  | 0.8128 | 0.7747 | -0.0042 | 0.8697       | 0.4610         | 0.1556        | 0.4596       | 0.0679     | 0.2741  | 0.7388  | 0.1720  |
| S              | -      | -      | -       | -      | 1.0000  | 0.7830 | 0.5768 | -0.1478 | 0.7455       | 0.7887         | 0.3785        | 0.7815       | 0.5065     | -0.0351 | 0.3868  | -0.0610 |
| K              | -      | -      | -       | -      | -       | 1.0000 | 0.6127 | 0.0357  | 0.6105       | 0.5082         | 0.2352        | 0.5076       | 0.1539     | 0.1413  | -0.3759 | -0.1058 |
| Ca             | -      | -      | -       | -      | -       | -      | 1.0000 | 0.3896  | 0.7187       | 0.0703         | -0.2456       | 0.0634       | -0.3322    | 0.3093  | 0.4794  | 0.2163  |
| Fe             | -      | -      | -       | -      | -       | -      | -      | 1.0000  | 0.7597       | 0.1717         | 0.2570        | 0.1788       | 0.1258     | 0.3456  | -1.0000 | -1.0000 |
| All elements   | -      | -      | -       | -      | -       | -      | -      | -       | 1.0000       | 0.4962         | 0.1651        | 0.4917       | 0.1477     | 0.3727  | 0.6909  | 0.3738  |
| Radular length | -      | -      | -       | -      | -       | -      | -      | -       | -            | 1.0000         | 0.5327        | 0.9952       | 0.6529     | -0.0751 | -0.0125 | 0.1754  |
| Radular width  | -      | -      | -       | -      | -       | -      | -      | -       | -            | -              | 1.0000        | 0.6015       | 0.5212     | -0.5965 | 0.0636  | 0.1754  |
| Radular area   | -      | -      | -       | -      | -       | -      | -      | -       | -            | -              | -             | 1.0000       | 0.6381     | -0.0876 | 0.0172  | 0.1754  |
| Tooth rows     | -      | -      | -       | -      | -       | -      | -      | -       | -            | -              | -             | -            | 1.0000     | -0.2955 | -0.0730 | 0.1754  |
| F              | -      | -      | -       | -      | -       | -      | -      | -       | -            | -              | -             | -            | -          | 1.0000  | 0.0000  | 0.0000  |
| Cl             | -      | -      | -       | -      | -       | -      | -      | -       | -            | -              | -             | -            | -          | -       | 1.0000  | 0.2635  |
| Cu             | -      | -      | -       | -      | -       | -      | -      | -       | -            | -              | -             | -            | -          | -       | -       | 1.0000  |

**Supplementary Table 10.** For all Caenogastropoda: correlations, estimated by row-wise method, between the individual elements studied, all elements, tooth row quantity, radular width, radular area, and radular length are given.

|    | Na     | Mg     | Si      | P       | S       | K      | Ca     | Fe      | All elements | Radular length | Radular width | Radular area | Tooth rows | F      | Cl      | Cu      |
|----|--------|--------|---------|---------|---------|--------|--------|---------|--------------|----------------|---------------|--------------|------------|--------|---------|---------|
| Na | 1.0000 | 0.0805 | -0.4220 | -0.0766 | -0.1055 | 0.1726 | 0.0645 | 0.0215  | 0.0997       | 0.1623         | 0.0599        | 0.0872       | 0.1112     | 0.1543 | 0.0797  | 0.2403  |
| Mg | -      | 1.0000 | 0.4899  | -0.1037 | -0.1994 | 0.0563 | 0.1003 | 0.3535  | 0.1222       | 0.1844         | -0.2272       | -0.0630      | 0.2014     | 0.0862 | -0.2294 | -0.0804 |
| Si | -      | -      | 1.0000  | 0.2624  | -0.2031 | 0.8765 | 0.4769 | 0.2886  | 0.6648       | 0.7703         | -0.5443       | 0.5207       | 0.7512     | 0.2828 | -0.1831 | 0.3519  |
| P  | -      | -      | -       | 1.0000  | 0.3275  | 0.2708 | 0.4844 | 0.2702  | 0.8297       | -0.0983        | 0.2607        | 0.2008       | -0.3480    | 1.0000 | 0.9210  | 0.1720  |
| S  | -      | -      | -       | -       | 1.0000  | 0.5901 | 0.1371 | -0.1060 | 0.3456       | -0.1026        | 0.1762        | 0.1067       | -0.1173    | 0.0010 | 0.4418  | -0.0610 |
| K  | -      | -      | -       | -       | -       | 1.0000 | 0.6094 | -0.2280 | 0.2635       | 0.1229         | -0.0003       | 0.0805       | 0.1810     | 0.9191 | 0.6914  | -0.1058 |
| Ca | -      | -      | -       | -       | -       | -      | 1.0000 | 0.4187  | 0.8342       | 0.0686         | 0.1714        | 0.1889       | -0.0896    | 0.9285 | 0.4459  | 0.2163  |
| Fe | -      | -      | -       | -       | -       | -      | -      | 1.0000  | 0.5118       | 0.0248         | -0.0219       | 0.0520       | 0.0266     | 0.1946 | -0.3531 | -1.0000 |

|                |   |   |   |   |   |   |   |   |        |        |        |        |         |        |         |        |
|----------------|---|---|---|---|---|---|---|---|--------|--------|--------|--------|---------|--------|---------|--------|
| All elements   | - | - | - | - | - | - | - | - | 1.0000 | 0.2104 | 0.2559 | 0.3376 | 0.0121  | 0.8990 | 0.8440  | 0.3738 |
| Radular length | - | - | - | - | - | - | - | - | -      | 1.0000 | 0.1578 | 0.6709 | 0.8381  | 0.0468 | -0.1323 | 0.1754 |
| Radular width  | - | - | - | - | - | - | - | - | -      | -      | 1.0000 | 0.8304 | -0.2179 | 0.0468 | 0.2514  | 0.1754 |
| Radular area   | - | - | - | - | - | - | - | - | -      | -      | -      | 1.0000 | 0.2844  | 0.0468 | 0.2171  | 0.1754 |
| Tooth rows     | - | - | - | - | - | - | - | - | -      | -      | -      | -      | 1.0000  | 0.0468 | -0.5491 | 0.1754 |
| F              | - | - | - | - | - | - | - | - | -      | -      | -      | -      | -       | 1.0000 | 0.0000  | 0.0000 |
| Cl             | - | - | - | - | - | - | - | - | -      | -      | -      | -      | -       | -      | 1.0000  | 0.2635 |
| Cu             | - | - | - | - | - | - | - | - | -      | -      | -      | -      | -       | -      | -       | 1.0000 |

**Supplementary Table 11.** For all Cephalopoda: correlations, estimated by row-wise method, between the individual elements studied, all elements, tooth row quantity, radular width, radular area, and radular length are given.

|                | Na     | Mg      | Si     | P      | S       | Ca      | All elements | Radular length | Radular width | Radular area | Tooth rows | Cl      | Cu      |
|----------------|--------|---------|--------|--------|---------|---------|--------------|----------------|---------------|--------------|------------|---------|---------|
| Na             | 1.0000 | -0.0862 | 0.4344 | 0.1609 | 0.2682  | -0.3012 | -0.2053      | -0.0924        | -0.0934       | -0.0922      | -0.0869    | -0.0759 | -0.0786 |
| Mg             | -      | 1.0000  | 0.2170 | 0.4344 | -0.3656 | 0.3113  | 0.5072       | -0.0615        | -0.0617       | -0.0615      | -0.0597    | 0.0676  | 0.3808  |
| Si             | -      | -       | 1.0000 | 0.0629 | -0.1471 | -0.1852 | -0.0197      | -0.1952        | -0.1955       | -0.1950      | -0.1957    | -0.1474 | -0.0510 |
| P              | -      | -       | -      | 1.0000 | -0.1702 | 0.2442  | 0.6100       | 0.0236         | 0.0231        | 0.0237       | 0.0268     | 0.1289  | 0.4563  |
| S              | -      | -       | -      | -      | 1.0000  | -0.2801 | -0.2726      | -0.0501        | -0.0505       | -0.0501      | -0.0466    | -0.0250 | -0.3042 |
| Ca             | -      | -       | -      | -      | -       | 1.0000  | 0.8964       | -0.1890        | -0.1895       | -0.1890      | -0.1844    | 0.6448  | 0.2579  |
| All elements   | -      | -       | -      | -      | -       | -       | 1.0000       | -0.2004        | -0.2010       | -0.2004      | -0.1961    | 0.6322  | 0.4445  |
| Radular length | -      | -       | -      | -      | -       | -       | -            | 1.0000         | 1.0000        | 1.0000       | 0.9981     | -0.3743 | -0.0960 |
| Radular width  | -      | -       | -      | -      | -       | -       | -            | -              | 1.0000        | 0.9999       | 0.9974     | -0.3741 | -0.0962 |
| Radular area   | -      | -       | -      | -      | -       | -       | -            | -              | -             | 1.0000       | 0.9981     | -0.3743 | -0.0960 |
| Tooth rows     | -      | -       | -      | -      | -       | -       | -            | -              | -             | -            | 1.0000     | -0.3757 | -0.0955 |
| Cl             | -      | -       | -      | -      | -       | -       | -            | -              | -             | -            | -          | 1.0000  | 0.0595  |
| Cu             | -      | -       | -      | -      | -       | -       | -            | -              | -             | -            | -          | -       | 1.0000  |

**Supplementary Table 12.** For all Heterobranchia: correlations, estimated by row-wise method, between the individual elements studied, all elements, tooth row quantity, radular width, radular area, and radular length are given.

|                | Na     | Mg     | Si     | P      | S       | K       | Ca      | All elements | Radular length | Radular width | Radular area | Tooth rows | F       | Cl      |
|----------------|--------|--------|--------|--------|---------|---------|---------|--------------|----------------|---------------|--------------|------------|---------|---------|
| Na             | 1.0000 | 0.1215 | 0.0000 | 0.4554 | -0.3232 | -0.0219 | 0.3690  | 0.3796       | 0.0304         | -0.2712       | -0.2575      | 0.4494     | 0.3003  | 0.7044  |
| Mg             | -      | 1.0000 | 0.0000 | 0.3661 | -0.5303 | 0.7441  | 0.3385  | 0.3943       | 0.5955         | 0.3386        | 0.3569       | 0.6736     | 0.1975  | 0.1731  |
| Si             | -      | -      | 1.0000 | 0.0000 | 0.6467  | 0.0000  | 0.0449  | 0.8710       | 0.1121         | 0.1121        | 0.1121       | 0.1121     | 0.0000  | 0.0000  |
| P              | -      | -      | -      | 1.0000 | -0.3555 | 0.2912  | 0.9311  | 0.9714       | -0.0716        | -0.5598       | -0.5397      | 0.6801     | 0.9868  | 0.0900  |
| S              | -      | -      | -      | -      | 1.0000  | 0.4092  | -0.2201 | -0.0802      | -0.1867        | -0.2883       | -0.1836      | -0.1950    | 0.1923  | -0.8609 |
| K              | -      | -      | -      | -      | -       | 1.0000  | 0.3183  | 0.6218       | 0.0557         | 0.0557        | 0.0557       | 0.0000     | 0.3435  | 0.0000  |
| Ca             | -      | -      | -      | -      | -       | -       | 1.0000  | 0.9688       | -0.3715        | -0.5087       | -0.4316      | -0.3027    | 0.9056  | 0.5645  |
| All elements   | -      | -      | -      | -      | -       | -       | -       | 1.0000       | -0.3709        | -0.3782       | -0.3967      | -0.3234    | 0.9651  | 0.4955  |
| Radular length | -      | -      | -      | -      | -       | -       | -       | -            | 1.0000         | 0.7151        | 0.9872       | 0.9936     | -0.6198 | 0.3213  |
| Radular width  | -      | -      | -      | -      | -       | -       | -       | -            | -              | 1.0000        | 0.8135       | 0.6654     | -0.6536 | 0.3502  |
| Radular area   | -      | -      | -      | -      | -       | -       | -       | -            | -              | -             | 1.0000       | 0.9705     | -0.6506 | 0.3288  |



|            |   |   |   |   |   |   |   |   |   |   |   |        |        |         |
|------------|---|---|---|---|---|---|---|---|---|---|---|--------|--------|---------|
| Tooth rows | - | - | - | - | - | - | - | - | - | - | - | 1.0000 | 0.6551 | 0.3175  |
| F          | - | - | - | - | - | - | - | - | - | - | - | -      | 1.0000 | -0.7820 |
| Cl         | - | - | - | - | - | - | - | - | - | - | - | -      | -      | 1.0000  |

**Supplementary Table 13.** For all Neritimorpha: correlations, estimated by row-wise method, between the individual elements studied, all elements, tooth row quantity, radular width, radular area, and radular length are given.

|                | Na     | Mg      | Si     | P      | S      | Ca     | Fe      | All elements | Radular length | Radular width | Radular area | Tooth rows | Cl      |
|----------------|--------|---------|--------|--------|--------|--------|---------|--------------|----------------|---------------|--------------|------------|---------|
| Na             | 1.0000 | -0.7308 | 0.6329 | 0.3771 | 0.0118 | 0.4393 | -0.5176 | 0.5869       | 0.2285         | -0.2285       | -0.2285      | -0.2285    | 0.4055  |
| Mg             | -      | 1.0000  | 0.7413 | 0.5268 | 0.1953 | 0.5420 | -0.0276 | 0.6767       | 0.0111         | -0.0111       | -0.0111      | -0.0111    | 0.5420  |
| Si             | -      | -       | 1.0000 | 0.4296 | 0.0406 | 0.4616 | -0.4164 | 0.6298       | -0.1152        | 0.1152        | 0.1152       | 0.1152     | 0.4549  |
| P              | -      | -       | -      | 1.0000 | 0.0525 | 0.9961 | 0.0972  | 0.9704       | 0.2946         | -0.2946       | -0.2946      | -0.2946    | 1.0000  |
| S              | -      | -       | -      | -      | 1.0000 | 0.0721 | 0.4442  | 0.1642       | -0.0304        | 0.0304        | 0.0304       | 0.0304     | 0.0800  |
| Ca             | -      | -       | -      | -      | -      | 1.0000 | 0.0972  | 0.9687       | 0.2851         | -0.2851       | -0.2851      | -0.2851    | 0.9947  |
| Fe             | -      | -       | -      | -      | -      | -      | 1.0000  | 0.0971       | 0.0071         | -0.0071       | -0.0071      | -0.0071    | 0.0972  |
| All elements   | -      | -       | -      | -      | -      | -      | -       | 1.0000       | 0.2075         | -0.2075       | -0.2075      | -0.2075    | 0.9666  |
| Radular length | -      | -       | -      | -      | -      | -      | -       | -            | 1.0000         | -1.0000       | -1.0000      | -1.0000    | 0.2655  |
| Radular width  | -      | -       | -      | -      | -      | -      | -       | -            | -              | 1.0000        | 1.0000       | 1.0000     | -0.2655 |
| Radular area   | -      | -       | -      | -      | -      | -      | -       | -            | -              | -             | 1.0000       | 1.0000     | -0.2655 |
| Tooth rows     | -      | -       | -      | -      | -      | -      | -       | -            | -              | -             | -            | 1.0000     | -0.2655 |
| Cl             | -      | -       | -      | -      | -      | -      | -       | -            | -              | -             | -            | -          | 1.0000  |

**Supplementary Table 14.** For all Patellogastropoda: correlations, estimated by row-wise method, between the individual elements studied, all elements, tooth row quantity, radular width, radular area, and radular length are given.

|                | Na     | Mg     | Si     | P      | S      | K      | Ca      | Fe      | All elements | Radular length | Radular width | Radular area | Tooth rows | F       |
|----------------|--------|--------|--------|--------|--------|--------|---------|---------|--------------|----------------|---------------|--------------|------------|---------|
| Na             | 1.0000 | 0.4054 | 0.0444 | 0.1720 | 0.0004 | 0.7917 | -0.0573 | -0.2786 | 0.0398       | 0.0292         | 0.0292        | 0.0292       | 0.0292     | 0.1990  |
| Mg             | -      | 1.0000 | 0.6905 | 0.7199 | 0.5765 | 0.2765 | 0.7898  | -0.3393 | 0.8208       | -0.0603        | -0.0603       | -0.0603      | -0.0603    | 0.3684  |
| Si             | -      | -      | 1.0000 | 0.6218 | 0.5127 | 0.1917 | 0.6912  | -0.3365 | 0.9518       | -0.0187        | -0.0187       | -0.0187      | -0.0187    | 0.3986  |
| P              | -      | -      | -      | 1.0000 | 0.7770 | 0.8953 | 0.7553  | -0.2064 | 0.8182       | 0.0251         | 0.0251        | 0.0251       | 0.0251     | 0.4228  |
| S              | -      | -      | -      | -      | 1.0000 | 0.7859 | 0.6292  | -0.0483 | 0.7286       | 0.0597         | 0.0597        | 0.0597       | 0.0597     | 0.0943  |
| K              | -      | -      | -      | -      | -      | 1.0000 | 0.5936  | -0.0835 | 0.7368       | 0.0578         | 0.0578        | 0.0578       | 0.0578     | 0.2155  |
| Ca             | -      | -      | -      | -      | -      | -      | 1.0000  | -0.2542 | 0.8481       | 0.0248         | 0.0248        | 0.0248       | 0.0248     | 0.2714  |
| Fe             | -      | -      | -      | -      | -      | -      | -       | 1.0000  | 0.0069       | 0.0685         | 0.0685        | 0.0685       | 0.0685     | -0.0058 |
| All elements   | -      | -      | -      | -      | -      | -      | -       | -       | 1.0000       | 0.0037         | 0.0037        | 0.0037       | 0.0037     | 0.4760  |
| Radular length | -      | -      | -      | -      | -      | -      | -       | -       | -            | 1.0000         | 1.0000        | 1.0000       | 1.0000     | -0.1141 |
| Radular width  | -      | -      | -      | -      | -      | -      | -       | -       | -            | -              | 1.0000        | 1.0000       | 1.0000     | -0.1141 |
| Radular area   | -      | -      | -      | -      | -      | -      | -       | -       | -            | -              | -             | 1.0000       | 1.0000     | -0.1141 |
| Tooth rows     | -      | -      | -      | -      | -      | -      | -       | -       | -            | -              | -             | -            | 1.0000     | -0.1141 |
| F              | -      | -      | -      | -      | -      | -      | -       | -       | -            | -              | -             | -            | -          | 1.0000  |

**Supplementary Table 15.** For all Polyplacophora: correlations, estimated by row-wise method, between the individual elements studied, all elements, tooth row quantity, radular width, radular area, and radular length are given.

|                | Na     | Mg     | Si     | P      | S       | K      | Ca      | Fe      | All elements | Radular length | Radular width | Radular area | Tooth rows | F       | Cl      |
|----------------|--------|--------|--------|--------|---------|--------|---------|---------|--------------|----------------|---------------|--------------|------------|---------|---------|
| Na             | 1.0000 | 0.3369 | 0.0000 | 0.8285 | -0.0401 | 0.5759 | 0.5620  | 0.1486  | 0.6320       | -0.2192        | -0.2162       | -0.2156      | -0.2120    | -0.1266 | 1.0000  |
| Mg             | -      | 1.0000 | 0.0000 | 0.5393 | 0.7081  | 0.7346 | 0.4142  | -0.1873 | 0.6600       | 0.2766         | 0.2773        | 0.2777       | 0.2789     | 0.4118  | 0.0000  |
| Si             | -      | -      | 1.0000 | 0.0000 | 0.0000  | 0.0000 | 0.4262  | 0.9995  | 0.5247       | 0.3227         | 0.3227        | 0.3227       | 0.0000     | 0.0000  | 0.0000  |
| P              | -      | -      | -      | 1.0000 | -0.2399 | 0.9305 | 0.6599  | 0.0459  | 0.7088       | -0.1558        | -0.1549       | -0.1546      | -0.1531    | 0.0171  | 0.0000  |
| S              | -      | -      | -      | -      | 1.0000  | 0.5752 | -0.1577 | -0.0225 | 0.2565       | 0.3810         | 0.3814        | 0.3815       | 0.3820     | 0.2529  | 0.0000  |
| K              | -      | -      | -      | -      | -       | 1.0000 | -0.0454 | -0.1597 | -0.0641      | 0.2489         | 0.2514        | 0.2518       | 0.2542     | 0.9045  | 0.0000  |
| Ca             | -      | -      | -      | -      | -       | -      | 1.0000  | 0.4868  | 0.6421       | -0.2840        | -0.2835       | -0.2834      | -0.2828    | 0.2319  | 0.0000  |
| Fe             | -      | -      | -      | -      | -       | -      | -       | 1.0000  | 0.9650       | 0.2607         | 0.2613        | 0.2615       | 0.2621     | 0.3292  | 0.0000  |
| All elements   | -      | -      | -      | -      | -       | -      | -       | -       | 1.0000       | 0.2032         | 0.2035        | 0.2036       | 0.2039     | 0.4926  | 1.0000  |
| Radular length | -      | -      | -      | -      | -       | -      | -       | -       | -            | 1.0000         | 0.9999        | 0.9998       | 0.9994     | 0.0767  | -1.0000 |
| Radular width  | -      | -      | -      | -      | -       | -      | -       | -       | -            | -              | 1.0000        | 1.0000       | 0.9998     | 0.0767  | -1.0000 |
| Radular area   | -      | -      | -      | -      | -       | -      | -       | -       | -            | -              | -             | 1.0000       | 0.9998     | 0.0767  | -1.0000 |
| Tooth rows     | -      | -      | -      | -      | -       | -      | -       | -       | -            | -              | -             | -            | 1.0000     | 0.0767  | -1.0000 |
| F              | -      | -      | -      | -      | -       | -      | -       | -       | -            | -              | -             | -            | -          | 1.0000  | 0.0000  |
| Cl             | -      | -      | -      | -      | -       | -      | -       | -       | -            | -              | -             | -            | -          | -       | 1.0000  |

**Supplementary Table 16.** For all Vetigastropoda: correlations, estimated by row-wise method, between the individual elements studied, all elements, tooth row quantity, radular width, radular area, and radular length are given.

|                | Na     | Mg     | Si     | P       | S       | Ca     | All elements | Radular length | Radular width | Radular area | Tooth rows | F       |
|----------------|--------|--------|--------|---------|---------|--------|--------------|----------------|---------------|--------------|------------|---------|
| Na             | 1.0000 | 0.4673 | 0.3488 | -0.1358 | 0.5186  | 0.0360 | 0.3265       | -0.7380        | -0.7360       | -0.7351      | -0.7272    | 0.3462  |
| Mg             | -      | 1.0000 | 0.0077 | -0.1920 | 0.2969  | 0.0618 | 0.0964       | -0.6092        | -0.6085       | -0.6082      | -0.6043    | 0.1491  |
| Si             | -      | -      | 1.0000 | 0.0614  | -0.4365 | 0.3198 | 0.6584       | 0.4389         | 0.4392        | 0.4393       | 0.4385     | -0.1941 |
| P              | -      | -      | -      | 1.0000  | -0.0998 | 0.3308 | 0.6309       | 0.0617         | 0.0620        | 0.0622       | 0.0669     | 0.2921  |
| S              | -      | -      | -      | -       | 1.0000  | 0.0507 | 0.1816       | -0.4564        | -0.4563       | -0.4562      | -0.4481    | -0.0577 |
| Ca             | -      | -      | -      | -       | -       | 1.0000 | 0.8458       | 0.0400         | 0.0408        | 0.0411       | 0.0407     | 0.2588  |
| All elements   | -      | -      | -      | -       | -       | -      | 1.0000       | -0.0594        | -0.0587       | -0.0583      | -0.0544    | 0.3530  |
| Radular length | -      | -      | -      | -       | -       | -      | -            | 1.0000         | 0.9999        | 0.9999       | 0.9973     | -0.2318 |
| Radular width  | -      | -      | -      | -       | -       | -      | -            | -              | 1.0000        | 1.0000       | 0.9977     | -0.2312 |
| Radular area   | -      | -      | -      | -       | -       | -      | -            | -              | -             | 1.0000       | 0.9978     | -0.2308 |
| Tooth rows     | -      | -      | -      | -       | -       | -      | -            | -              | -             | -            | 1.0000     | -0.2173 |
| F              | -      | -      | -      | -       | -       | -      | -            | -              | -             | -            | -          | 1.0000  |

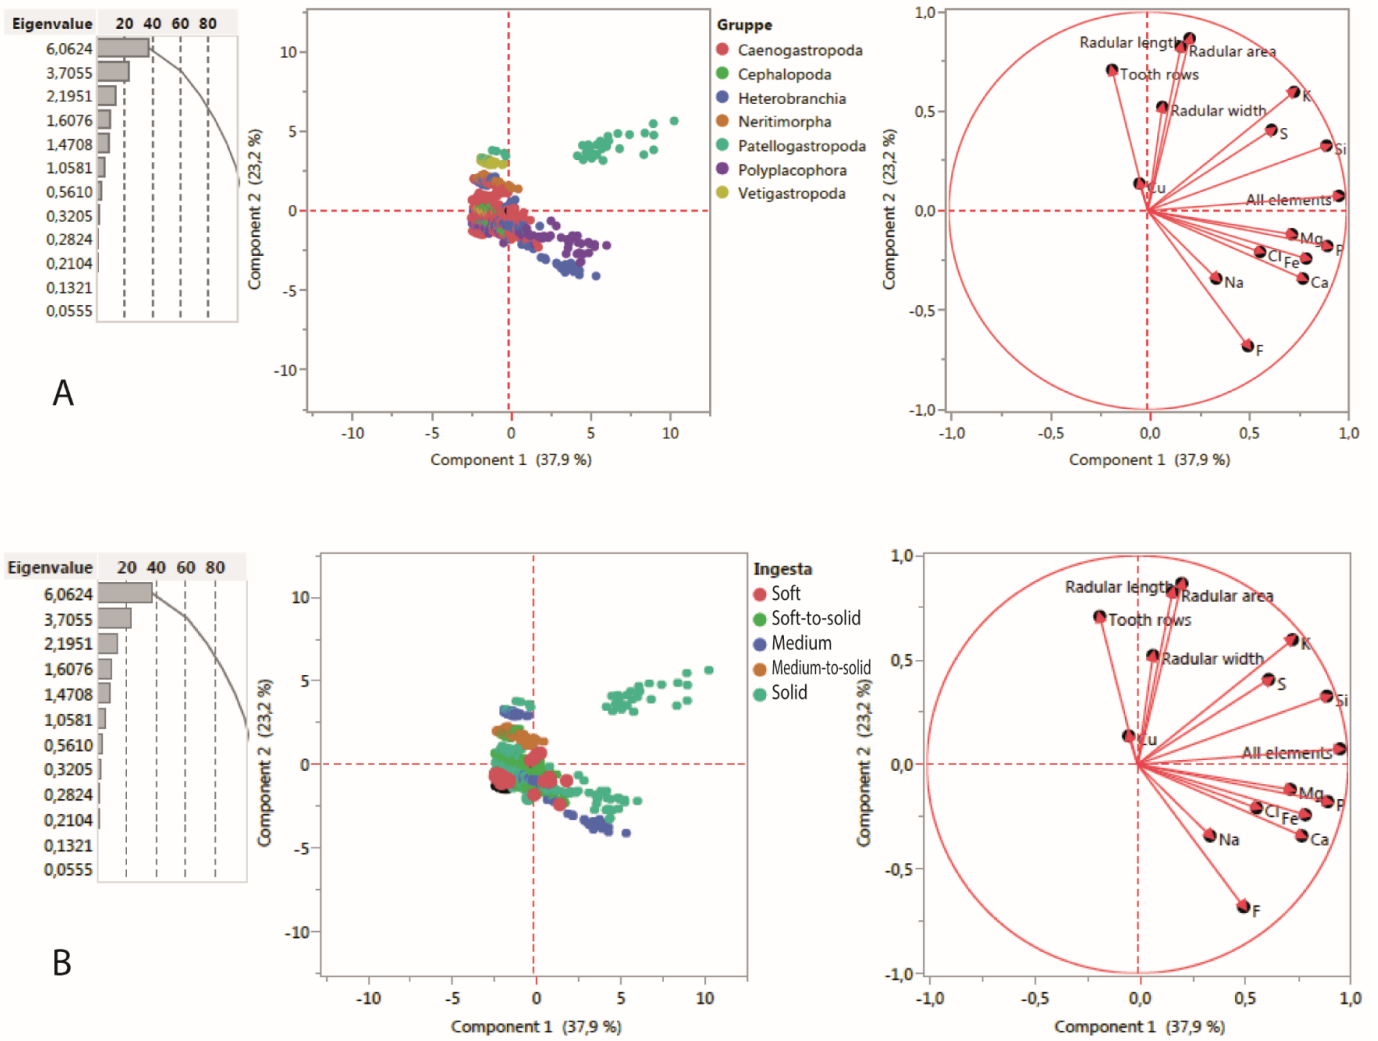

**Supplementary Figure 31.** PCA of all species pooled together with A. highlighted taxonomic groups and B. highlighted ingesta categories. No clustering can be detected.

**Supplementary Table 17.** Summary of the literature on radular chemistry sorted by phylogeny. Methodology of elemental analyses, the analysed zone of the radula and the tooth type are listed.

| Taxa           | Family                  | Species                    | Reference                         | Method                                                                                                                                                                               | Radular zone                           | Tooth type and part                    | Com<br>ment                   | Elements |   |   |   |   |   |   |   |   |   |   |   |   |   |   |   |   |
|----------------|-------------------------|----------------------------|-----------------------------------|--------------------------------------------------------------------------------------------------------------------------------------------------------------------------------------|----------------------------------------|----------------------------------------|-------------------------------|----------|---|---|---|---|---|---|---|---|---|---|---|---|---|---|---|---|
|                |                         |                            |                                   |                                                                                                                                                                                      |                                        |                                        |                               | F        | N | M | S | P | S | C | K | C | F | C |   |   |   |   |   |   |
| Aplacophora    | Chaetodermatida         | Chaetodermatidae           | <i>Falcidens spec.</i>            | (45)                                                                                                                                                                                 | EDXA, ESI                              | Not defined                            |                               |          |   |   |   |   | x | x | x |   |   |   | x | x | x |   |   |   |
|                |                         | Prochaetodermatidae        | <i>Chevroderma turnerae</i>       | (44)                                                                                                                                                                                 | X-ray diffraction, X-ray microanalysis | Not defined                            |                               |          |   |   |   |   |   | x |   |   |   |   |   | x | x |   |   |   |
| Gastropoda     | Caenogastropoda         | Charoniidae                | <i>Charonia lampas</i>            | Bergh from 'Konigl. Danske Videnskabernes Selkabs Skrifur' 5th Raekke, 3 Bind; translation in (41) (termed by Bergh <i>Buccinum antiquorum</i> and by (41) <i>Triton nodiferum</i> ) | Acid treatments and boiling            | Whole radula                           |                               |          |   |   |   |   |   | x |   |   |   |   |   | x | x |   |   |   |
|                |                         | Strombidae                 | <i>Gibberulus gibberulus</i>      | Bergh from 'Konigl. Danske Videnskabernes Selkabs Skrifur,' 5th Raekke, 3 Bind; translation in (41) (termed <i>Strombus gibberulus</i> )                                             | Acid treatments and boiling            | Whole radula                           |                               | ?        | ? | ? | ? | ? | ? | ? | ? | ? | ? | ? | ? | ? | ? | ? |   |   |
|                |                         | Tateidae                   | <i>Potamopyrgus antipodarum</i>   | (43; termed <i>Hydrobia jenkinsi</i> )                                                                                                                                               | Ashing and acid treatment              | Not defined, but probably whole radula | Not defined, but probably all |          |   |   |   |   |   |   | - |   |   |   |   |   |   | - |   |   |
|                |                         | Aporrhaidae                | <i>Aporrhais pespelecani</i>      | (43; termed <i>Hydrobia jenkinsi</i> )                                                                                                                                               | Ashing and acid treatment              | Not defined, but probably whole radula | Not defined, but probably all |          |   |   |   |   |   |   | - |   |   |   |   |   |   |   | - |   |
|                |                         | Littorinidae               | <i>Littorina littorea</i>         | (42)                                                                                                                                                                                 | Ashing and acid treatment              | Whole radula                           | All                           |          |   |   |   |   |   |   | x |   | x |   |   |   |   | x | x |   |
|                |                         |                            |                                   | (43)                                                                                                                                                                                 | Ashing and acid treatment              | Not defined, but probably whole radula | Not defined, but probably all |          |   |   |   |   |   |   |   |   | - |   |   |   |   |   |   | - |
|                |                         |                            | <i>Lacuna vincta</i>              | (43)                                                                                                                                                                                 | Ashing and acid treatment              | Not defined, but probably whole radula | Not defined, but probably all |          |   |   |   |   |   |   |   | - |   |   |   |   |   |   |   | - |
|                |                         | Velutinidae                | <i>Lamellaria perspicua</i>       | Bergh from 'Konigl. Danske Videnskabernes Selkabs Skrifur,' 5th Raekke, 3 Bind; translation in (41) (termed <i>Marsenia perspicua</i> )                                              | Acid treatments and boiling            | Whole radula                           | Not defined, but probably all |          |   |   |   |   |   |   | - |   |   |   |   |   |   |   |   |   |
|                |                         | Tonnaidea                  | <i>Tonna galea</i>                | (41; termed <i>Dolium galea</i> )                                                                                                                                                    | Ashing and acid treatment              | Whole radula                           | All                           |          |   |   |   |   |   |   |   |   |   |   |   |   |   | x | x |   |
|                |                         | Muricidae                  | ? Termed <i>Murex branchialis</i> | (43)                                                                                                                                                                                 | Ashing and acid treatment              | Not defined, but probably whole radula | Not defined, but probably all |          |   |   |   |   |   |   |   | - |   |   |   |   |   |   |   | - |
|                | (42)                    |                            |                                   | Not defined                                                                                                                                                                          | Whole radula                           | All                                    |                               |          |   |   |   |   |   |   |   |   |   |   |   |   |   | x | x |   |
|                | <i>Nucella lapillus</i> |                            | (43)                              | Ashing and acid treatment                                                                                                                                                            | Not defined, but probably whole radula | Not defined, but probably all          |                               |          |   |   |   |   |   |   | - |   |   |   |   |   |   |   |   | - |
|                |                         |                            | (42)                              | Not defined                                                                                                                                                                          | Whole radula                           | All                                    |                               |          |   |   |   |   |   |   |   |   |   |   |   |   |   |   | x | x |
|                | Buccinidae              | <i>Buccinum undatum</i>    | (43)                              | Ashing and acid treatment                                                                                                                                                            | Not defined, but probably whole radula | Not defined, but probably all          |                               |          |   |   |   |   |   | - |   |   |   |   |   |   |   |   | - |   |
|                |                         |                            | (42)                              | Not defined                                                                                                                                                                          | Whole radula                           | All                                    |                               |          |   |   |   |   |   |   |   |   |   |   |   |   |   |   | x | x |
|                | Heterobranchia          | Helicidae                  | <i>Cornu aspersum</i>             | (42; termed <i>Helix aspersa</i> )                                                                                                                                                   | Ashing and acid treatment              | Whole radula                           | All                           | spring   |   |   |   |   |   |   |   |   |   |   |   |   |   |   |   |   |
|                |                         |                            |                                   | (82)                                                                                                                                                                                 | EDX                                    | Working zone                           | Central and lateral teeth     | winter   |   |   |   |   |   |   |   |   |   |   |   |   |   |   |   | x |
|                |                         |                            | (41)                              | Ashing and acid treatment                                                                                                                                                            | Whole radula                           | All                                    |                               |          |   |   |   |   |   |   |   |   |   |   |   |   |   |   | x | x |
|                |                         | Scaphandridae              | <i>Scaphander lignarius</i>       | (43)                                                                                                                                                                                 | Ashing and acid treatment              | Not defined, but probably whole radula | Not defined, but probably all |          |   |   |   |   |   |   | - |   |   |   |   |   |   |   | - |   |
|                |                         | Aplysiidae                 | <i>Aplysia punctata</i>           | (43)                                                                                                                                                                                 | Ashing and acid treatment              | Not defined, but probably whole radula | Not defined, but probably all |          |   |   |   |   |   |   | - |   |   |   |   |   |   |   |   | - |
| Discodorididae |                         | <i>Jorunna tomentosa</i>   | (43)                              | Ashing and acid treatment                                                                                                                                                            | Not defined, but probably whole radula | Not defined, but probably all          |                               |          |   |   |   |   |   | - |   |   |   |   |   |   |   |   | - |   |
| Vetigastropoda | Fissurellidae           | <i>Megathura crenulata</i> | (83)                              | EDX                                                                                                                                                                                  | Working zone                           | All                                    |                               |          |   |   |   |   | x | x | x |   |   |   |   | x | x |   |   |   |
